# Supplementary material for: The human iron-proteome†
Source: Royal Society of Chemistry journal article supplement (doi:10.1039/c8mt00146d), 2018-08-10

**Supplementary Figure S1:** Skyline of the multiple sequence alignment of the mammalian ROR family only those segments including the CYS residue (A) and the His residue (B) potentially involved in heme-binding

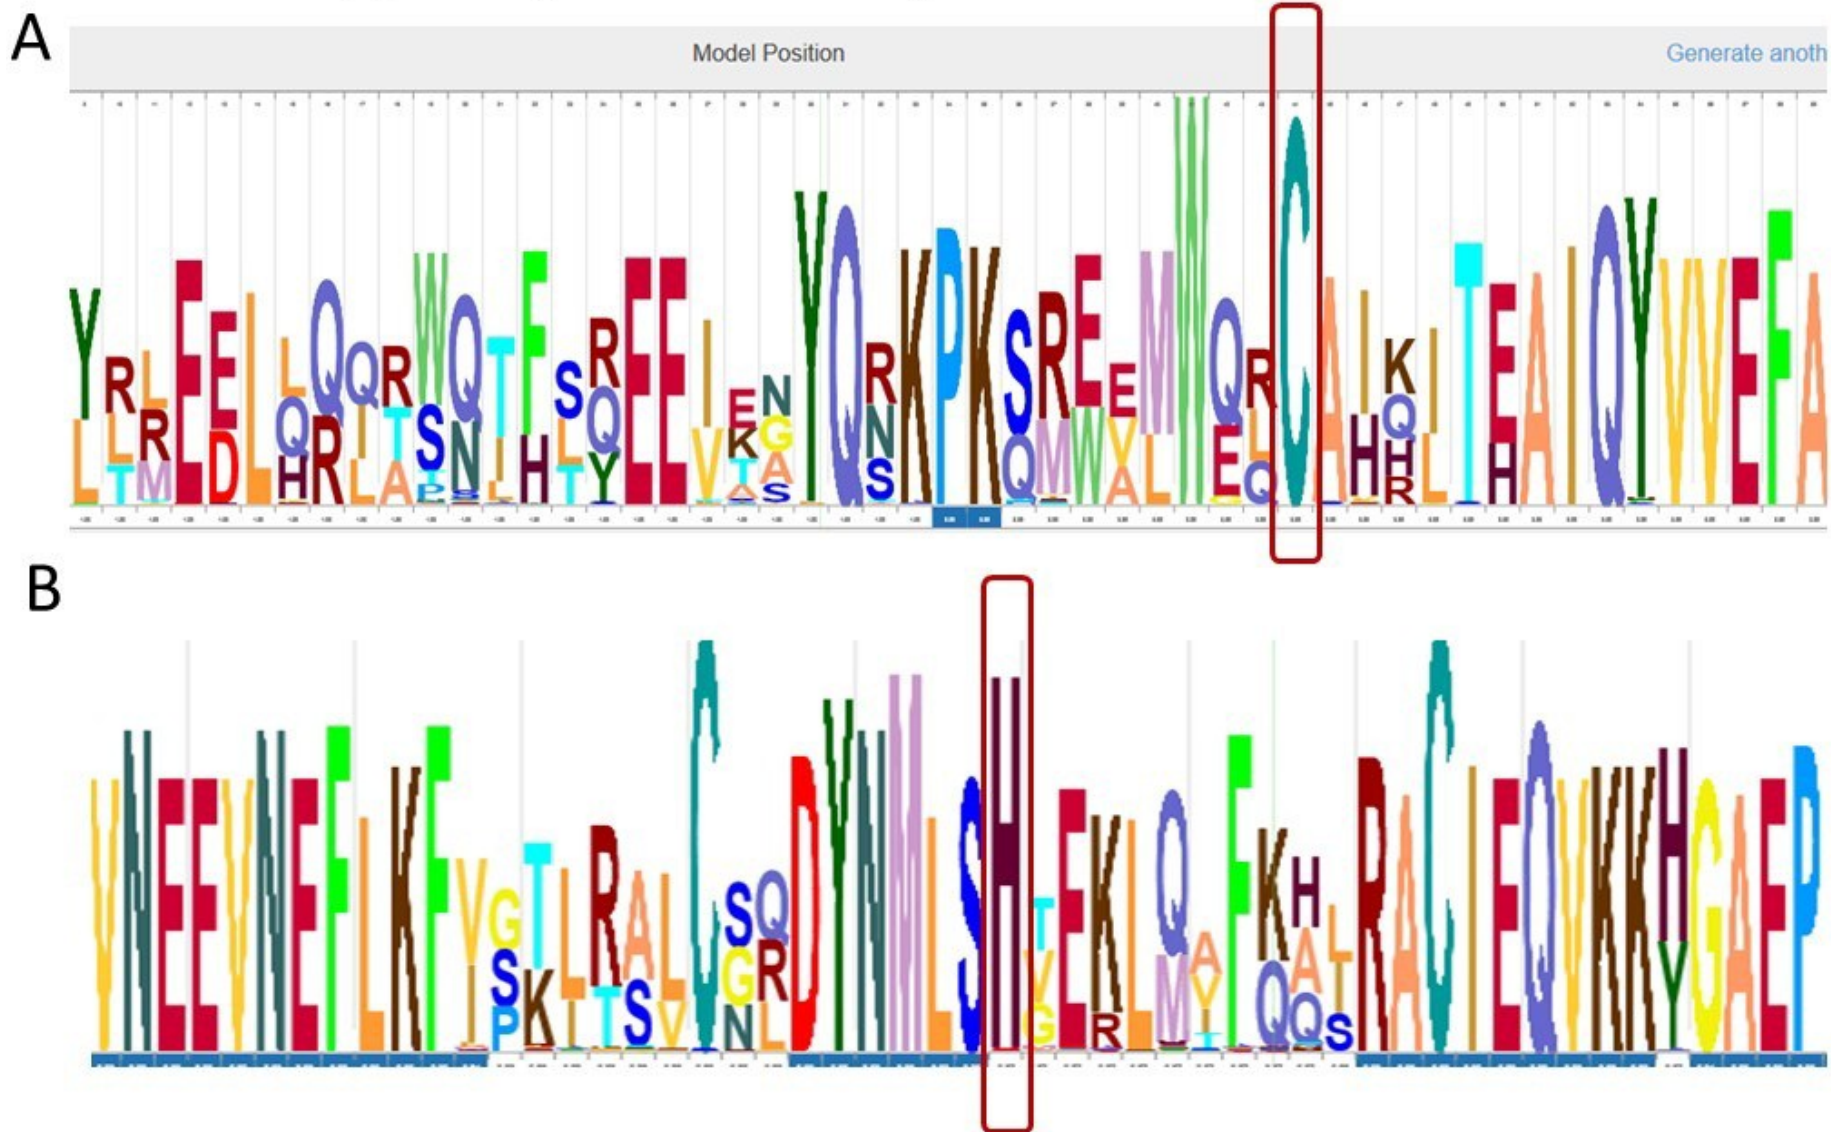

Supplement: c8mt00146d1.pdf [file c8mt00146d1.pdf]
