# Supplementary material for: The human iron-proteome†
Source: Royal Society of Chemistry journal article supplement (doi:10.1039/c8mt00146d), 2018-08-10
Supplement: c8mt00146d2.pdf [file c8mt00146d2.pdf]

### Captions to Supplementary Tables

**Table S1:** List of all human proteins binding individual iron ions. Column 1 is a sequential number; column 2 reports the identifier (*Uniprot ID*) of the protein in the Uniprot (<https://www.uniprot.org/>) database; column 3 (*Confidence level*) summarizes the evidence supporting the assignment of the protein as an iron-protein, which is detailed in the next columns; columns 4 and 5 report for proteins that have been structurally characterized or that have a structurally characterized homolog in the Protein Data Bank (PDB) the PDB identifier and the percentage of sequence identity between the human protein and that homolog (only structures containing iron have been taken into account); columns 6 to 8 (*Method 2, 3 and 4*, respectively) report the search results returned by each method. Columns 6 to 8 have been populated only for proteins that do not have entries in columns 4 and 5. Column 6 refers to the results of Pfam domain searches, after filtering for a known iron-binding pattern (IBP); the name of the Pfam domain and the location of the IBP within the sequence of the predicted human iron-protein are reported. Column 7 refers to the results of local sequence searches, based on the occurrence of a known iron-binding pattern (IBP); the location of the IBP within the sequence of the predicted human iron-protein is reported. Column 8 refers to the results of Pfam domain searches, for domains lacking an associated iron-binding pattern (IBP); the name of the Pfam domain is reported.

**Table S2:** List of all human heme-binding proteins. For details see the caption to Supplementary Table S1.

**Table S3:** List of all human iron-sulfur proteins. For details see the caption to Supplementary Table S1.

**Table S4:** Functional properties of the human proteins binding individual iron ions. Column 1 is a sequential number; column 2 reports the identifier (*Uniprot ID*) of the protein in the Uniprot (<https://www.uniprot.org/>) database; column 3 (*Entry name*) reports the name of this entry in Uniprot; column 4 (*Gene names*) reports the name of the gene, together with all its alternative names in Uniprot, coding for the protein; column 5 (*Protein name*) reports the name of the protein, together with all its alternative names in Uniprot; column 6 (*Predicted pattern*) reports the predicted IBP; column 7 reports the number of iron ions predicted to be in the physiological metal site(s); column 8 (*Iron role*) reports the physiological role of the iron site; column 9 (*EC number*) reports the Enzyme Commission number for iron-dependent enzymes; column 10 reports the subcellular location(s) of the protein; column 11 specifies whether the protein is associated to the membrane; column 12 (*Involvement in disease*) reports the disease annotation in Uniprot; column 13 (*Gene ontology*) reports the terms from the Gene Ontology database associated to the biological processes involving the protein.

**Table S5:** Functional properties of the human heme-binding proteins. For details see the caption to Supplementary Table S4.

**Table S6:** Functional properties of the human iron-sulfur proteins. For details see the caption to Supplementary Table S4.
