# Supplementary material for: The human iron-proteome†
Source: Royal Society of Chemistry journal article supplement (doi:10.1039/c8mt00146d), 2018-08-10
Supplement: c8mt00146d3.pdf [file c8mt00146d3.pdf]

|            |                  |                                                                                                                      |                                         |                                                           | Prediction methods are reported from the most reliable to the less reliable (from left to right) |                                                   |          |
|------------|------------------|----------------------------------------------------------------------------------------------------------------------|-----------------------------------------|-----------------------------------------------------------|--------------------------------------------------------------------------------------------------|---------------------------------------------------|----------|
|            |                  |                                                                                                                      | Method 1                                |                                                           | Method 2                                                                                         | Method 3                                          | Method 4 |
| Uniprot ID | Confidence level | Fe-binding pdb_chain                                                                                                 | Sequence Id with a Fe-binding pdb_chain | Contains a Fe-binding domain with conserved ligands level | Contains a known iron-binding site                                                               | Contains a Fe-binding domain with unknown ligands |          |
| 1          | PHYD1_HUMAN      | A 3D structure of the human protein in the iron-bound form is available                                              | 3obz_A                                  | 100                                                       |                                                                                                  |                                                   |          |
| 2          | PIR_HUMAN        | A 3D structure of the human protein in the iron-bound form is available                                              | 1j11_A                                  | 100                                                       |                                                                                                  |                                                   |          |
| 3          | UTY_HUMAN        | A 3D structure of the human protein in the iron-bound form is available                                              | 3zli_A                                  | 100                                                       |                                                                                                  |                                                   |          |
| 4          | KDM6B_HUMAN      | A 3D structure of the human protein in the iron-bound form is available                                              | 2xue_A                                  | 100                                                       |                                                                                                  |                                                   |          |
| 5          | KDM4A_HUMAN      | A 3D structure of the human protein in the iron-bound form is available                                              | 5anq_A                                  | 100                                                       |                                                                                                  |                                                   |          |
| 6          | KDM4C_HUMAN      | A 3D structure of the human protein in the iron-bound form is available                                              | 4xdo_A                                  | 100                                                       |                                                                                                  |                                                   |          |
| 7          | KDM7A_HUMAN      | A 3D structure of the human protein in the iron-bound form is available                                              | 3kv5_A                                  | 100                                                       |                                                                                                  |                                                   |          |
| 8          | JMJD6_HUMAN      | A 3D structure of the human protein in the iron-bound form is available                                              | 3ld8_A                                  | 100                                                       |                                                                                                  |                                                   |          |
| 9          | PHF2_HUMAN       | A 3D structure of the human protein in the iron-bound form is available                                              | 3pu8_A                                  | 100                                                       |                                                                                                  |                                                   |          |
| 10         | PAHX_HUMAN       | A 3D structure of the human protein in the iron-bound form is available                                              | 2a1x_A                                  | 100                                                       |                                                                                                  |                                                   |          |
| 11         | PHF8_HUMAN       | A 3D structure of the human protein in the iron-bound form is available                                              | 3kv4_A                                  | 100                                                       |                                                                                                  |                                                   |          |
| 12         | EGLN1_HUMAN      | A 3D structure of the human protein in the iron-bound form is available                                              | 2y34_A                                  | 100                                                       |                                                                                                  |                                                   |          |
| 13         | HIF1N_HUMAN      | A 3D structure of the human protein in the iron-bound form is available                                              | 1h2k_A                                  | 100                                                       |                                                                                                  |                                                   |          |
| 14         | TPH2_HUMAN       | A 3D structure of the human protein in the iron-bound form is available                                              | 4v06_A                                  | 100                                                       |                                                                                                  |                                                   |          |
| 15         | TPH1_HUMAN       | A 3D structure of the human protein in the iron-bound form is available                                              | 5j6d_A                                  | 100                                                       |                                                                                                  |                                                   |          |
| 16         | DOHH_HUMAN       | A 3D structure of the human protein in the iron-bound form is available                                              | 4d4z_A                                  | 100                                                       |                                                                                                  |                                                   |          |
| 17         | GSTP1_HUMAN      | A 3D structure of the human protein in the iron-bound form is available                                              | 1zgn_A                                  | 100                                                       |                                                                                                  |                                                   |          |
| 18         | FRIH_HUMAN       | A 3D structure of the human protein in the iron-bound form is available                                              | 4oyn_A                                  | 100                                                       |                                                                                                  |                                                   |          |
| 19         | TRFL_HUMAN       | A 3D structure of the human protein in the iron-bound form is available                                              | 1bka_A                                  | 100                                                       |                                                                                                  |                                                   |          |
| 20         | LX15B_HUMAN      | A 3D structure of the human protein in the iron-bound form is available                                              | 4nre_A                                  | 100                                                       |                                                                                                  |                                                   |          |
| 21         | MTND_HUMAN       | A 3D structure of the human protein in the iron-bound form is available                                              | 4qgn_A                                  | 100                                                       |                                                                                                  |                                                   |          |
| 22         | RIR2B_HUMAN      | A 3D structure of the human protein in the iron-bound form is available                                              | 3hf1_A                                  | 100                                                       |                                                                                                  |                                                   |          |
| 23         | PP2BA_HUMAN      | A 3D structure of the human protein in the iron-bound form is available                                              | 1aui_A                                  | 100                                                       |                                                                                                  |                                                   |          |
| 24         | PP2BB_HUMAN      | A 3D structure of the human protein in the iron-bound form is available                                              | 4or9_A                                  | 100                                                       |                                                                                                  |                                                   |          |
| 25         | RPE_HUMAN        | A 3D structure of the human protein in the iron-bound form is available                                              | 3ovp_A                                  | 100                                                       |                                                                                                  |                                                   |          |
| 26         | FBXL5_HUMAN      | A 3D structure of the human protein in the iron-bound form is available                                              | 3v5x_A                                  | 100                                                       |                                                                                                  |                                                   |          |
| 27         | TET2_HUMAN       | A 3D structure of the human protein in the iron-bound form is available                                              | 5d9y_A                                  | 100                                                       |                                                                                                  |                                                   |          |
| 28         | LOX12_HUMAN      | A 3D structure of the human protein in the iron-bound form is available                                              | 3d3l_A                                  | 99                                                        |                                                                                                  |                                                   |          |
| 29         | FTO_HUMAN        | A 3D structure of the human protein in the iron-bound form is available                                              | 3lfn_A                                  | 99                                                        |                                                                                                  |                                                   |          |
| 30         | KDM4D_HUMAN      | A 3D structure of the human protein in the iron-bound form is available                                              | 3dxu_A                                  | 99                                                        |                                                                                                  |                                                   |          |
| 31         | KDM2A_HUMAN      | A 3D structure of the human protein in the iron-bound form is available                                              | 2yu1_A                                  | 99                                                        |                                                                                                  |                                                   |          |
| 32         | TRFE_HUMAN       | A 3D structure of the human protein in the iron-bound form is available                                              | 3v83_A                                  | 99                                                        |                                                                                                  |                                                   |          |
| 33         | HGD_HUMAN        | A 3D structure of the human protein in the iron-bound form is available                                              | 1ey2_A                                  | 99                                                        |                                                                                                  |                                                   |          |
| 34         | PPA5_HUMAN       | A 3D structure of the human protein in the iron-bound form is available                                              | 1war_A                                  | 99                                                        |                                                                                                  |                                                   |          |
| 35         | HEMH1_HUMAN      | A 3D structure of the human protein in the iron-bound form is available                                              | 3w1w_A                                  | 99                                                        |                                                                                                  |                                                   |          |
| 36         | RIOX1_HUMAN      | A 3D structure of the human protein in the iron-bound form is available                                              | 4e4h_A                                  | 99                                                        |                                                                                                  |                                                   |          |
| 37         | Q7KZA3_HUMAN     | A 3D structure of the human protein in the iron-bound form is available                                              | 3w1w_A                                  | 99                                                        |                                                                                                  |                                                   |          |
| 38         | ETHE1_HUMAN      | A 3D structure of the human protein in the iron-bound form is available                                              | 4chl_A                                  | 98                                                        |                                                                                                  |                                                   |          |
| 39         | LOX5_HUMAN       | A 3D structure of the human protein in the iron-bound form is available                                              | 3o8y_A                                  | 97                                                        |                                                                                                  |                                                   |          |
| 40         | ALKB3_HUMAN      | A 3D structure of the human protein in the iron-bound form is available                                              | 2iuw_A                                  | 97                                                        |                                                                                                  |                                                   |          |
| 41         | RPEL1_HUMAN      | A 3D structure of the human protein in the iron-bound form is available                                              | 3ovp_A                                  | 96                                                        |                                                                                                  |                                                   |          |
| 42         | KDM6A_HUMAN      | A 3D structure of the human protein in the iron-bound form is available                                              | 4uf0_A                                  | 94                                                        |                                                                                                  |                                                   |          |
| 43         | RPE65_HUMAN      | A 3D structure of a close homolog (sequence identity ≥ 50%) of the human protein in the iron-bound form is available | 3fsn_A                                  | 98                                                        |                                                                                                  |                                                   |          |
| 44         | PH4H_HUMAN       | A 3D structure of a close homolog (sequence identity ≥ 50%) of the human protein in the iron-bound form is available | 5den_A                                  | 92                                                        |                                                                                                  |                                                   |          |
| 45         | TY3H_HUMAN       | A 3D structure of a close homolog (sequence identity ≥ 50%) of the human protein in the iron-bound form is available | 1toh_A                                  | 91                                                        |                                                                                                  |                                                   |          |
| 46         | RIR2_HUMAN       | A 3D structure of a close homolog (sequence identity ≥ 50%) of the human protein in the iron-bound form is available | 1w68_A                                  | 91                                                        |                                                                                                  |                                                   |          |
| 47         | HPPD_HUMAN       | A 3D structure of a close homolog (sequence identity ≥ 50%) of the human protein in the iron-bound form is available | 1sqi_A                                  | 89                                                        |                                                                                                  |                                                   |          |

|    |              |                                                                                                                           |        |    |                                                                |  |
|----|--------------|---------------------------------------------------------------------------------------------------------------------------|--------|----|----------------------------------------------------------------|--|
| 48 | MIOX_HUMAN   | A 3D structure of a close homolog (sequence identity $\geq$ 50%) of the human protein in the iron-bound form is available | 2huo_A | 89 |                                                                |  |
| 49 | 3HAO_HUMAN   | A 3D structure of a close homolog (sequence identity $\geq$ 50%) of the human protein in the iron-bound form is available | 3fe5_A | 86 |                                                                |  |
| 50 | KDM4E_HUMAN  | A 3D structure of a close homolog (sequence identity $\geq$ 50%) of the human protein in the iron-bound form is available | 3dxu_A | 84 |                                                                |  |
| 51 | KDM4B_HUMAN  | A 3D structure of a close homolog (sequence identity $\geq$ 50%) of the human protein in the iron-bound form is available | 4xdo_A | 83 |                                                                |  |
| 52 | LOX15_HUMAN  | A 3D structure of a close homolog (sequence identity $\geq$ 50%) of the human protein in the iron-bound form is available | 2p0m_A | 81 |                                                                |  |
| 53 | PP2BC_HUMAN  | A 3D structure of a close homolog (sequence identity $\geq$ 50%) of the human protein in the iron-bound form is available | 1aui_A | 81 |                                                                |  |
| 54 | FTMT_HUMAN   | A 3D structure of a close homolog (sequence identity $\geq$ 50%) of the human protein in the iron-bound form is available | 4oyn_A | 80 |                                                                |  |
| 55 | TET3_HUMAN   | A 3D structure of a close homolog (sequence identity $\geq$ 50%) of the human protein in the iron-bound form is available | 5d9y_A | 72 |                                                                |  |
| 56 | TET1_HUMAN   | A 3D structure of a close homolog (sequence identity $\geq$ 50%) of the human protein in the iron-bound form is available | 5d9y_A | 68 |                                                                |  |
| 57 | KDM2B_HUMAN  | A 3D structure of a close homolog (sequence identity $\geq$ 50%) of the human protein in the iron-bound form is available | 2yu1_A | 66 |                                                                |  |
| 58 | FHL19_HUMAN  | A 3D structure of a close homolog (sequence identity $\geq$ 50%) of the human protein in the iron-bound form is available | 4oyn_A | 66 |                                                                |  |
| 59 | FHL17_HUMAN  | A 3D structure of a close homolog (sequence identity $\geq$ 50%) of the human protein in the iron-bound form is available | 4oyn_A | 65 |                                                                |  |
| 60 | EGLN3_HUMAN  | A 3D structure of a close homolog (sequence identity $\geq$ 50%) of the human protein in the iron-bound form is available | 2g19_A | 64 |                                                                |  |
| 61 | EGLN2_HUMAN  | A 3D structure of a close homolog (sequence identity $\geq$ 50%) of the human protein in the iron-bound form is available | 2y34_A | 64 |                                                                |  |
| 62 | FRIL_HUMAN   | A 3D structure of a close homolog (sequence identity $\geq$ 50%) of the human protein in the iron-bound form is available | 4mjy_A | 60 |                                                                |  |
| 63 | KDM5A_HUMAN  | A 3D structure of a close homolog (sequence identity $\geq$ 50%) of the human protein in the iron-bound form is available | 4igo_A | 56 |                                                                |  |
| 64 | GALT_HUMAN   | A 3D structure of a close homolog (sequence identity $\geq$ 50%) of the human protein in the iron-bound form is available | 1hxq_A | 56 |                                                                |  |
| 65 | D3DRM8_HUMAN | A 3D structure of a close homolog (sequence identity $\geq$ 50%) of the human protein in the iron-bound form is available | 1hxq_A | 56 |                                                                |  |
| 66 | KDM5B_HUMAN  | A 3D structure of a close homolog (sequence identity $\geq$ 50%) of the human protein in the iron-bound form is available | 4igo_A | 55 |                                                                |  |
| 67 | KDM5C_HUMAN  | A 3D structure of a close homolog (sequence identity $\geq$ 50%) of the human protein in the iron-bound form is available | 4igo_A | 54 |                                                                |  |
| 68 | KDM5D_HUMAN  | A 3D structure of a close homolog (sequence identity $\geq$ 50%) of the human protein in the iron-bound form is available | 4igo_A | 54 |                                                                |  |
| 69 | MAP11_HUMAN  | A 3D structure of a close homolog (sequence identity $\geq$ 50%) of the human protein in the iron-bound form is available | 3s6b_A | 53 |                                                                |  |
| 70 | LOXE3_HUMAN  | A 3D structure of a close homolog (sequence identity $\geq$ 50%) of the human protein in the iron-bound form is available | 4nre_A | 51 |                                                                |  |
| 71 | TRFM_HUMAN   | The predicted protein contains an iron-binding Pfam domain with a conserved MBP                                           |        |    | Transferrin (D78-Y107-Y210-H279), Transferrin (Y451-Y556-H625) |  |
| 72 | TMLH_HUMAN   | The predicted protein contains an iron-binding Pfam domain with a conserved MBP                                           |        |    | TauD (H242-D244-H389)                                          |  |
| 73 | BODG_HUMAN   | The predicted protein contains an iron-binding Pfam domain with a conserved MBP                                           |        |    | TauD (H202-D204-H347)                                          |  |
| 74 | BCDO2_HUMAN  | The predicted protein contains an iron-binding Pfam domain with a conserved MBP                                           |        |    | RPE65 (H226-H286-H357-H573)                                    |  |
| 75 | BCDO1_HUMAN  | The predicted protein contains an iron-binding Pfam domain with a conserved MBP                                           |        |    | RPE65 (H172-H237-H308-H514)                                    |  |
| 76 | MAP2_HUMAN   | The predicted protein contains an iron-binding Pfam domain with a conserved MBP                                           |        |    | Peptidase_M24 (D251-D262-H331-E364-E459)                       |  |

|     |             |                                                                                 |  |  |                                                                                            |  |  |
|-----|-------------|---------------------------------------------------------------------------------|--|--|--------------------------------------------------------------------------------------------|--|--|
| 77  | MAP12_HUMAN | The predicted protein contains an iron-binding Pfam domain with a conserved MBP |  |  | Peptidase_M24 (D178-D189-H252-E284-E315)                                                   |  |  |
| 78  | OSGEP_HUMAN | The predicted protein contains an iron-binding Pfam domain with a conserved MBP |  |  | Peptidase_M22 (H109-H113-Y130-D294)                                                        |  |  |
| 79  | NIF3L_HUMAN | The predicted protein contains an iron-binding Pfam domain with a conserved MBP |  |  | NIF3 (H93-H339-E343)                                                                       |  |  |
| 80  | K1456_HUMAN | The predicted protein contains an iron-binding Pfam domain with a conserved MBP |  |  | Methyltransf_11 (H112)                                                                     |  |  |
| 81  | MRE11_HUMAN | The predicted protein contains an iron-binding Pfam domain with a conserved MBP |  |  | Metallophos_2 (D20-H22-D60)                                                                |  |  |
| 82  | MPPD1_HUMAN | The predicted protein contains an iron-binding Pfam domain with a conserved MBP |  |  | Metallophos (D97-H99-D118-H286)                                                            |  |  |
| 83  | PP1A_HUMAN  | The predicted protein contains an iron-binding Pfam domain with a conserved MBP |  |  | Metallophos (D64-H66-D92)                                                                  |  |  |
| 84  | TMM62_HUMAN | The predicted protein contains an iron-binding Pfam domain with a conserved MBP |  |  | Metallophos (D63-H65-D99)                                                                  |  |  |
| 85  | TMPPE_HUMAN | The predicted protein contains an iron-binding Pfam domain with a conserved MBP |  |  | Metallophos (D214-H216-D246-H393)                                                          |  |  |
| 86  | ACP7_HUMAN  | The predicted protein contains an iron-binding Pfam domain with a conserved MBP |  |  | Metallophos (D141-D170-Y173-H335)                                                          |  |  |
| 87  | LX12B_HUMAN | The predicted protein contains an iron-binding Pfam domain with a conserved MBP |  |  | Lipoxygenase (H398-H403-H578)                                                              |  |  |
| 88  | KDM3B_HUMAN | The predicted protein contains an iron-binding Pfam domain with a conserved MBP |  |  | JmjC (H1604-H1689)                                                                         |  |  |
| 89  | JMJD4_HUMAN | The predicted protein contains an iron-binding Pfam domain with a conserved MBP |  |  | JmjC (H235-D237-H315)                                                                      |  |  |
| 90  | HOT_HUMAN   | The predicted protein contains an iron-binding Pfam domain with a conserved MBP |  |  | Fe-ADH (D242-H246-H330-H357)                                                               |  |  |
| 91  | KDM8_HUMAN  | The predicted protein contains an iron-binding Pfam domain with a conserved MBP |  |  | Cupin_8 (H321-D323-H400)                                                                   |  |  |
| 92  | JMJD8_HUMAN | The predicted protein contains an iron-binding Pfam domain with a conserved MBP |  |  | Cupin_8 (H249-H251-H318)                                                                   |  |  |
| 93  | JMJD7_HUMAN | The predicted protein contains an iron-binding Pfam domain with a conserved MBP |  |  | Cupin_8 (H178-D180-H277)                                                                   |  |  |
| 94  | HBAP1_HUMAN | The predicted protein contains an iron-binding Pfam domain with a conserved MBP |  |  | JmjC (H175-D177-H257)                                                                      |  |  |
| 95  | TYW5_HUMAN  | The predicted protein contains an iron-binding Pfam domain with a conserved MBP |  |  | Cupin_8 (H160-D162-H235)                                                                   |  |  |
| 96  | HUTI_HUMAN  | The predicted protein contains an iron-binding Pfam domain with a conserved MBP |  |  | Amidohydro_3 (H87-H89), Amidohydro_3 (H260-H283-D334),<br>Amidohydro_1 (H87-H89-H260-D334) |  |  |
| 97  | P3H1_HUMAN  | The predicted protein contains an iron-binding Pfam domain with a conserved MBP |  |  | 2OG-Fell_Oxy_3 (H587-D589-H659)                                                            |  |  |
| 98  | P3H3_HUMAN  | The predicted protein contains an iron-binding Pfam domain with a conserved MBP |  |  | 2OG-Fell_Oxy_3 (H584-D586-H656)                                                            |  |  |
| 99  | P3H2_HUMAN  | The predicted protein contains an iron-binding Pfam domain with a conserved MBP |  |  | 2OG-Fell_Oxy_3 (H580-D582-H652)                                                            |  |  |
| 100 | P4HA3_HUMAN | The predicted protein contains an iron-binding Pfam domain with a conserved MBP |  |  | 2OG-Fell_Oxy_3 (H440-D442-H510)                                                            |  |  |
| 101 | P4HA2_HUMAN | The predicted protein contains an iron-binding Pfam domain with a conserved MBP |  |  | 2OG-Fell_Oxy_3 (H430-D432-H501)                                                            |  |  |
| 102 | P4HA1_HUMAN | The predicted protein contains an iron-binding Pfam domain with a conserved MBP |  |  | 2OG-Fell_Oxy_3 (H429-D431-H500)                                                            |  |  |
| 103 | P4HTM_HUMAN | The predicted protein contains an iron-binding Pfam domain with a conserved MBP |  |  | 2OG-Fell_Oxy_3 (H328-D330-H441)                                                            |  |  |
| 104 | OGFD3_HUMAN | The predicted protein contains an iron-binding Pfam domain with a conserved MBP |  |  | 2OG-Fell_Oxy_3 (H230-D232-H288)                                                            |  |  |
| 105 | OGFD1_HUMAN | The predicted protein contains an iron-binding Pfam domain with a conserved MBP |  |  | 2OG-Fell_Oxy_3 (H155-D157-H218)                                                            |  |  |

|     |             |                                                                                                                                                                       |  |  |                                   |                                              |       |
|-----|-------------|-----------------------------------------------------------------------------------------------------------------------------------------------------------------------|--|--|-----------------------------------|----------------------------------------------|-------|
| 106 | ALKB8_HUMAN | The predicted protein contains an iron-binding Pfam domain with a conserved MBP                                                                                       |  |  | 2OG-Fell_Oxy_2 (H238-D240-H292)   |                                              |       |
| 107 | ALKB1_HUMAN | The predicted protein contains an iron-binding Pfam domain with a conserved MBP                                                                                       |  |  | 2OG-Fell_Oxy_2 (H231-D233-H287)   |                                              |       |
| 108 | ALKB5_HUMAN | The predicted protein contains an iron-binding Pfam domain with a conserved MBP                                                                                       |  |  | 2OG-Fell_Oxy_2 (H204-D206-H266)   |                                              |       |
| 109 | ALKB2_HUMAN | The predicted protein contains an iron-binding Pfam domain with a conserved MBP                                                                                       |  |  | 2OG-Fell_Oxy_2 (H171-D173-H236)   |                                              |       |
| 110 | ALKB4_HUMAN | The predicted protein contains an iron-binding Pfam domain with a conserved MBP                                                                                       |  |  | 2OG-Fell_Oxy_2 (H169-D171-H254)   |                                              |       |
| 111 | ALKB7_HUMAN | The predicted protein contains an iron-binding Pfam domain with a conserved MBP                                                                                       |  |  | 2OG-Fell_Oxy_2 (H121-D123-H177)   |                                              |       |
| 112 | ALKB6_HUMAN | The predicted protein contains an iron-binding Pfam domain with a conserved MBP                                                                                       |  |  | 2OG-Fell_Oxy_2 (H114-D116-H182)   |                                              |       |
| 113 | PLOD3_HUMAN | The predicted protein contains an iron-binding Pfam domain with a conserved MBP                                                                                       |  |  | 2OG-Fell_Oxy (H667-D669-H719)     |                                              |       |
| 114 | PLOD2_HUMAN | The predicted protein contains an iron-binding Pfam domain with a conserved MBP                                                                                       |  |  | 2OG-Fell_Oxy (H666-D668-H718)     |                                              |       |
| 115 | PLOD1_HUMAN | The predicted protein contains an iron-binding Pfam domain with a conserved MBP                                                                                       |  |  | 2OG-Fell_Oxy (H656-D658-H708)     |                                              |       |
| 116 | JHD2C_HUMAN | The predicted protein contains an iron-binding Pfam domain with a conserved MBP                                                                                       |  |  | JmjC (H2336-E2338-H2466)          |                                              |       |
| 117 | RIOX2_HUMAN | The predicted protein contains an iron-binding Pfam domain with a conserved MBP                                                                                       |  |  | JmjC (H179-D181-H240)             |                                              |       |
| 118 | KDM3A_HUMAN | The predicted protein contains an iron-binding Pfam domain with a conserved MBP                                                                                       |  |  | JmjC (H1120-D1122-H1249)          |                                              |       |
| 119 | HAIR_HUMAN  | The predicted protein contains an iron-binding Pfam domain with a conserved MBP                                                                                       |  |  | JmjC (C1007-E1009-H1125)          |                                              |       |
| 120 | COQ7_HUMAN  | The predicted protein contains an iron-binding Pfam domain with a conserved MBP                                                                                       |  |  | COQ7 (E60-E90-H93-E142-E178-H181) |                                              |       |
| 121 | ASPH_HUMAN  | The predicted protein contains an iron-binding Pfam domain with a conserved MBP                                                                                       |  |  | Asp_Arg_Hydrox (H679-H725)        |                                              |       |
| 122 | ASPH2_HUMAN | The predicted protein contains an iron-binding Pfam domain with a conserved MBP                                                                                       |  |  | Asp_Arg_Hydrox (H283-H328)        |                                              |       |
| 123 | NGAL_HUMAN  | The predicted protein contains a conserved MBP (based on local search)                                                                                                |  |  |                                   | Y126-K145-K154                               |       |
| 124 | SCD5_HUMAN  | The predicted protein contains a conserved MBP (based on local search)                                                                                                |  |  |                                   | H94-H99-H131-H134-H135-H243-H272-H275-H276   |       |
| 125 | OGFD2_HUMAN | The predicted protein contains a conserved MBP (based on local search)                                                                                                |  |  |                                   | H235-D237-H290                               |       |
| 126 | CH25H_HUMAN | The predicted protein contains a conserved MBP (based on local search)                                                                                                |  |  |                                   | H143-H147-H157-H161-H205-H238-H242-H243      |       |
| 127 | SC5D_HUMAN  | The predicted protein contains a conserved MBP (based on local search)                                                                                                |  |  |                                   | H138-H142-H151-H155-H209-H228-H232-H233      |       |
| 128 | ACOD_HUMAN  | The predicted protein contains a conserved MBP (based on local search)                                                                                                |  |  |                                   | H120-H125-H157-H160-H161-H269-H298-H301-H302 |       |
| 129 | AEDO_HUMAN  | The predicted protein contains a conserved MBP (based on local search)                                                                                                |  |  |                                   | H112-H114-H193                               |       |
| 130 | HPDL_HUMAN  | The predicted protein contains a conserved MBP (based on local search)                                                                                                |  |  |                                   | H163-H258-E339                               |       |
| 131 | NRAM2_HUMAN | The predicted protein contains an iron-binding Pfam domain, but the occurrence of the MBP cannot be verified due to the lack of a 3D structure for that domain family |  |  |                                   |                                              | Nramp |
| 132 | NRAM1_HUMAN | The predicted protein contains an iron-binding Pfam domain, but the occurrence of the MBP cannot be verified due to the lack of a 3D structure for that domain family |  |  |                                   |                                              | Nramp |
| 133 | MSMO1_HUMAN | Annotated as iron-binding in Uniprot (pubmed id 20643956)                                                                                                             |  |  |                                   |                                              |       |
| 134 | ALKMO_HUMAN | Annotated as iron-binding in Uniprot (pubmed id 8663358)                                                                                                              |  |  |                                   |                                              |       |
| 135 | FRDA_HUMAN  | Annotated as iron-binding in Uniprot (pubmed id 15641778)                                                                                                             |  |  |                                   |                                              |       |
| 136 | S40A1_HUMAN | Annotated as iron-binding in Uniprot (pubmed id 12091367)                                                                                                             |  |  |                                   |                                              |       |
| 137 | HEPC_HUMAN  | Annotated as iron-binding in Uniprot (pubmed id 16009582)                                                                                                             |  |  |                                   |                                              |       |
| 138 | MFRN2_HUMAN | Annotated as iron-binding in Uniprot                                                                                                                                  |  |  |                                   |                                              |       |
| 139 | MFRN1_HUMAN | Annotated as iron-binding in Uniprot                                                                                                                                  |  |  |                                   |                                              |       |
