# Supplementary material for: The human iron-proteome†
Source: Royal Society of Chemistry journal article supplement (doi:10.1039/c8mt00146d), 2018-08-10
Supplement: c8mt00146d5.pdf [file c8mt00146d5.pdf]

|    |             |                                                                                                                      |                                     |                                                   | Prediction methods are reported from the most reliable to the less reliable<br>(from left to right) |                                                    |                                                                         |
|----|-------------|----------------------------------------------------------------------------------------------------------------------|-------------------------------------|---------------------------------------------------|-----------------------------------------------------------------------------------------------------|----------------------------------------------------|-------------------------------------------------------------------------|
|    | Uniprot ID  | Confidence level                                                                                                     | Method 1<br>Fe-binding<br>pdb_chain | Sequence Id<br>with a Fe-<br>binding<br>pdb_chain | Method 2<br>Contains a Fe-binding domain with conserved ligands level                               | Method 3<br>Contains a known iron-<br>binding site | Method 4<br>Contains a Fe-<br>binding domain<br>with unknown<br>ligands |
| 1  | GLRX5_HUMAN | A 3D structure of the human protein in the iron-bound form is available                                              | 2wul_A                              | 100                                               |                                                                                                     |                                                    |                                                                         |
| 2  | XDH_HUMAN   | A 3D structure of the human protein in the iron-bound form is available                                              | 2ckj_A                              | 100                                               |                                                                                                     |                                                    |                                                                         |
| 3  | AOXA_HUMAN  | A 3D structure of the human protein in the iron-bound form is available                                              | 4uhw_A                              | 100                                               |                                                                                                     |                                                    |                                                                         |
| 4  | ADX_HUMAN   | A 3D structure of the human protein in the iron-bound form is available                                              | 3p1m_A                              | 100                                               |                                                                                                     |                                                    |                                                                         |
| 5  | CISD1_HUMAN | A 3D structure of the human protein in the iron-bound form is available                                              | 2qd0_A                              | 100                                               |                                                                                                     |                                                    |                                                                         |
| 6  | MUTYH_HUMAN | A 3D structure of the human protein in the iron-bound form is available                                              | 3n5n_X                              | 100                                               |                                                                                                     |                                                    |                                                                         |
| 7  | PRI2_HUMAN  | A 3D structure of the human protein in the iron-bound form is available                                              | 4rr2_D                              | 100                                               |                                                                                                     |                                                    |                                                                         |
| 8  | ACOC_HUMAN  | A 3D structure of the human protein in the iron-bound form is available                                              | 2b3x_A                              | 100                                               |                                                                                                     |                                                    |                                                                         |
| 9  | FDX2_HUMAN  | A 3D structure of the human protein in the iron-bound form is available                                              | 2y5c_A                              | 99                                                |                                                                                                     |                                                    |                                                                         |
| 10 | HEMH_HUMAN  | A 3D structure of the human protein in the iron-bound form is available                                              | 3w1w_A                              | 99                                                |                                                                                                     |                                                    |                                                                         |
| 11 | CISD2_HUMAN | A 3D structure of the human protein in the iron-bound form is available                                              | 3fnv_A                              | 97                                                |                                                                                                     |                                                    |                                                                         |
| 12 | ACON_HUMAN  | A 3D structure of a close homolog (sequence identity ≥ 50%) of the human protein in the iron-bound form is available | 1b0j_A                              | 96                                                |                                                                                                     |                                                    |                                                                         |
| 13 | NDUS2_HUMAN | A 3D structure of a close homolog (sequence identity ≥ 50%) of the human protein in the iron-bound form is available | 5gpn_Z                              | 95                                                |                                                                                                     |                                                    |                                                                         |
| 14 | GABT_HUMAN  | A 3D structure of a close homolog (sequence identity ≥ 50%) of the human protein in the iron-bound form is available | 1ohv_A                              | 95                                                |                                                                                                     |                                                    |                                                                         |
| 15 | ETFD_HUMAN  | A 3D structure of a close homolog (sequence identity ≥ 50%) of the human protein in the iron-bound form is available | 2gmh_A                              | 95                                                |                                                                                                     |                                                    |                                                                         |
| 16 | SDHB_HUMAN  | A 3D structure of a close homolog (sequence identity ≥ 50%) of the human protein in the iron-bound form is available | 4ytp_B                              | 95                                                |                                                                                                     |                                                    |                                                                         |
| 17 | GLRX2_HUMAN | A 3D structure of a close homolog (sequence identity ≥ 50%) of the human protein in the iron-bound form is available | 2ht9_A                              | 93                                                |                                                                                                     |                                                    |                                                                         |
| 18 | DPYD_HUMAN  | A 3D structure of a close homolog (sequence identity ≥ 50%) of the human protein in the iron-bound form is available | 1gt8_A                              | 92                                                |                                                                                                     |                                                    |                                                                         |
| 19 | UCRI_HUMAN  | A 3D structure of a close homolog (sequence identity ≥ 50%) of the human protein in the iron-bound form is available | 4d6u_R                              | 90                                                |                                                                                                     |                                                    |                                                                         |
| 20 | UCRIL_HUMAN | A 3D structure of a close homolog (sequence identity ≥ 50%) of the human protein in the iron-bound form is available | 4d6u_R                              | 89                                                |                                                                                                     |                                                    |                                                                         |
| 21 | RFESD_HUMAN | A 3D structure of a close homolog (sequence identity ≥ 50%) of the human protein in the iron-bound form is available | 3d89_A                              | 88                                                |                                                                                                     |                                                    |                                                                         |
| 22 | DNA2_HUMAN  | A 3D structure of a close homolog (sequence identity ≥ 50%) of the human protein in the iron-bound form is available | 5eaw_A                              | 80                                                |                                                                                                     |                                                    |                                                                         |
| 23 | ABCE1_HUMAN | A 3D structure of a close homolog (sequence identity ≥ 50%) of the human protein in the iron-bound form is available | 3j16_B                              | 68                                                |                                                                                                     |                                                    |                                                                         |
| 24 | NDUS7_HUMAN | A 3D structure of a close homolog (sequence identity ≥ 50%) of the human protein in the iron-bound form is available | 2fug_6                              | 55                                                |                                                                                                     |                                                    |                                                                         |
| 25 | IREB2_HUMAN | A 3D structure of a close homolog (sequence identity ≥ 50%) of the human protein in the iron-bound form is available | 2b3x_A                              | 53                                                |                                                                                                     |                                                    |                                                                         |
| 26 | CISD3_HUMAN | A 3D structure of a close homolog (sequence identity ≥ 50%) of the human protein in the iron-bound form is available | 3tbn_A                              | 52                                                |                                                                                                     |                                                    |                                                                         |
| 27 | ISCU_HUMAN  | A 3D structure of a close homolog (sequence identity ≥ 50%) of the human protein in the iron-bound form is available | 4eb5_C                              | 50                                                |                                                                                                     |                                                    |                                                                         |
| 28 | CDKAL_HUMAN | The predicted protein contains an iron-binding Pfam domain with a conserved MBP                                      |                                     |                                                   | UPF0004 (C73-C109-C138); Radical_SAM (C214-C218-C221)                                               |                                                    |                                                                         |
| 29 | CK5P1_HUMAN | The predicted protein contains an iron-binding Pfam domain with a conserved MBP                                      |                                     |                                                   | UPF0004 (C109-C145-C183); Radical_SAM (C258-C262-C265)                                              |                                                    |                                                                         |

|    |             |                                                                                                                                                                       |  |  |                                                                |                         |      |
|----|-------------|-----------------------------------------------------------------------------------------------------------------------------------------------------------------------|--|--|----------------------------------------------------------------|-------------------------|------|
| 30 | AIFM3_HUMAN | The predicted protein contains an iron-binding Pfam domain with a conserved MBP                                                                                       |  |  | Rieske (C109-H111-C128-H131)                                   |                         |      |
| 31 | RSAD2_HUMAN | The predicted protein contains an iron-binding Pfam domain with a conserved MBP                                                                                       |  |  | Radical_SAM (C83-C87-C90)                                      |                         |      |
| 32 | MOC51_HUMAN | The predicted protein contains an iron-binding Pfam domain with a conserved MBP                                                                                       |  |  | Radical_SAM (C80-C84-C87); Mob_synth_C (C312-C315-C329)        |                         |      |
| 33 | RSAD1_HUMAN | The predicted protein contains an iron-binding Pfam domain with a conserved MBP                                                                                       |  |  | Radical_SAM (C49-C53-C56)                                      |                         |      |
| 34 | TYW1B_HUMAN | The predicted protein contains an iron-binding Pfam domain with a conserved MBP                                                                                       |  |  | Radical_SAM (C352-C356-C359)                                   |                         |      |
| 35 | LIAS_HUMAN  | The predicted protein contains an iron-binding Pfam domain with a conserved MBP                                                                                       |  |  | LIAS_N (C106-C111-C117), Radical_SAM (C137-C141-C144)          |                         |      |
| 36 | ELP3_HUMAN  | The predicted protein contains an iron-binding Pfam domain with a conserved MBP                                                                                       |  |  | Radical_SAM (C99-C109-C112)                                    |                         |      |
| 37 | NDUV1_HUMAN | The predicted protein contains an iron-binding Pfam domain with a conserved MBP                                                                                       |  |  | NADH_4Fe-4S (C379-C382-C385-C425)                              |                         |      |
| 38 | GLRX3_HUMAN | The predicted protein contains an iron-binding Pfam domain with a conserved MBP                                                                                       |  |  | Glutaredoxin (C159; C261)                                      |                         |      |
| 39 | NDUS8_HUMAN | The predicted protein contains an iron-binding Pfam domain with a conserved MBP                                                                                       |  |  | Fer4_7 (C121-C150-C153-C156; C111-C114-C117-C160)              |                         |      |
| 40 | NDUS1_HUMAN | The predicted protein contains an iron-binding Pfam domain with a conserved MBP                                                                                       |  |  | Fer2_4 (C64-C75-C78-C92); NADH-G_4Fe-4S_3(H124-C128-C131-C137) | C176-C179-C182-C226     |      |
| 41 | NARFL_HUMAN | The predicted protein contains an iron-binding Pfam domain with a conserved MBP                                                                                       |  |  | Fe_hyd_lg_C (C190-C246-C395-C399)                              | C24-C71-C74-C77         |      |
| 42 | NARF_HUMAN  | The predicted protein contains an iron-binding Pfam domain with a conserved MBP                                                                                       |  |  | Fe_hyd_lg_C (C172-C228-C374-C378)                              |                         |      |
| 43 | FANJ1_HUMAN | The predicted protein contains an iron-binding Pfam domain with a conserved MBP                                                                                       |  |  | DEAD_2 (C283-C298-C310-C350)                                   |                         |      |
| 44 | RTKL1_HUMAN | The predicted protein contains an iron-binding Pfam domain with a conserved MBP                                                                                       |  |  | DEAD_2 (C145-C163-C172-C207)                                   |                         |      |
| 45 | ERCC2_HUMAN | The predicted protein contains an iron-binding Pfam domain with a conserved MBP                                                                                       |  |  | DEAD_2 (C116-C134-C155-C190)                                   |                         |      |
| 46 | NFS1_HUMAN  | The predicted protein contains an iron-binding Pfam domain with a conserved MBP                                                                                       |  |  | Aminotran_5 (C381)                                             |                         |      |
| 47 | NDUV2_HUMAN | The predicted protein contains an iron-binding Pfam domain with a conserved MBP                                                                                       |  |  | 2Fe-2S_thioredx (C135-C140-C176-C180)                          |                         |      |
| 48 | ISCA2_HUMAN | The predicted protein contains an iron-binding Pfam domain with a conserved MBP                                                                                       |  |  | Fe-S_biosyn (C79-C144-C146)                                    |                         |      |
| 49 | ISCA1_HUMAN | The predicted protein contains an iron-binding Pfam domain with a conserved MBP                                                                                       |  |  | Fe-S_biosyn (C57-C121-C123)                                    |                         |      |
| 50 | DPH1_HUMAN  | The predicted protein contains an iron-binding Pfam domain with a conserved MBP                                                                                       |  |  | Diphthamide_syn (C115-C219-C347)                               |                         |      |
| 51 | DDX12_HUMAN | The predicted protein contains an iron-binding Pfam domain with a conserved MBP                                                                                       |  |  | DEAD_2 (C286-C304-C334-C369)                                   |                         |      |
| 52 | DDX11_HUMAN | The predicted protein contains an iron-binding Pfam domain with a conserved MBP                                                                                       |  |  | DEAD_2 (C267-C285-C315-C350)                                   |                         |      |
| 53 | DPH2_HUMAN  | The predicted protein contains an iron-binding Pfam domain with a conserved MBP                                                                                       |  |  | Diphthamide_syn (C88-C341)                                     |                         |      |
| 54 | DPOLA_HUMAN | The predicted protein contains an iron-binding Pfam domain with a conserved MBP                                                                                       |  |  | zf-DNA_Pol (C1348-C1353-C1371-C1374)                           |                         |      |
| 55 | NUBP2_HUMAN | The predicted protein contains an iron-binding Pfam domain with a conserved MBP                                                                                       |  |  | ParA (C196-C199)                                               |                         |      |
| 56 | NUBP1_HUMAN | The predicted protein contains an iron-binding Pfam domain with a conserved MBP                                                                                       |  |  | ParA (C235-C238)                                               | C8-C22-C25-C31          |      |
| 57 | NUBPL_HUMAN | The predicted protein contains an iron-binding Pfam domain with a conserved MBP                                                                                       |  |  | ParA (C244-C247)                                               |                         |      |
| 58 | GRCR1_HUMAN | The predicted protein contains an iron-binding Pfam domain with a conserved MBP                                                                                       |  |  | Glutaredoxin (C156)                                            |                         |      |
| 59 | NTH_HUMAN   | The predicted protein contains a conserved MBP (based on local search)                                                                                                |  |  |                                                                | C290-C297-C300-C306     |      |
| 60 | PUR1_HUMAN  | The predicted protein contains a conserved MBP (based on local search)                                                                                                |  |  |                                                                | C280-C426-C503-C506     |      |
| 61 | CPIN1_HUMAN | The predicted protein contains a conserved MBP (based on local search)                                                                                                |  |  |                                                                | C237-C246-C249-C251     |      |
| 62 | NFU1_HUMAN  | The predicted protein contains a conserved MBP (based on local search)                                                                                                |  |  |                                                                | C210-C213               |      |
| 63 | REV3L_HUMAN | The predicted protein contains a conserved MBP (based on local search)                                                                                                |  |  |                                                                | C1348-C1353-C1371-C1374 |      |
| 64 | DPOD1_HUMAN | The predicted protein contains a conserved MBP (based on local search)                                                                                                |  |  |                                                                | C1058-C1061-C1071-C1076 |      |
| 65 | DPOE1_HUMAN | The predicted protein contains a conserved MBP (based on local search)                                                                                                |  |  |                                                                | C2221-C2224-C2236-C2238 |      |
| 66 | BOLA3_HUMAN | The predicted protein contains an iron-binding Pfam domain, but the occurrence of the MBP cannot be verified due to the lack of a 3D structure for that domain family |  |  |                                                                |                         | BoIA |
| 67 | BOLA2_HUMAN | The predicted protein contains an iron-binding Pfam domain, but the occurrence of the MBP cannot be verified due to the lack of a 3D structure for that domain family |  |  |                                                                |                         | BoIA |
| 68 | BOLA1_HUMAN | The predicted protein contains an iron-binding Pfam domain, but the occurrence of the MBP cannot be verified due to the lack of a 3D structure for that domain family |  |  |                                                                |                         | BoIA |
| 69 | ABC87_HUMAN | Annotated as ironsulfur-binding in Uniprot                                                                                                                            |  |  |                                                                |                         |      |
| 70 | CMAH_HUMAN  | Annotated as ironsulfur-binding in Uniprot                                                                                                                            |  |  |                                                                |                         |      |
