# Supplementary material for: The human iron-proteome†
Source: Royal Society of Chemistry journal article supplement (doi:10.1039/c8mt00146d), 2018-08-10
Supplement: c8mt00146d6.pdf [file c8mt00146d6.pdf]

| Uniprot Id | Entry name  | Gene names            | Protein names                                                                                                                                                                                                                                                                                                                                                 | Predicted Pattern                        | Number of iron ions | Iron role | EC number                        | Subcellular location   | Membrane associated | Involvement in disease | Gene ontology (biological process)                                                                                                                                                                                                                                                                                                                                                                                                                                                                                                                                                                                                                                                                                                                  |
|------------|-------------|-----------------------|---------------------------------------------------------------------------------------------------------------------------------------------------------------------------------------------------------------------------------------------------------------------------------------------------------------------------------------------------------------|------------------------------------------|---------------------|-----------|----------------------------------|------------------------|---------------------|------------------------|-----------------------------------------------------------------------------------------------------------------------------------------------------------------------------------------------------------------------------------------------------------------------------------------------------------------------------------------------------------------------------------------------------------------------------------------------------------------------------------------------------------------------------------------------------------------------------------------------------------------------------------------------------------------------------------------------------------------------------------------------------|
| 1 P46952   | 3HAO_HUMAN  | HAO                   | 3-hydroxyanthranilate 3,4-dioxygenase (EC 1.13.11.6) (3-hydroxyanthranilate oxygenase) (3-HAO) (3-hydroxyanthranilic acid dioxygenase) (HAD)                                                                                                                                                                                                                  | H47-E53-H91                              | 1 Fe cation         | Catalytic | 1.13.11.6                        | Cytoplasm              | No                  |                        | NAD biosynthetic process [GO:0009435]; neuron cellular homeostasis [GO:0070050]; quinolinate biosynthetic process [GO:0019805]; response to cadmium ion [GO:0046686]; response to zinc ion [GO:0010043]; tryptophan catabolic process [GO:0006569]                                                                                                                                                                                                                                                                                                                                                                                                                                                                                                  |
| 2 O00767   | ACOD_HUMAN  | SCD                   | Acyl-CoA desaturase (EC 1.14.19.1) (Delta(9)-desaturase) (Delta-9 desaturase) (Fatty acid desaturase) (Stearoyl-CoA desaturase) (hSCD1)                                                                                                                                                                                                                       | H120-H125-H157-H161; H160-H269-H298-H302 | 2 Fe cations        | Catalytic | 1.14.19.1                        | Endoplasmic reticulum  | Yes                 |                        | long-chain fatty-acyl-CoA biosynthetic process [GO:0035338]; unsaturated fatty acid biosynthetic process [GO:0006636]                                                                                                                                                                                                                                                                                                                                                                                                                                                                                                                                                                                                                               |
| 3 Q62NF0   | ACP7_HUMAN  | ACP7 PAPL PAPL1       | Acid phosphatase type 7 (EC 3.1.3.2) (Purple acid phosphatase long form)                                                                                                                                                                                                                                                                                      | D141-D170-Y173-H335                      | 1 Fe cation         | Catalytic | 3.1.3.2                          | Extracellular space    | No                  |                        |                                                                                                                                                                                                                                                                                                                                                                                                                                                                                                                                                                                                                                                                                                                                                     |
| 4 Q96S25   | AEDO_HUMAN  | ADO C10orf22          | 2-aminoethanethiol dioxygenase (EC 1.13.11.19) (Cysteamine dioxygenase)                                                                                                                                                                                                                                                                                       | H112-H114-H193                           | 1 Fe cation         | Catalytic | 1.13.11.19                       | Unknown                | No                  |                        | oxidation-reduction process [GO:0055114]; sulfur amino acid catabolic process [GO:0000098]                                                                                                                                                                                                                                                                                                                                                                                                                                                                                                                                                                                                                                                          |
| 5 Q13686   | ALKB1_HUMAN | ALKBH1 ABH ABH1 ALKBH | Nucleic acid dioxygenase ALKBH1 (EC 1.14.11.-) (Alkylated DNA repair protein alkB homolog 1) (Alpha-ketoglutarate-dependent dioxygenase ABH1) (DNA 6mA demethylase) (DNA N6-methyl adenine demethylase) (EC 1.14.11.-) (DNA lyase ABH1) (EC 4.2.99.18) (DNA oxidative demethylase ALKBH1) (EC 1.14.11.33) (tRNA N1-methyl adenine demethylase) (EC 1.14.11.-) | H231-D233-H287                           | 1 Fe cation         | Catalytic | 1.14.11.-; 4.2.99.18; 1.14.11.33 | Mitochondrion, Nucleus | No                  |                        | developmental growth [GO:0048589]; DNA dealkylation involved in DNA repair [GO:0006307]; DNA demethylation [GO:0080111]; DNA repair [GO:0006281]; in utero embryonic development [GO:0001701]; negative regulation of neuron apoptotic process [GO:0043524]; neuron migration [GO:0001764]; neuron projection development [GO:0031175]; oxidative demethylation [GO:0070989]; oxidative single-stranded DNA demethylation [GO:0035552]; placenta development [GO:0001890]; regulation of mitochondrial translation [GO:0070129]; regulation of translational elongation [GO:0006448]; regulation of translational initiation [GO:0006446]; RNA repair [GO:0042245]; tRNA demethylation [GO:1990983]; tRNA wobble cytosine modification [GO:0002101] |
| 6 Q6NS38   | ALKB2_HUMAN | ALKBH2 ABH2           | DNA oxidative demethylase ALKBH2 (EC 1.14.11.33) (Alkylated DNA repair protein alkB homolog 2) (Alpha-ketoglutarate-dependent dioxygenase alkB homolog 2) (Oxy DC1)                                                                                                                                                                                           | H171-D173-H236                           | 1 Fe cation         | Catalytic | 1.14.11.33                       | Nucleus                | No                  |                        | DNA dealkylation involved in DNA repair [GO:0006307]; DNA demethylation [GO:0080111]; oxidative demethylation [GO:0070989]; oxidative DNA demethylation [GO:0035511]                                                                                                                                                                                                                                                                                                                                                                                                                                                                                                                                                                                |
| 7 Q96Q83   | ALKB3_HUMAN | ALKBH3 ABH3 DEPC1     | Alpha-ketoglutarate-dependent dioxygenase alkB homolog 3 (EC 1.14.11.54) (Alkylated DNA repair protein alkB homolog 3) (hABH3) (DEPC-1) (Prostate cancer antigen 1)                                                                                                                                                                                           | H191-D193-H257                           | 1 Fe cation         | Catalytic | 1.14.11.54                       | Cytoplasm, Nucleus     | No                  |                        | cell proliferation [GO:0008283]; DNA dealkylation involved in DNA repair [GO:0006307]; DNA repair [GO:0006281]; oxidative single-stranded DNA demethylation [GO:0035552]; oxidative single-stranded RNA demethylation [GO:0035553]                                                                                                                                                                                                                                                                                                                                                                                                                                                                                                                  |
| 8 Q9NXW9   | ALKB4_HUMAN | ALKBH4 ABH4           | Alpha-ketoglutarate-dependent dioxygenase alkB homolog 4 (EC 1.14.11.-) (Alkylated DNA repair protein alkB homolog 4)                                                                                                                                                                                                                                         | H169-D171-H254                           | 1 Fe cation         | Catalytic | 1.14.11.-                        | Cytoplasm, Nucleus     | No                  |                        | actomyosin structure organization [GO:0031032]; cleavage furrow ingression [GO:0036090]; protein demethylation [GO:0006482]; regulation of transcription, DNA-templated [GO:0006355]; transcription, DNA-templated [GO:0006351]                                                                                                                                                                                                                                                                                                                                                                                                                                                                                                                     |
| 9 Q6P6C2   | ALKB5_HUMAN | ALKBH5 ABH5 OFOXD1    | RNA demethylase ALKBH5 (EC 1.14.11.-) (Alkylated DNA repair protein alkB homolog 5) (Alpha-ketoglutarate-dependent dioxygenase alkB homolog 5)                                                                                                                                                                                                                | H204-D206-H266                           | 1 Fe cation         | Catalytic | 1.14.11.-                        | Nucleus                | No                  |                        | cell differentiation [GO:0030154]; DNA dealkylation involved in DNA repair [GO:0006307]; mRNA export from nucleus [GO:0006406]; mRNA processing [GO:0006397]; oxidative single-stranded RNA demethylation [GO:0035553]; response to hypoxia [GO:0001666]; spermatogenesis [GO:0007283]                                                                                                                                                                                                                                                                                                                                                                                                                                                              |
| 10 Q3KRA9  | ALKB6_HUMAN | ALKBH6 ABH6           | Alpha-ketoglutarate-dependent dioxygenase alkB homolog 6 (EC 1.14.11.-) (Alkylated DNA repair protein alkB homolog 6)                                                                                                                                                                                                                                         | H114-D116-H182                           | 1 Fe cation         | Catalytic | 1.14.11.-                        | Cytoplasm, Nucleus     | No                  |                        |                                                                                                                                                                                                                                                                                                                                                                                                                                                                                                                                                                                                                                                                                                                                                     |

|    |        |             |                                      |                                                                                                                                                                                                                                                                  |                                          |              |           |                      |                       |     |                                                                                                                                                                                                                                                                                                                                                                                                                                                                                                                                                 |                                                                                                                                                                                                                                                                                                                                                                                                                                                                                                                                                                                                                                                                                                                                                                                                                                                                                                                                                                                                                                                                                                                                                                                                                                                                                                                                                                                                                                                                                                                                                                                                                                            |
|----|--------|-------------|--------------------------------------|------------------------------------------------------------------------------------------------------------------------------------------------------------------------------------------------------------------------------------------------------------------|------------------------------------------|--------------|-----------|----------------------|-----------------------|-----|-------------------------------------------------------------------------------------------------------------------------------------------------------------------------------------------------------------------------------------------------------------------------------------------------------------------------------------------------------------------------------------------------------------------------------------------------------------------------------------------------------------------------------------------------|--------------------------------------------------------------------------------------------------------------------------------------------------------------------------------------------------------------------------------------------------------------------------------------------------------------------------------------------------------------------------------------------------------------------------------------------------------------------------------------------------------------------------------------------------------------------------------------------------------------------------------------------------------------------------------------------------------------------------------------------------------------------------------------------------------------------------------------------------------------------------------------------------------------------------------------------------------------------------------------------------------------------------------------------------------------------------------------------------------------------------------------------------------------------------------------------------------------------------------------------------------------------------------------------------------------------------------------------------------------------------------------------------------------------------------------------------------------------------------------------------------------------------------------------------------------------------------------------------------------------------------------------|
| 11 | Q9BT30 | ALKB7_HUMAN | ALKBH7 ABH7 SPATA11 UNQ6002/PRO34564 | Alpha-ketoglutarate-dependent dioxygenase alkB homolog 7, mitochondrial (EC 1.14.11.-) (Alkylated DNA repair protein alkB homolog 7) (Spermatogenesis cell proliferation-related protein) (Spermatogenesis-associated protein 11)                                | H121-D123-H177                           | 1 Fe cation  | Catalytic | 1.14.11.-            | Mitochondrion         | No  |                                                                                                                                                                                                                                                                                                                                                                                                                                                                                                                                                 | cellular response to DNA damage stimulus [GO:0006974]; fatty acid metabolic process [GO:0006631]; regulation of lipid storage [GO:0010883]; regulation of mitochondrial membrane permeability involved in programmed necrotic cell death [GO:1902445]                                                                                                                                                                                                                                                                                                                                                                                                                                                                                                                                                                                                                                                                                                                                                                                                                                                                                                                                                                                                                                                                                                                                                                                                                                                                                                                                                                                      |
| 12 | Q96BT7 | ALKB8_HUMAN | ALKBH8 ABH8                          | Alkylated DNA repair protein alkB homolog 8 (EC 1.14.11.-) (Probable alpha-ketoglutarate-dependent dioxygenase ABH8) (S-adenosyl-L-methionine-dependent tRNA methyltransferase ABH8) (tRNA (carboxymethyluridine(34)-5-O)-methyltransferase ABH8) (EC 2.1.1.229) | H238-D240-H292                           | 1 Fe cation  | Catalytic | 1.14.11.-; 2.1.1.229 | Cytoplasm, Nucleus    | No  |                                                                                                                                                                                                                                                                                                                                                                                                                                                                                                                                                 | cellular response to DNA damage stimulus [GO:0006974]; oxidation-reduction process [GO:0055114]; tRNA methylation [GO:0030488]; tRNA wobble uridine modification [GO:0002098]                                                                                                                                                                                                                                                                                                                                                                                                                                                                                                                                                                                                                                                                                                                                                                                                                                                                                                                                                                                                                                                                                                                                                                                                                                                                                                                                                                                                                                                              |
| 13 | Q6ZNB7 | ALKMO_HUMAN | AGMO TMEM195                         | Alkylglycerol monooxygenase (EC 1.14.16.5) (Transmembrane protein 195)                                                                                                                                                                                           | H157-H161-H170-H173; H228-H250-H252-H253 | 2 Fe cations | Catalytic | 1.14.16.5            | Endoplasmic reticulum | Yes |                                                                                                                                                                                                                                                                                                                                                                                                                                                                                                                                                 | ether lipid metabolic process [GO:0046485]; membrane lipid metabolic process [GO:0006643]; triglyceride biosynthetic process [GO:0019432]                                                                                                                                                                                                                                                                                                                                                                                                                                                                                                                                                                                                                                                                                                                                                                                                                                                                                                                                                                                                                                                                                                                                                                                                                                                                                                                                                                                                                                                                                                  |
| 14 | Q12797 | ASPH_HUMAN  | ASPH BAH                             | Aspartyl/asparaginyl beta-hydroxylase (EC 1.14.11.16) (Aspartate beta-hydroxylase) (ASP beta-hydroxylase) (Peptide-aspartate beta-dioxygenase)                                                                                                                   | H679-H725                                | 1 Fe cation  | Catalytic | 1.14.11.16           | Endoplasmic reticulum | Yes | DISEASE: Facial dysmorphism, lens dislocation, anterior segment abnormalities, and spontaneous filtering blebs (FDLAB) [MIM:601552]: A syndrome characterized by dislocated crystalline lenses and anterior segment abnormalities in association with a distinctive facies involving flat cheeks and a beaked nose. Some affected individuals develop highly unusual non-traumatic conjunctival cysts (filtering blebs). {ECO:0000269   PubMed:24768550}. Note=The disease is caused by mutations affecting the gene represented in this entry. | activation of cysteine-type endopeptidase activity [GO:0097202]; activation of store-operated calcium channel activity [GO:0032237]; calcium ion transmembrane transport [GO:0070588]; cellular response to calcium ion [GO:0071277]; detection of calcium ion [GO:0005513]; face morphogenesis [GO:0060325]; ion transmembrane transport [GO:0034220]; limb morphogenesis [GO:0035108]; muscle contraction [GO:0006936]; negative regulation of cell proliferation [GO:0008285]; palate development [GO:0060021]; pattern specification process [GO:0007389]; peptidyl-aspartic acid hydroxylation [GO:0042264]; positive regulation of calcium ion transport into cytosol [GO:0010524]; positive regulation of intracellular protein transport [GO:0090316]; positive regulation of proteolysis [GO:0045862]; positive regulation of ryanodine-sensitive calcium-release channel activity [GO:0060316]; positive regulation of transcription, DNA-templated [GO:0045893]; regulation of cardiac conduction [GO:1903779]; regulation of cardiac muscle contraction by regulation of the release of sequestered calcium ion [GO:0010881]; regulation of cell communication by electrical coupling [GO:0010649]; regulation of inositol 1,4,5-trisphosphate-sensitive calcium-release channel activity [GO:0031585]; regulation of protein depolymerization [GO:1901879]; regulation of protein stability [GO:0031647]; regulation of release of sequestered calcium ion into cytosol by sarcoplasmic reticulum [GO:0010880]; regulation of ryanodine-sensitive calcium-release channel activity [GO:0060314]; response to ATP [GO:0033198] |
| 15 | Q6ICH7 | ASPH2_HUMAN | ASPHD2                               | Aspartate beta-hydroxylase domain-containing protein 2 (EC 1.14.11.-)                                                                                                                                                                                            | H283-H328                                | 1 Fe cation  | Catalytic | 1.14.11.-            | Unknown               | Yes |                                                                                                                                                                                                                                                                                                                                                                                                                                                                                                                                                 | peptidyl-amino acid modification [GO:0018193]                                                                                                                                                                                                                                                                                                                                                                                                                                                                                                                                                                                                                                                                                                                                                                                                                                                                                                                                                                                                                                                                                                                                                                                                                                                                                                                                                                                                                                                                                                                                                                                              |
| 16 | Q9HAY6 | BCDO1_HUMAN | BCO1 BCDO BCDO1 BCMO1                | Beta,beta-carotene 15,15'-dioxygenase (EC 1.13.11.63) (Beta-carotene dioxygenase 1) (Beta-carotene oxygenase 1)                                                                                                                                                  | H172-H237-H308-H514                      | 1 Fe cation  | Catalytic | 1.13.11.63           | Unknown               | No  | DISEASE: Hypercarotenemia and vitamin A deficiency, autosomal dominant (ADHVAD) [MIM:115300]: A disorder characterized by increased serum beta-carotene, decreased conversion of beta-carotene to vitamin A and decreased serum vitamin A. {ECO:0000269   PubMed:17951468}. Note=The disease is caused by mutations affecting the gene represented in this entry.                                                                                                                                                                               | beta-carotene metabolic process [GO:1901810]; retinal metabolic process [GO:0042574]; retinoid metabolic process [GO:0001523]; retinol metabolic process [GO:0042572]; vitamin A biosynthetic process [GO:0035238]                                                                                                                                                                                                                                                                                                                                                                                                                                                                                                                                                                                                                                                                                                                                                                                                                                                                                                                                                                                                                                                                                                                                                                                                                                                                                                                                                                                                                         |
| 17 | Q98YV7 | BCDO2_HUMAN | BCO2 BCDO2                           | Beta,beta-carotene 9',10'-oxygenase (EC 1.13.11.71) (B-diox-II) (Beta-carotene dioxygenase 2)                                                                                                                                                                    | H226-H286-H357-H573                      | 1 Fe cation  | Catalytic | 1.13.11.71           | Mitochondrion         | No  |                                                                                                                                                                                                                                                                                                                                                                                                                                                                                                                                                 | carotene catabolic process [GO:0016121]; carotene metabolic process [GO:0016119]; carotenoid metabolic process [GO:0016116]; oxidation-reduction process [GO:0055114]; regulation of mitochondrial membrane potential [GO:0051881]; regulation of reactive oxygen species metabolic process [GO:2000377]; retinal metabolic process [GO:0042574]; retinoic acid metabolic process [GO:0042573]; retinoid metabolic process [GO:0001523]; xanthophyll metabolic process [GO:0016122]                                                                                                                                                                                                                                                                                                                                                                                                                                                                                                                                                                                                                                                                                                                                                                                                                                                                                                                                                                                                                                                                                                                                                        |

|    |        |              |                                 |                                                                                                                                                                                                                          |                                          |              |           |            |                       |     |                                                                                                                                                                                                                                                                                                                                                                                                                                                                                                                                                                                                                                                                                                   |                                                                                                                                                                                                                                                                                                                                                                                                                                                                                                                                                                                                                                                                                                                                                                                                                                                                                                                                     |
|----|--------|--------------|---------------------------------|--------------------------------------------------------------------------------------------------------------------------------------------------------------------------------------------------------------------------|------------------------------------------|--------------|-----------|------------|-----------------------|-----|---------------------------------------------------------------------------------------------------------------------------------------------------------------------------------------------------------------------------------------------------------------------------------------------------------------------------------------------------------------------------------------------------------------------------------------------------------------------------------------------------------------------------------------------------------------------------------------------------------------------------------------------------------------------------------------------------|-------------------------------------------------------------------------------------------------------------------------------------------------------------------------------------------------------------------------------------------------------------------------------------------------------------------------------------------------------------------------------------------------------------------------------------------------------------------------------------------------------------------------------------------------------------------------------------------------------------------------------------------------------------------------------------------------------------------------------------------------------------------------------------------------------------------------------------------------------------------------------------------------------------------------------------|
| 18 | Q75936 | BODG_HUMAN   | BBOX1 BBH BBOX                  | Gamma-butyrobetaine dioxygenase (EC 1.14.11.1) (Gamma-butyrobetaine hydroxylase) (Gamma-BBH) (Gamma-butyrobetaine,2-oxoglutarate dioxygenase)                                                                            | H202-D204-H347                           | 1 Fe cation  | Catalytic | 1.14.11.1  | Cytoplasm             | No  |                                                                                                                                                                                                                                                                                                                                                                                                                                                                                                                                                                                                                                                                                                   | carnitine biosynthetic process [GO:0045329]                                                                                                                                                                                                                                                                                                                                                                                                                                                                                                                                                                                                                                                                                                                                                                                                                                                                                         |
| 19 | Q95992 | CH25H_HUMAN  | CH25H                           | Cholesterol 25-hydroxylase (EC 1.14.99.38) (Cholesterol 25-monoxygenase) (h25OH)                                                                                                                                         | H143-H147-H157-H161; H205-H238-H242-H243 | 2 Fe cations | Catalytic | 1.14.99.38 | Endoplasmic reticulum | Yes |                                                                                                                                                                                                                                                                                                                                                                                                                                                                                                                                                                                                                                                                                                   | B cell chemotaxis [GO:0035754]; bile acid biosynthetic process [GO:0006699]; cholesterol metabolic process [GO:0008203]; lipid metabolic process [GO:0006629]; sterol biosynthetic process [GO:0016126]                                                                                                                                                                                                                                                                                                                                                                                                                                                                                                                                                                                                                                                                                                                             |
| 20 | Q99807 | COQ7_HUMAN   | COQ7                            | 5-demethoxyubiquinone hydroxylase, mitochondrial (DMQ hydroxylase) (EC 1.14.13.-) (Timing protein clk-1 homolog) (Ubiquinone biosynthesis monoxygenase COQ7)                                                             | E60-E90-H93-E178; E90-E142-E178-H181     | 2 Fe cations | Catalytic | 1.14.13.-  | Mitochondrion         | Yes | DISEASE: Coenzyme Q10 deficiency, primary, 8 (COQ10D8) [MIM:616733]: An autosomal recessive disorder resulting from mitochondrial dysfunction and characterized by decreased levels of coenzyme Q10. Patients manifest neonatal lung hypoplasia, contractures, early infantile hypertension and cardiac hypertrophy, secondary to prenatal kidney dysplasia, with neonatal and infantile renal dysfunction. Clinical features also include progressive peripheral neuropathy, muscular hypotonia and atrophy, and mild psychomotor delay with hearing and visual impairment. {ECO:0000269 PubMed:26084283}. Note=The disease is caused by mutations affecting the gene represented in this entry. | negative regulation of transcription from RNA polymerase II promoter [GO:0000122]; positive regulation of transcription from RNA polymerase II promoter [GO:0045944]; regulation of reactive oxygen species metabolic process [GO:2000377]; ubiquinone biosynthetic process [GO:0006744]                                                                                                                                                                                                                                                                                                                                                                                                                                                                                                                                                                                                                                            |
| 21 | D3DRM8 | D3DRM8_HUMAN | hCG_2040046                     | Galactose-1-phosphate uridylyltransferase                                                                                                                                                                                | E154-H253-H271-H273                      | 1 Fe cation  | Catalytic | 2.7.7.12   | Unknown               | No  |                                                                                                                                                                                                                                                                                                                                                                                                                                                                                                                                                                                                                                                                                                   |                                                                                                                                                                                                                                                                                                                                                                                                                                                                                                                                                                                                                                                                                                                                                                                                                                                                                                                                     |
| 22 | Q9BU89 | DOHH_HUMAN   | DOHH HLRC1                      | Deoxyhypusine hydroxylase (hDOHH) (EC 1.14.99.29) (Deoxyhypusine dioxygenase) (Deoxyhypusine monoxygenase) (HEAT-like repeat-containing protein 1)                                                                       | H56-E57-H89-E90; H207-E208-H240-E241     | 2 Fe cations | Catalytic | 1.14.99.29 | Unknown               | No  |                                                                                                                                                                                                                                                                                                                                                                                                                                                                                                                                                                                                                                                                                                   | peptidyl-lysine modification to peptidyl-hypusine [GO:0008612]                                                                                                                                                                                                                                                                                                                                                                                                                                                                                                                                                                                                                                                                                                                                                                                                                                                                      |
| 23 | Q9GZT9 | EGLN1_HUMAN  | EGLN1 C1orf12 PNAS-118 PNAS-137 | Egl nine homolog 1 (EC 1.14.11.29) (Hypoxia-inducible factor prolyl hydroxylase 2) (HIF-PH2) (HIF-prolyl hydroxylase 2) (HPH-2) (Prolyl hydroxylase domain-containing protein 2) (PHD2) (SM-20)                          | H313-D315-H374                           | 1 Fe cation  | Catalytic | 1.14.11.29 | Cytoplasm, Nucleus    | No  | DISEASE: Erythrocytosis, familial, 3 (ECYT3) [MIM:609820]: An autosomal dominant disorder characterized by increased serum red blood cell mass, elevated serum hemoglobin and hematocrit, and normal serum erythropoietin levels. {ECO:0000269 PubMed:16407130, ECO:0000269 PubMed:17579185}. Note=The disease is caused by mutations affecting the gene represented in this entry.                                                                                                                                                                                                                                                                                                               | cardiac muscle tissue morphogenesis [GO:0055008]; cellular iron ion homeostasis [GO:0006879]; heart trabecula formation [GO:0060347]; labyrinthine layer development [GO:0060711]; negative regulation of cAMP catabolic process [GO:0030821]; negative regulation of cyclic-nucleotide phosphodiesterase activity [GO:0051344]; negative regulation of sequence-specific DNA binding transcription factor activity [GO:0043433]; oxygen homeostasis [GO:0032364]; peptidyl-proline hydroxylation to 4-hydroxy-L-proline [GO:0018401]; positive regulation of transcription from RNA polymerase II promoter [GO:0045944]; regulation of angiogenesis [GO:0045765]; regulation of neuron death [GO:1901214]; regulation of transcription from RNA polymerase II promoter in response to hypoxia [GO:0061418]; response to hypoxia [GO:0001666]; response to nitric oxide [GO:0071731]; ventricular septum morphogenesis [GO:0060412] |
| 24 | Q96KS0 | EGLN2_HUMAN  | EGLN2 EIT6                      | Egl nine homolog 2 (EC 1.14.11.29) (Estrogen-induced tag 6) (HPH-3) (Hypoxia-inducible factor prolyl hydroxylase 1) (HIF-PH1) (HIF-prolyl hydroxylase 1) (HPH-1) (Prolyl hydroxylase domain-containing protein 1) (PHD1) | H297-D299-H358                           | 1 Fe cation  | Catalytic | 1.14.11.29 | Nucleus               | No  |                                                                                                                                                                                                                                                                                                                                                                                                                                                                                                                                                                                                                                                                                                   | cell redox homeostasis [GO:0045454]; intracellular estrogen receptor signaling pathway [GO:0030520]; peptidyl-proline hydroxylation to 4-hydroxy-L-proline [GO:0018401]; positive regulation of protein catabolic process [GO:0045732]; regulation of cell growth [GO:0001558]; regulation of neuron apoptotic process [GO:0043523]; regulation of transcription from RNA polymerase II promoter in response to hypoxia [GO:0061418]; response to hypoxia [GO:0001666]                                                                                                                                                                                                                                                                                                                                                                                                                                                              |
| 25 | Q9H6Z9 | EGLN3_HUMAN  | EGLN3                           | Egl nine homolog 3 (EC 1.14.11.29) (HPH-1) (Hypoxia-inducible factor prolyl hydroxylase 3) (HIF-PH3) (HIF-prolyl hydroxylase 3) (HPH-3) (Prolyl hydroxylase domain-containing protein 3) (PHD3)                          | H135-D137-H196                           | 1 Fe cation  | Catalytic | 1.14.11.29 | Cytoplasm, Nucleus    | No  |                                                                                                                                                                                                                                                                                                                                                                                                                                                                                                                                                                                                                                                                                                   | activation of cysteine-type endopeptidase activity involved in apoptotic process [GO:0006919]; apoptotic process [GO:0006915]; cellular response to DNA damage stimulus [GO:0006974]; peptidyl-proline hydroxylation to 4-hydroxy-L-proline [GO:0018401]; protein hydroxylation [GO:0018126]; regulation of cell proliferation [GO:0042127]; regulation of neuron apoptotic process [GO:0043523]; regulation of transcription from RNA polymerase II promoter in response to hypoxia [GO:0061418]; response to hypoxia [GO:0001666]                                                                                                                                                                                                                                                                                                                                                                                                 |

|    |        |             |                                  |                                                                                                                                                                                                                                              |                                                |                    |                               |            |                                   |    |                                                                                                                                                                                                                                                                                                                                                                                                                                                                                                                                                                                                                                                                                                                                                                                                                                                                                                                                                                                                          |                                                                                                                                                                                                                                                                                                                                                                                                                                                                                                                                                                                                                                                                                                                                                                                                                                                                                                                                                                                                                                                                                                                                                                                                                                                                                        |
|----|--------|-------------|----------------------------------|----------------------------------------------------------------------------------------------------------------------------------------------------------------------------------------------------------------------------------------------|------------------------------------------------|--------------------|-------------------------------|------------|-----------------------------------|----|----------------------------------------------------------------------------------------------------------------------------------------------------------------------------------------------------------------------------------------------------------------------------------------------------------------------------------------------------------------------------------------------------------------------------------------------------------------------------------------------------------------------------------------------------------------------------------------------------------------------------------------------------------------------------------------------------------------------------------------------------------------------------------------------------------------------------------------------------------------------------------------------------------------------------------------------------------------------------------------------------------|----------------------------------------------------------------------------------------------------------------------------------------------------------------------------------------------------------------------------------------------------------------------------------------------------------------------------------------------------------------------------------------------------------------------------------------------------------------------------------------------------------------------------------------------------------------------------------------------------------------------------------------------------------------------------------------------------------------------------------------------------------------------------------------------------------------------------------------------------------------------------------------------------------------------------------------------------------------------------------------------------------------------------------------------------------------------------------------------------------------------------------------------------------------------------------------------------------------------------------------------------------------------------------------|
| 26 | O95571 | ETHE1_HUMAN | ETHE1_HSCO                       | Persulfide dioxygenase ETHE1, mitochondrial (EC 1.13.11.18) (Ethylmalonic encephalopathy protein 1) (Hepatoma subtracted clone one protein) (Sulfur dioxygenase ETHE1)                                                                       | H79-H135-D154                                  | 1 Fe cation        | Catalytic                     | 1.13.11.18 | Cytoplasm, Mitochondrion, Nucleus | No | DISEASE: Ethylmalonic encephalopathy (EE) [MIM:602473]: Autosomal recessive disorder characterized by neurodevelopmental delay and regression, recurrent petechiae, acrocyanosis, diarrhea, leading to death in the first decade of life. It is also associated with persistent lactic acidemia and ethylmalonic and methylsuccinic aciduria. {ECO:0000269 PubMed:14732903, ECO:0000269 PubMed:18593870, ECO:0000269 PubMed:23144459}. Note=The disease is caused by mutations affecting the gene represented in this entry.                                                                                                                                                                                                                                                                                                                                                                                                                                                                             | glutathione metabolic process [GO:0006749]; hydrogen sulfide metabolic process [GO:0070813]; sulfide oxidation, using sulfide:quinone oxidoreductase [GO:0070221]                                                                                                                                                                                                                                                                                                                                                                                                                                                                                                                                                                                                                                                                                                                                                                                                                                                                                                                                                                                                                                                                                                                      |
| 27 | Q9UKA1 | FBXL5_HUMAN | FBXL5_FBL4_FBL5_FLR1             | F-box/LRR-repeat protein 5 (F-box and leucine-rich repeat protein 5) (F-box protein FBL4/FBL5) (p45SKP2-like protein)                                                                                                                        | H15-H57-E58-E61-E130; E61-H80-H126-E130        | 2 Fe cations       | Substrate - regulation        |            | Cytoplasm                         | No |                                                                                                                                                                                                                                                                                                                                                                                                                                                                                                                                                                                                                                                                                                                                                                                                                                                                                                                                                                                                          | iron ion homeostasis [GO:0055072]; positive regulation of cellular protein catabolic process [GO:1903364]; protein polyubiquitination [GO:0000209]; protein ubiquitination [GO:0016567]; SCF-dependent proteasomal ubiquitin-dependent protein catabolic process [GO:0031146]                                                                                                                                                                                                                                                                                                                                                                                                                                                                                                                                                                                                                                                                                                                                                                                                                                                                                                                                                                                                          |
| 28 | Q9BXU8 | FHL17_HUMAN | FTHL17                           | Ferritin heavy polypeptide-like 17 (Cancer/testis antigen 38) (CT38)                                                                                                                                                                         | E28-D45-E50-E65-H66-E108-E135-Q142             | Several Fe cations | Substrate - storage/transport |            | Unknown                           | No |                                                                                                                                                                                                                                                                                                                                                                                                                                                                                                                                                                                                                                                                                                                                                                                                                                                                                                                                                                                                          | intracellular sequestering of iron ion [GO:0006880]; iron ion transport [GO:0006826]                                                                                                                                                                                                                                                                                                                                                                                                                                                                                                                                                                                                                                                                                                                                                                                                                                                                                                                                                                                                                                                                                                                                                                                                   |
| 29 | POC7X4 | FHL19_HUMAN | FTH1P19_FTHL19                   | Putative ferritin heavy polypeptide-like 19 (Ferritin heavy polypeptide 1 pseudogene 19)                                                                                                                                                     | D6-E13-E25-E28-E32-D95-D100                    | Several Fe cations | Substrate - storage/transport |            | Unknown                           | No |                                                                                                                                                                                                                                                                                                                                                                                                                                                                                                                                                                                                                                                                                                                                                                                                                                                                                                                                                                                                          | intracellular sequestering of iron ion [GO:0006880]; iron ion transport [GO:0006826]                                                                                                                                                                                                                                                                                                                                                                                                                                                                                                                                                                                                                                                                                                                                                                                                                                                                                                                                                                                                                                                                                                                                                                                                   |
| 30 | Q16595 | FRDA_HUMAN  | FXN_FRDA_X25                     | Fratxin, mitochondrial (EC 1.16.3.1) (Friedreich ataxia protein) (Fxn) [Cleaved into: Frataxin intermediate form (i-FXN); Frataxin(56-210) (m56-FXN); Frataxin(78-210) (d-FXN) (m78-FXN); Frataxin mature form (Frataxin(81-210)) (m81-FXN)] | Unknown                                        | 1 Fe cation        | Substrate - storage/transport | 1.16.3.1   | Cytoplasm, Mitochondrion          | No | DISEASE: Friedreich ataxia (FRDA) [MIM:229300]: Autosomal recessive, progressive degenerative disease characterized by neurodegeneration and cardiomyopathy it is the most common inherited ataxia. The disorder is usually manifest before adolescence and is generally characterized by incoordination of limb movements, dysarthria, nystagmus, diminished or absent tendon reflexes, Babinski sign, impairment of position and vibratory senses, scoliosis, pes cavus, and hammer toe. In most patients, FRDA is due to GAA triplet repeat expansions in the first intron of the frataxin gene. But in some cases the disease is due to mutations in the coding region. {ECO:0000269 PubMed:10732799, ECO:0000269 PubMed:10874325, ECO:0000269 PubMed:19629184, ECO:0000269 PubMed:9150176, ECO:0000269 PubMed:9779809, ECO:0000269 PubMed:9989622, ECO:0000269 Ref.35, ECO:0000269 Ref.7, ECO:0000269 Ref.8}. Note=The disease is caused by mutations affecting the gene represented in this entry. | adult walking behavior [GO:0007628]; aerobic respiration [GO:0009060]; cellular iron ion homeostasis [GO:0006879]; cellular response to hydrogen peroxide [GO:0070301]; embryo development ending in birth or egg hatching [GO:0009792]; heme biosynthetic process [GO:0006783]; ion transport [GO:0006811]; iron incorporation into metallo-sulfur cluster [GO:0018283]; mitochondrion organization [GO:0007005]; negative regulation of apoptotic process [GO:0043066]; negative regulation of multicellular organism growth [GO:0040015]; negative regulation of organ growth [GO:0046621]; negative regulation of release of cytochrome c from mitochondria [GO:0090201]; oxidative phosphorylation [GO:0006119]; positive regulation of aconitate hydratase activity [GO:1904234]; positive regulation of catalytic activity [GO:0043085]; positive regulation of cell growth [GO:0030307]; positive regulation of cell proliferation [GO:0008284]; positive regulation of lyase activity [GO:0051349]; positive regulation of succinate dehydrogenase activity [GO:1904231]; proprioception [GO:0019230]; protein autoprocessing [GO:0016540]; regulation of ferroxidase activity [GO:0010722]; response to iron ion [GO:0010039]; small molecule metabolic process [GO:0044281] |
| 31 | P02794 | FRIH_HUMAN  | FTH1_FTH_FTHL6_OK/SW-cl.84_PIG15 | Ferritin heavy chain (Ferritin H subunit) (EC 1.16.3.1) (Cell proliferation-inducing gene 15 protein) [Cleaved into: Ferritin heavy chain, N-terminally processed]                                                                           | E28-D43-H58-Q59-E62-E63-E65-H66-E108-D132-Q142 | Several Fe cations | Substrate - storage/transport | 1.16.3.1   | Unknown                           | No | DISEASE: Hemochromatosis 5 (HFE5) [MIM:615517]: A disorder of iron metabolism characterized by iron overload. Excess iron is deposited in a variety of organs leading to their failure, and resulting in serious illnesses including cirrhosis, hepatomas, diabetes, cardiomyopathy, arthritis, and hypogonadotropic hypogonadism. Severe effects of the disease usually do not appear until after decades of progressive iron loading. {ECO:0000269 PubMed:11389486}. Note=The disease is caused by mutations affecting the gene represented in this entry. In a Japanese family affected by HFE5, a single point mutation has been detected in the iron-responsive element (IRE) in the 5'-UTR of FTH1 mRNA. This mutation leads to an increased binding affinity for iron regulatory protein and thereby to the efficient suppression of mRNA translation.                                                                                                                                            | cellular iron ion homeostasis [GO:0006879]; immune response [GO:0006955]; intracellular sequestering of iron ion [GO:0006880]; iron ion import [GO:0097286]; negative regulation of cell proliferation [GO:0008285]; negative regulation of fibroblast proliferation [GO:0048147]; neutrophil degranulation [GO:0043312]                                                                                                                                                                                                                                                                                                                                                                                                                                                                                                                                                                                                                                                                                                                                                                                                                                                                                                                                                               |

|    |        |            |              |                                                                                                        |                                                            |                     |                               |           |               |    |                                                                                                                                                                                                                                                                                                                                                                                                                                                                                                                                                                                                                                                                                                                                                                                                                                                                                                                                                                                                                                                                                                                                                                                                                                                                                                                                                                                                                                                                                                         |                                                                                                                                                                                                                                                                                                                                                                                                                                                                                                                                                                                                                                       |
|----|--------|------------|--------------|--------------------------------------------------------------------------------------------------------|------------------------------------------------------------|---------------------|-------------------------------|-----------|---------------|----|---------------------------------------------------------------------------------------------------------------------------------------------------------------------------------------------------------------------------------------------------------------------------------------------------------------------------------------------------------------------------------------------------------------------------------------------------------------------------------------------------------------------------------------------------------------------------------------------------------------------------------------------------------------------------------------------------------------------------------------------------------------------------------------------------------------------------------------------------------------------------------------------------------------------------------------------------------------------------------------------------------------------------------------------------------------------------------------------------------------------------------------------------------------------------------------------------------------------------------------------------------------------------------------------------------------------------------------------------------------------------------------------------------------------------------------------------------------------------------------------------------|---------------------------------------------------------------------------------------------------------------------------------------------------------------------------------------------------------------------------------------------------------------------------------------------------------------------------------------------------------------------------------------------------------------------------------------------------------------------------------------------------------------------------------------------------------------------------------------------------------------------------------------|
| 32 | P02792 | FRIL_HUMAN | FTL          | Ferritin light chain (Ferritin L subunit)                                                              | D39-D41-E46-E54-E57-E58-E61-E64-D128-E131                  | Severall Fe cations | Substrate - storage/transport |           | Unknown       | No | <p>DISEASE: Hereditary hyperferritinemia-cataract syndrome (HHCS) [MIM:600886]: An autosomal dominant disease characterized by elevated level of ferritin in serum and tissues, and early-onset bilateral cataract.</p> <p>{ECO:0000269   PubMed:19176363}. Note=The disease is caused by mutations affecting the gene represented in this entry.;</p> <p>DISEASE: Neurodegeneration with brain iron accumulation 3 (NBIA3) [MIM:606159]: A neurodegenerative disorder associated with iron accumulation in the brain, primarily in the basal ganglia. It is characterized by a variety of neurological signs including parkinsonism, ataxia, corticospinal signs, mild non-progressive cognitive deficit and episodic psychosis. It is linked with decreased serum ferritin levels.</p> <p>{ECO:0000269   PubMed:16116125}. Note=The disease is caused by mutations affecting the gene represented in this entry.;</p> <p>DISEASE: L-ferritin deficiency (LFTD) [MIM:615604]: A condition characterized by low levels of ferritin in serum and tissues in the absence of other hematological symptoms. Seizures and mild neuropsychologic impairment may manifest in individuals with complete ferritin deficiency.</p> <p>{ECO:0000269   PubMed:23940258}. Note=The disease is caused by mutations affecting the gene represented in this entry.</p>                                                                                                                                                  | cellular iron ion homeostasis [GO:0006879]; intracellular sequestering of iron ion [GO:0006880]; iron ion homeostasis [GO:0055072]; iron ion transport [GO:0006826]; neutrophil degranulation [GO:0043312]                                                                                                                                                                                                                                                                                                                                                                                                                            |
| 33 | Q8N4E7 | FTMT_HUMAN | FTMT         | Ferritin, mitochondrial (EC 1.16.3.1)                                                                  | E87-D104-H117-Q118-E121-E122-E124-H125-E167-D191-Q201-H233 | Severall Fe cations | Substrate - storage/transport | 1.16.3.1  | Mitochondrion | No |                                                                                                                                                                                                                                                                                                                                                                                                                                                                                                                                                                                                                                                                                                                                                                                                                                                                                                                                                                                                                                                                                                                                                                                                                                                                                                                                                                                                                                                                                                         | cellular iron ion homeostasis [GO:0006879]; intracellular sequestering of iron ion [GO:0006880]; iron ion transport [GO:0006826]; positive regulation of aconitate hydratase activity [GO:1904234]; positive regulation of cell proliferation [GO:0008284]; positive regulation of lyase activity [GO:0051349]; positive regulation of succinate dehydrogenase activity [GO:1904231]                                                                                                                                                                                                                                                  |
| 34 | Q9C0B1 | FTO_HUMAN  | FTO KIAA1752 | Alpha-ketoglutarate-dependent dioxygenase FTO (EC 1.14.11.-) (Fat mass and obesity-associated protein) | H231-D233-H307                                             | 1 Fe cation         | Catalytic                     | 1.14.11.- | Nucleus       | No | <p>DISEASE: Growth retardation, developmental delay, and facial dysmorphism (GDFD) [MIM:612938]: A severe polymalformation syndrome characterized by postnatal growth retardation, microcephaly, severe psychomotor delay, functional brain deficits and characteristic facial dysmorphism. In some patients, structural brain malformations, cardiac defects, genital anomalies, and cleft palate are observed. Early death occurs by the age of 3 years.</p> <p>{ECO:0000269   PubMed:19559399, ECO:0000269   PubMed:22002720, ECO:0000269   PubMed:26378117, ECO:0000269   PubMed:26697951}. Note=The disease is caused by mutations affecting the gene represented in this entry.;</p> <p>DISEASE: Obesity (OBESITY) [MIM:601665]: A condition characterized by an increase of body weight beyond the limitation of skeletal and physical requirements, as the result of excessive accumulation of body fat.</p> <p>{ECO:0000269   PubMed:26287746}. Note=Disease susceptibility is associated with variations affecting the gene represented in this entry. A pathogenic intronic FTO variation (rs1421085) disrupts an evolutionarily conserved motif for ARID5B binding. Loss of ARID5B binding results in overexpression of two genes distal to FTO, IRX3 and IRX5. IRX3 and IRX5 overexpression shifts pre-adipocytes differentiation from brown to white fat cells, resulting in increased lipid storage and loss of mitochondrial thermogenesis.</p> <p>{ECO:0000269   PubMed:26287746}.</p> | adipose tissue development [GO:0060612]; DNA dealkylation involved in DNA repair [GO:0006307]; DNA demethylation [GO:0080111]; oxidative demethylation [GO:0070989]; oxidative single-stranded DNA demethylation [GO:0035552]; oxidative single-stranded RNA demethylation [GO:0035553]; regulation of brown fat cell differentiation [GO:0090335]; regulation of lipid storage [GO:0010883]; regulation of multicellular organism growth [GO:0040014]; regulation of respiratory system process [GO:0044065]; regulation of white fat cell proliferation [GO:0070350]; RNA repair [GO:0042245]; temperature homeostasis [GO:0001659] |

|    |        |             |                   |                                                                                                                                             |                |             |                      |          |                                   |    |                                                                                                                                                                                                                                                                                                                                                                                                                                                                                                                                                                                                                                                                                                                                                                                                                                                                                                                                                                                                                                                                                                                                                                                                                                                                                                                                                                                                                                                                                                                                                                                                                                                                                                                                                                                                                                                                                                                                                                                                                                        |                                                                                                                                |
|----|--------|-------------|-------------------|---------------------------------------------------------------------------------------------------------------------------------------------|----------------|-------------|----------------------|----------|-----------------------------------|----|----------------------------------------------------------------------------------------------------------------------------------------------------------------------------------------------------------------------------------------------------------------------------------------------------------------------------------------------------------------------------------------------------------------------------------------------------------------------------------------------------------------------------------------------------------------------------------------------------------------------------------------------------------------------------------------------------------------------------------------------------------------------------------------------------------------------------------------------------------------------------------------------------------------------------------------------------------------------------------------------------------------------------------------------------------------------------------------------------------------------------------------------------------------------------------------------------------------------------------------------------------------------------------------------------------------------------------------------------------------------------------------------------------------------------------------------------------------------------------------------------------------------------------------------------------------------------------------------------------------------------------------------------------------------------------------------------------------------------------------------------------------------------------------------------------------------------------------------------------------------------------------------------------------------------------------------------------------------------------------------------------------------------------------|--------------------------------------------------------------------------------------------------------------------------------|
| 35 | P07902 | GALT_HUMAN  | GALT              | Galactose-1-phosphate uridylyltransferase (Gal-1-P uridylyltransferase) (EC 2.7.7.12) (UDP-glucose--hexose-1-phosphate uridylyltransferase) | H301-H319-H321 | 1 Fe cation | Catalytic            | 2.7.7.12 | Unknown                           | No | DISEASE: Galactosemia (GALCT) [MIM:230400]: Inherited disorder of galactose metabolism that causes jaundice, cataracts, and mental retardation. {ECO:0000269 PubMed:10220154, ECO:0000269 PubMed:11754113, ECO:0000269 PubMed:11919338, ECO:0000269 PubMed:1373122, ECO:0000269 PubMed:1427861, ECO:0000269 PubMed:15841485, ECO:0000269 PubMed:1610789, ECO:0000269 PubMed:17041746, ECO:0000269 PubMed:17876724, ECO:0000269 PubMed:18956253, ECO:0000269 PubMed:1897530, ECO:0000269 PubMed:2011574, ECO:0000269 PubMed:22461411, ECO:0000269 PubMed:23022339, ECO:0000269 PubMed:25592817, ECO:0000269 PubMed:25614870, ECO:0000269 PubMed:7550229, ECO:0000269 PubMed:7887416, ECO:0000269 PubMed:7887417, ECO:0000269 PubMed:8112740, ECO:0000269 PubMed:8499924, ECO:0000269 PubMed:8598637, ECO:0000269 PubMed:8741038, ECO:0000269 PubMed:8869397,                                                                                                                                                                                                                                                                                                                                                                                                                                                                                                                                                                                                                                                                                                                                                                                                                                                                                                                                                                                                                                                                                                                                                                            | galactose catabolic process [GO:0019388]; galactose metabolic process [GO:0006012]; UDP-glucose catabolic process [GO:0006258] |
| 36 | P09211 | GSTP1_HUMAN | GSTP1 FAEE53 GST3 | Glutathione S-transferase P (EC 2.5.1.18) (GST class-pi) (GSTP1-1)                                                                          | Y8             | 1 Fe cation | Regulation catalysis | 2.5.1.18 | Cytoplasm, Mitochondrion, Nucleus | No | animal organ regeneration [GO:0031100]; cellular response to cell-matrix adhesion [GO:0071460]; cellular response to epidermal growth factor stimulus [GO:0071364]; cellular response to glucocorticoid stimulus [GO:0071385]; cellular response to insulin stimulus [GO:0032869]; cellular response to lipopolysaccharide [GO:0071222]; central nervous system development [GO:0007417]; common myeloid progenitor cell proliferation [GO:0035726]; glutathione derivative biosynthetic process [GO:1901687]; glutathione metabolic process [GO:0006749]; linoleic acid metabolic process [GO:0043651]; negative regulation of acute inflammatory response [GO:0002674]; negative regulation of apoptotic process [GO:0043066]; negative regulation of biosynthetic process [GO:0009890]; negative regulation of ERK1 and ERK2 cascade [GO:0070373]; negative regulation of extrinsic apoptotic signaling pathway [GO:2001237]; negative regulation of fibroblast proliferation [GO:0048147]; negative regulation of I-kappaB kinase/NF-kappaB signaling [GO:0043124]; negative regulation of interleukin-1 beta production [GO:0032691]; negative regulation of JUN kinase activity [GO:0043508]; negative regulation of leukocyte proliferation [GO:0070664]; negative regulation of MAPK cascade [GO:0043409]; negative regulation of MAP kinase activity [GO:0043407]; negative regulation of monocyte chemotactic protein-1 production [GO:0071638]; negative regulation of nitric-oxide synthase biosynthetic process [GO:0051771]; negative regulation of protein kinase activity [GO:0006469]; negative regulation of smooth muscle cell chemotaxis [GO:0071672]; negative regulation of stress-activated MAPK cascade [GO:0032873]; negative regulation of tumor necrosis factor-mediated signaling pathway [GO:0010804]; negative regulation of tumor necrosis factor production [GO:0032720]; negative regulation of vascular smooth muscle cell proliferation [GO:1904706]; neutrophil degranulation [GO:0043312]; nitric |                                                                                                                                |

|    |        |             |               |                                                                                                                              |                   |             |                          |           |               |     |                                                                                                                                                                                                                                                                                                                                                                                                                                                                                                                                                                                                                                                                                                                                                                                                                                                                                                                                                                                                                                                                                                          |                                                                                                                                                                                                                                                                                                                                                                                                                                                                                                                                              |
|----|--------|-------------|---------------|------------------------------------------------------------------------------------------------------------------------------|-------------------|-------------|--------------------------|-----------|---------------|-----|----------------------------------------------------------------------------------------------------------------------------------------------------------------------------------------------------------------------------------------------------------------------------------------------------------------------------------------------------------------------------------------------------------------------------------------------------------------------------------------------------------------------------------------------------------------------------------------------------------------------------------------------------------------------------------------------------------------------------------------------------------------------------------------------------------------------------------------------------------------------------------------------------------------------------------------------------------------------------------------------------------------------------------------------------------------------------------------------------------|----------------------------------------------------------------------------------------------------------------------------------------------------------------------------------------------------------------------------------------------------------------------------------------------------------------------------------------------------------------------------------------------------------------------------------------------------------------------------------------------------------------------------------------------|
| 37 | O43593 | HAIR_HUMAN  | HR            | Lysine-specific demethylase hairless (EC 1.14.11.-)                                                                          | C1007-E1009-H1125 | 1 Fe cation | Catalytic                | 1.14.11.- | Nucleus       | No  | DISEASE: Alopecia universalis congenita (ALUNC) [MIM:203655]: A rare disorder characterized by loss of hair from the entire body. No hair are present in hair follicles on skin biopsy. {ECO:0000269 PubMed:12406339, ECO:0000269 PubMed:24334705, ECO:0000269 PubMed:9445480, ECO:0000269 PubMed:9736769}. Note=The disease is caused by mutations affecting the gene represented in this entry.; DISEASE: Atrichia with papular lesions (APL) [MIM:209500]: An autosomal recessive disease characterized by papillary lesions over most of the body and almost complete absence of hair. Note=The disease is caused by mutations affecting the gene represented in this entry.; DISEASE: Hypotrichosis 4 (HYPT4) [MIM:146550]: An autosomal dominant condition characterized by reduced amount of hair, alopecia, little or no eyebrows, eyelashes or body hair, and coarse, wiry, twisted hair in early childhood. {ECO:0000269 PubMed:19122663, ECO:0000269 PubMed:24961381}. Note=The disease is caused by mutations affecting the gene represented in this entry.                                  | histone H3-K9 demethylation [GO:003169]; negative regulation of transcription, DNA-templated [GO:0045892]; regulation of transcription, DNA-templated [GO:0006355]; transcription, DNA-templated [GO:0006351]                                                                                                                                                                                                                                                                                                                                |
| 38 | Q96EW2 | HBAP1_HUMAN | HSPBAP1 PASS1 | HSPB1-associated protein 1 (27 kDa heat shock protein-associated protein 1) (Protein associated with small stress protein 1) | H175-D177-H257    | 1 Fe cation | Catalytic                |           | Cytoplasm     | No  | DISEASE: Note=A chromosomal aberration involving HSPBAP1 has been found in a family with renal carcinoma (PubMed:12939738). Translocation t(2;3)(q35;q21) with the putative pseudogene DIRC3 (PubMed:12939738). Produces a hybrid mRNA encoding a truncated HSPBAP1 lacking the first 36 amino acids (PubMed:12939738). {ECO:0000269 PubMed:12939738}.                                                                                                                                                                                                                                                                                                                                                                                                                                                                                                                                                                                                                                                                                                                                                   |                                                                                                                                                                                                                                                                                                                                                                                                                                                                                                                                              |
| 39 | P22830 | HEMH_HUMAN  | FECH          | Ferrochelatase, mitochondrial (EC 4.99.1.1) (Heme synthase) (Protoheme ferro-lyase)                                          | H263-E343         | 1 Fe cation | Substrate - biosynthesis | 4.99.1.1  | Mitochondrion | Yes | DISEASE: Erythropoietic protoporphyria (EPP) [MIM:177000]: A form of porphyria. Porphyrias are inherited defects in the biosynthesis of heme, resulting in the accumulation and increased excretion of porphyrins or porphyrin precursors. They are classified as erythropoietic or hepatic, depending on whether the enzyme deficiency occurs in red blood cells or in the liver. Erythropoietic protoporphyria is marked by excessive protoporphyrin in erythrocytes, plasma, liver and feces, and by widely varying photosensitive skin changes ranging from a burning or pruritic sensation to erythema, edema and wheals. {ECO:0000269 PubMed:10942404, ECO:0000269 PubMed:11375302, ECO:0000269 PubMed:12063482, ECO:0000269 PubMed:12601550, ECO:0000269 PubMed:1376018, ECO:0000269 PubMed:15286165, ECO:0000269 PubMed:17196862, ECO:0000269 PubMed:1755842, ECO:0000269 PubMed:7910885, ECO:0000269 PubMed:8757534, ECO:0000269 PubMed:9211198, ECO:0000269 PubMed:9585598, ECO:0000269 PubMed:9740232}. Note=The disease is caused by mutations affecting the gene represented in this entry. | cellular response to dexamethasone stimulus [GO:0071549]; generation of precursor metabolites and energy [GO:0006091]; heme biosynthetic process [GO:0006783]; protoporphyrinogen IX metabolic process [GO:0046501]; response to arsenic-containing substance [GO:0046685]; response to drug [GO:0042493]; response to ethanol [GO:0045471]; response to insecticide [GO:0017085]; response to lead ion [GO:0010288]; response to light stimulus [GO:0009416]; response to methylmercury [GO:0051597]; response to platinum ion [GO:0070541] |

|    |        |             |                                |                                                                                                                                                                           |                     |             |                        |                        |                     |    |                                                                                                                                                                                                                                                                                                                                                                                                                                                                                                                                                                                                                                                                                                                                                                                                                                          |                                                                                                                                                                                                                                                                                                                                                                                                                                                                                                                                                                                                                                                                                                                                                                                                                                                                                                                                                                                                                                                                                                                                                                                                                                                                                                                                                                                                                                                                                                                                                                                                                                                                                                                                                                           |
|----|--------|-------------|--------------------------------|---------------------------------------------------------------------------------------------------------------------------------------------------------------------------|---------------------|-------------|------------------------|------------------------|---------------------|----|------------------------------------------------------------------------------------------------------------------------------------------------------------------------------------------------------------------------------------------------------------------------------------------------------------------------------------------------------------------------------------------------------------------------------------------------------------------------------------------------------------------------------------------------------------------------------------------------------------------------------------------------------------------------------------------------------------------------------------------------------------------------------------------------------------------------------------------|---------------------------------------------------------------------------------------------------------------------------------------------------------------------------------------------------------------------------------------------------------------------------------------------------------------------------------------------------------------------------------------------------------------------------------------------------------------------------------------------------------------------------------------------------------------------------------------------------------------------------------------------------------------------------------------------------------------------------------------------------------------------------------------------------------------------------------------------------------------------------------------------------------------------------------------------------------------------------------------------------------------------------------------------------------------------------------------------------------------------------------------------------------------------------------------------------------------------------------------------------------------------------------------------------------------------------------------------------------------------------------------------------------------------------------------------------------------------------------------------------------------------------------------------------------------------------------------------------------------------------------------------------------------------------------------------------------------------------------------------------------------------------|
| 40 | P81172 | HEPC_HUMAN  | HAMP HEPC LEAP1 UNQ487/PRO1003 | Hepcidin (Liver-expressed antimicrobial peptide 1) (LEAP-1) (Putative liver tumor regressor) (PLTR) [Cleaved into: Hepcidin-25 (Hepc25); Hepcidin-20 (Hepc20)]            | Unknown             | Unknown     | Substrate - regulation |                        | Extracellular space | No | DISEASE: Hemochromatosis 2B (HFE2B) [MIM:613313]: A juvenile form of hemochromatosis, a disorder of iron metabolism with excess deposition of iron in a variety of organs leading to their failure, bronze skin pigmentation, hepatic cirrhosis, arthropathy and diabetes. The most common symptoms of juvenile hemochromatosis at presentation are hypogonadism and cardiomyopathy. {ECO:0000269   PubMed:12915468, ECO:0000269   PubMed:14630809, ECO:0000269   PubMed:14633868, ECO:0000269   PubMed:14670915, ECO:0000269   PubMed:15099344}. Note=The disease is caused by mutations affecting the gene represented in this entry.                                                                                                                                                                                                  | acute-phase response [GO:0006953]; aging [GO:0007568]; antimicrobial humoral immune response mediated by antimicrobial peptide [GO:0061844]; cellular iron ion homeostasis [GO:0006879]; cellular response to bile acid [GO:1903413]; cellular response to interleukin-6 [GO:0071354]; cellular response to lipopolysaccharide [GO:0071222]; cellular response to tumor necrosis factor [GO:0071356]; cellular response to X-ray [GO:0071481]; defense response to bacterium [GO:0042742]; defense response to fungus [GO:0050832]; defense response to Gram-negative bacterium [GO:0050829]; defense response to Gram-positive bacterium [GO:0050830]; immune response [GO:0006955]; killing of cells of other organism [GO:0031640]; liver regeneration [GO:0097421]; multicellular organismal iron ion homeostasis [GO:0060586]; negative regulation of ferrous iron export [GO:1904039]; negative regulation of intestinal absorption [GO:1904479]; negative regulation of ion transmembrane transporter activity [GO:0032413]; negative regulation of iron channel activity [GO:1904255]; negative regulation of iron ion transmembrane transport [GO:0034760]; negative regulation of transcription by RNA polymerase II [GO:0000122]; positive regulation of cell growth involved in cardiac muscle cell development [GO:0061051]; positive regulation of protein polyubiquitination [GO:1902916]; positive regulation of receptor catabolic process [GO:2000646]; positive regulation of receptor internalization [GO:0002092]; response to erythropoietin [GO:0036017]; response to ethanol [GO:0045471]; response to iron ion [GO:0010039]; response to iron ion starvation [GO:1990641]; response to vitamin A [GO:0033189]; response to zinc ion [GO:0010043] |
| 41 | Q93099 | HGD_HUMAN   | HGD HGO                        | Homogentisate 1,2-dioxygenase (EC 1.13.11.5) (Homogentisate oxygenase) (Homogentisic acid oxidase) (Homogentisicase)                                                      | H335-E341-H371      | 1 Fe cation | Catalytic              | 1.13.11.5              | Unknown             | No | DISEASE: Alkaptonuria (AKU) [MIM:203500]: An autosomal recessive error of metabolism characterized by an increase in the level of homogentisic acid. The clinical manifestations are urine that turns dark on standing and alkalization, black ochronotic pigmentation of cartilage and collagenous tissues, and spine arthritis. {ECO:0000269   PubMed:10205262, ECO:0000269   PubMed:10340975, ECO:0000269   PubMed:10482952, ECO:0000269   PubMed:10594001, ECO:0000269   PubMed:19862842, ECO:0000269   PubMed:21437689, ECO:0000269   PubMed:23353776, ECO:0000269   PubMed:23430897, ECO:0000269   PubMed:25681086, ECO:0000269   PubMed:8782815, ECO:0000269   PubMed:9154114, ECO:0000269   PubMed:9529363, ECO:0000269   PubMed:9630082}. Note=The disease is caused by mutations affecting the gene represented in this entry. | L-phenylalanine catabolic process [GO:0006559]; tyrosine catabolic process [GO:0006572]                                                                                                                                                                                                                                                                                                                                                                                                                                                                                                                                                                                                                                                                                                                                                                                                                                                                                                                                                                                                                                                                                                                                                                                                                                                                                                                                                                                                                                                                                                                                                                                                                                                                                   |
| 42 | Q9NWT6 | HIF1N_HUMAN | HIF1AN FIH1                    | Hypoxia-inducible factor 1-alpha inhibitor (EC 1.14.11.30) (EC 1.14.11.n4) (Factor inhibiting HIF-1) (FIH-1) (Hypoxia-inducible factor asparagine hydroxylase)            | H199-D201-H279      | 1 Fe cation | Catalytic              | 1.14.11.30; 1.14.11.n4 | Cytoplasm, Nucleus  | No |                                                                                                                                                                                                                                                                                                                                                                                                                                                                                                                                                                                                                                                                                                                                                                                                                                          | negative regulation of Notch signaling pathway [GO:0045746]; negative regulation of transcription from RNA polymerase II promoter in response to hypoxia [GO:0061428]; oxidation-reduction process [GO:0055114]; peptidyl-asparagine hydroxylation [GO:0042265]; peptidyl-aspartic acid hydroxylation [GO:0042264]; peptidyl-histidine hydroxylation [GO:0036138]; positive regulation of myoblast differentiation [GO:0045663]; positive regulation of vasculogenesis [GO:2001214]; regulation of transcription from RNA polymerase II promoter in response to hypoxia [GO:0061418]; transcription, DNA-templated [GO:0006351]                                                                                                                                                                                                                                                                                                                                                                                                                                                                                                                                                                                                                                                                                                                                                                                                                                                                                                                                                                                                                                                                                                                                           |
| 43 | Q8IWW8 | HOT_HUMAN   | ADHFE1 HMFT2263                | Hydroxyacid-oxoacid transhydrogenase, mitochondrial (HOT) (EC 1.1.99.24) (Alcohol dehydrogenase iron-containing protein 1) (ADHFe1) (Fe-containing alcohol dehydrogenase) | D242-H246-H330-H357 | 1 Fe cation | Catalytic              | 1.1.99.24              | Mitochondrion       | No |                                                                                                                                                                                                                                                                                                                                                                                                                                                                                                                                                                                                                                                                                                                                                                                                                                          | 2-oxoglutarate metabolic process [GO:0006103]; molecular hydrogen transport [GO:0015993]                                                                                                                                                                                                                                                                                                                                                                                                                                                                                                                                                                                                                                                                                                                                                                                                                                                                                                                                                                                                                                                                                                                                                                                                                                                                                                                                                                                                                                                                                                                                                                                                                                                                                  |
| 44 | Q96IR7 | HPDL_HUMAN  | HPDL GLOXD1                    | 4-hydroxyphenylpyruvate dioxygenase-like protein (EC 1.13.-.-) (Glyoxalase domain-containing protein 1)                                                                   | H163-H258-E339      | 1 Fe cation | Catalytic              | 1.13.-.-               | Unknown             | No |                                                                                                                                                                                                                                                                                                                                                                                                                                                                                                                                                                                                                                                                                                                                                                                                                                          | aromatic amino acid family metabolic process [GO:0009072]                                                                                                                                                                                                                                                                                                                                                                                                                                                                                                                                                                                                                                                                                                                                                                                                                                                                                                                                                                                                                                                                                                                                                                                                                                                                                                                                                                                                                                                                                                                                                                                                                                                                                                                 |



|    |        |             |                                         |                                                                                                                                                                                                                                                                                                          |                     |                   |                      |            |         |    |                                                                                                                                                                                                                                                                                                                                                                                                                                                                                                                                                                                                                                                                                                                                 |                                                                                                                                                                                                                                                                                                                                                                                                                                                                                                                                                                                                                                                                                                                                                                                                  |
|----|--------|-------------|-----------------------------------------|----------------------------------------------------------------------------------------------------------------------------------------------------------------------------------------------------------------------------------------------------------------------------------------------------------|---------------------|-------------------|----------------------|------------|---------|----|---------------------------------------------------------------------------------------------------------------------------------------------------------------------------------------------------------------------------------------------------------------------------------------------------------------------------------------------------------------------------------------------------------------------------------------------------------------------------------------------------------------------------------------------------------------------------------------------------------------------------------------------------------------------------------------------------------------------------------|--------------------------------------------------------------------------------------------------------------------------------------------------------------------------------------------------------------------------------------------------------------------------------------------------------------------------------------------------------------------------------------------------------------------------------------------------------------------------------------------------------------------------------------------------------------------------------------------------------------------------------------------------------------------------------------------------------------------------------------------------------------------------------------------------|
| 45 | P32754 | HPPD_HUMAN  | HPD PPD                                 | 4-hydroxyphenylpyruvate dioxygenase (EC 1.13.11.27) (4-hydroxyphenylpyruvic acid oxidase) (4HPPD) (HPD) (HPPDase)                                                                                                                                                                                        | H183-H266-E349      | 1 Fe cation       | Catalytic            | 1.13.11.27 | Unknown | No | DISEASE: Tyrosinemia 3 (TYRSN3) [MIM:276710]: An inborn error of metabolism characterized by elevations of tyrosine in the blood and urine, seizures and mild mental retardation. [ECO:0000269] [PubMed:10942115, ECO:0000269] [PubMed:11073718]. Note=The disease is caused by mutations affecting the gene represented in this entry.; DISEASE: Hawkinsinuria (HAWK) [MIM:140350]: An inborn error of tyrosine metabolism characterized by failure to thrive, persistent metabolic acidosis, fine and sparse hair, and excretion of the unusual cyclic amino acid metabolite, hawkinsin, in the urine. [ECO:0000269] [PubMed:11073718]. Note=The disease is caused by mutations affecting the gene represented in this entry. | L-phenylalanine catabolic process [GO:0006559]; tyrosine catabolic process [GO:0006572]                                                                                                                                                                                                                                                                                                                                                                                                                                                                                                                                                                                                                                                                                                          |
| 46 | Q96NU7 | HUTL_HUMAN  | AMDHD1 HMFT1272                         | Probable imidazolonepropionase (EC 3.5.2.7) (Amidohydrolase domain-containing protein 1)                                                                                                                                                                                                                 | H87-H89-H260-D334   | 1 Fe or Zn cation | Catalytic - no redox | 3.5.2.7    | Unknown | No |                                                                                                                                                                                                                                                                                                                                                                                                                                                                                                                                                                                                                                                                                                                                 | histidine catabolic process [GO:0006548]; histidine catabolic process to glutamate and formamide [GO:0019556]; histidine catabolic process to glutamate and formate [GO:0019557]                                                                                                                                                                                                                                                                                                                                                                                                                                                                                                                                                                                                                 |
| 47 | Q15652 | JHD2C_HUMAN | JMJD1C JHDM2C KIAA1380 TRIP8            | Probable JmjC domain-containing histone demethylation protein 2C (EC 1.14.11.-) (Jumonji domain-containing protein 1C) (Thyroid receptor-interacting protein 8) (TR-interacting protein 8) (TRIP-8)                                                                                                      | H2336-E2338-H2466   | 1 Fe cation       | Catalytic            | 1.14.11.-  | Nucleus | No |                                                                                                                                                                                                                                                                                                                                                                                                                                                                                                                                                                                                                                                                                                                                 | blood coagulation [GO:0007596]; histone H3-K9 demethylation [GO:0033169]; regulation of transcription, DNA-templated [GO:0006355]; transcription, DNA-templated [GO:0006351]                                                                                                                                                                                                                                                                                                                                                                                                                                                                                                                                                                                                                     |
| 48 | Q9H9V9 | JMJD4_HUMAN | JMJD4                                   | JmjC domain-containing protein 4 (Jumonji domain-containing protein 4)                                                                                                                                                                                                                                   | H235-D237-H315      | 1 Fe cation       | Catalytic            |            | Unknown | No |                                                                                                                                                                                                                                                                                                                                                                                                                                                                                                                                                                                                                                                                                                                                 |                                                                                                                                                                                                                                                                                                                                                                                                                                                                                                                                                                                                                                                                                                                                                                                                  |
| 49 | Q6NYC1 | JMJD6_HUMAN | JMJD6 KIAA0585 PTDSR                    | Bifunctional arginine demethylase and lysyl-hydroxylase JMJD6 (EC 1.14.11.-) (Histone arginine demethylase JMJD6) (JmjC domain-containing protein 6) (Jumonji domain-containing protein 6) (Lysyl-hydroxylase JMJD6) (Peptidyl-lysine 5-dioxygenase JMJD6) (Phosphatidylserine receptor) (Protein PTDSR) | H187-D189-H273      | 1 Fe cation       | Catalytic            | 1.14.11.-  | Nucleus | No |                                                                                                                                                                                                                                                                                                                                                                                                                                                                                                                                                                                                                                                                                                                                 | cell surface receptor signaling pathway [GO:0007166]; erythrocyte development [GO:0048821]; heart development [GO:0007507]; histone H3-R2 demethylation [GO:0070078]; histone H4-R3 demethylation [GO:0070079]; kidney development [GO:0001822]; lung development [GO:0030324]; macrophage activation [GO:0042116]; mRNA processing [GO:0006397]; peptidyl-lysine hydroxylation to 5-hydroxy-L-lysine [GO:0018395]; recognition of apoptotic cell [GO:0043654]; regulation of mRNA splicing, via spliceosome [GO:0048024]; regulation of transcription, DNA-templated [GO:0006355]; retina development in camera-type eye [GO:0060041]; RNA splicing [GO:0008380]; sprouting angiogenesis [GO:0002040]; T cell differentiation in thymus [GO:0033077]; transcription, DNA-templated [GO:0006351] |
| 50 | POC870 | JMJD7_HUMAN | JMJD7                                   | JmjC domain-containing protein 7 (Jumonji domain-containing protein 7)                                                                                                                                                                                                                                   | H178-D180-H277      | 1 Fe cation       | Catalytic            |            | Unknown | No |                                                                                                                                                                                                                                                                                                                                                                                                                                                                                                                                                                                                                                                                                                                                 |                                                                                                                                                                                                                                                                                                                                                                                                                                                                                                                                                                                                                                                                                                                                                                                                  |
| 51 | Q96S16 | JMJD8_HUMAN | JMJD8 C16orf20 PP14397                  | JmjC domain-containing protein 8 (Jumonji domain-containing protein 8)                                                                                                                                                                                                                                   | H249-H251-H318      | 1 Fe cation       | Catalytic            |            | Unknown | No |                                                                                                                                                                                                                                                                                                                                                                                                                                                                                                                                                                                                                                                                                                                                 |                                                                                                                                                                                                                                                                                                                                                                                                                                                                                                                                                                                                                                                                                                                                                                                                  |
| 52 | Q9P272 | K1456_HUMAN | KIAA1456 C8orf79                        | Probable tRNA methyltransferase 9-like protein (TRM9L) (EC 2.1.1.-)                                                                                                                                                                                                                                      | H112                | 1 Fe cation       | Catalytic            | 2.1.1.-    | Unknown | No |                                                                                                                                                                                                                                                                                                                                                                                                                                                                                                                                                                                                                                                                                                                                 | tRNA modification [GO:0006400]; tRNA wobble uridine modification [GO:0002098]                                                                                                                                                                                                                                                                                                                                                                                                                                                                                                                                                                                                                                                                                                                    |
| 53 | Q9Y2K7 | KDM2A_HUMAN | KDM2A CXXC8 FBL7 FBXL11 JHDM1A KIAA1004 | Lysine-specific demethylase 2A (EC 1.14.11.27) (CXXC-type zinc finger protein 8) (F-box and leucine-rich repeat protein 11) (F-box protein FBL7) (F-box protein Lilina) (F-box/LRR-repeat protein 11) (JmjC domain-containing histone demethylation protein 1A) (Histone-H3)-lysine-36 demethylase 1A)   | H212-D214-Y222-H284 | 1 Fe cation       | Catalytic            | 1.14.11.27 | Nucleus | No |                                                                                                                                                                                                                                                                                                                                                                                                                                                                                                                                                                                                                                                                                                                                 | double-strand break repair via nonhomologous end joining [GO:0006303]; histone H3-K36 demethylation [GO:0070544]; regulation of transcription, DNA-templated [GO:0006355]; transcription, DNA-templated [GO:0006351]                                                                                                                                                                                                                                                                                                                                                                                                                                                                                                                                                                             |

|    |        |             |                                         |                                                                                                                                                                                                                                                                                                                                                                                                                |                   |             |           |            |                    |    |                                                                                                                                                                                                                                                                                                                                                                                                                                                                                                                                                                                                                                                                                                                                                                                                                                                                                 |
|----|--------|-------------|-----------------------------------------|----------------------------------------------------------------------------------------------------------------------------------------------------------------------------------------------------------------------------------------------------------------------------------------------------------------------------------------------------------------------------------------------------------------|-------------------|-------------|-----------|------------|--------------------|----|---------------------------------------------------------------------------------------------------------------------------------------------------------------------------------------------------------------------------------------------------------------------------------------------------------------------------------------------------------------------------------------------------------------------------------------------------------------------------------------------------------------------------------------------------------------------------------------------------------------------------------------------------------------------------------------------------------------------------------------------------------------------------------------------------------------------------------------------------------------------------------|
| 54 | Q8NHM5 | KDM2B_HUMAN | KDM2B CXXC2 FBL10 FBXL10 JHDM1B PCCX2   | Lysine-specific demethylase 2B (EC 1.14.11.27) (CXXC-type zinc finger protein 2) (F-box and leucine-rich repeat protein 10) (F-box protein FBL10) (F-box/LRR-repeat protein 10) (JmjC domain-containing histone demethylase protein 1B) (Jumonji domain-containing EMSY-interactor methyltransferase motif protein) (Protein JEMMA) (Protein-containing CXXC domain 2) ([Histone-H3]-lysine-36 demethylase 1B) | H242-D244-H314    | 1 Fe cation | Catalytic | 1.14.11.27 | Nucleus            | No | embryonic camera-type eye morphogenesis [GO:0048596]; forebrain development [GO:0030900]; fourth ventricle development [GO:0021592]; hindbrain development [GO:0030902]; histone H2A monoubiquitination [GO:0035518]; initiation of neural tube closure [GO:0021993]; lateral ventricle development [GO:0021670]; midbrain development [GO:0030901]; midbrain-hindbrain boundary morphogenesis [GO:0021555]; negative regulation of neural precursor cell proliferation [GO:2000178]; negative regulation of neuron apoptotic process [GO:0043524]; negative regulation of transcription from RNA polymerase II promoter [GO:0000122]; positive regulation of cell growth [GO:0030307]; positive regulation of stem cell population maintenance [GO:1902459]; spermatogenesis [GO:0007283]; third ventricle development [GO:0021678]; transcription, DNA-templated [GO:0006351] |
| 55 | Q9Y4C1 | KDM3A_HUMAN | KDM3A JHDM2A JMJD1 JMJD1A KIAA0742 TSGA | Lysine-specific demethylase 3A (EC 1.14.11.-) (JmjC domain-containing histone demethylase protein 2A) (Jumonji domain-containing protein 1A)                                                                                                                                                                                                                                                                   | H1120-D1122-H1249 | 1 Fe cation | Catalytic | 1.14.11.-  | Cytoplasm, Nucleus | No | androgen receptor signaling pathway [GO:0030521]; formaldehyde biosynthetic process [GO:0046293]; histone H3-K9 demethylation [GO:0033169]; histone H3-K9 dimethylation [GO:0036123]; hormone-mediated signaling pathway [GO:0009755]; negative regulation of histone H3-K9 methylation [GO:0051573]; positive regulation of transcription, DNA-templated [GO:0045893]; positive regulation of transcription from RNA polymerase II promoter [GO:0045944]; regulation of stem cell differentiation [GO:2000736]; regulation of stem cell population maintenance [GO:2000036]; spermatid nucleus elongation [GO:0007290]; transcription, DNA-templated [GO:0006351]                                                                                                                                                                                                              |
| 56 | Q7LBC6 | KDM3B_HUMAN | KDM3B C5orf7 JHDM2B JMJD1B KIAA1082     | Lysine-specific demethylase 3B (EC 1.14.11.-) (JmjC domain-containing histone demethylase protein 2B) (Jumonji domain-containing protein 1B) (Nuclear protein 5qNCA)                                                                                                                                                                                                                                           | H1604-H1689       | 1 Fe cation | Catalytic | 1.14.11.-  | Nucleus            | No | histone H3-K9 demethylation [GO:0033169]; regulation of transcription, DNA-templated [GO:0006355]; response to cisplatin [GO:0072718]; transcription, DNA-templated [GO:0006351]                                                                                                                                                                                                                                                                                                                                                                                                                                                                                                                                                                                                                                                                                                |
| 57 | Q7S164 | KDM4A_HUMAN | KDM4A JHDM3A JMJD2 JMJD2A KIAA0677      | Lysine-specific demethylase 4A (EC 1.14.11.-) (JmjC domain-containing histone demethylase protein 3A) (Jumonji domain-containing protein 2A)                                                                                                                                                                                                                                                                   | H188-E190-H276    | 1 Fe cation | Catalytic | 1.14.11.-  | Nucleus            | No | cardiac muscle hypertrophy in response to stress [GO:0014898]; histone demethylation [GO:0016577]; negative regulation of astrocyte differentiation [GO:0048712]; negative regulation of autophagy [GO:0010507]; negative regulation of cell death [GO:0060548]; negative regulation of gene expression [GO:0010629]; negative regulation of histone H3-K9 trimethylation [GO:1900113]; negative regulation of transcription, DNA-templated [GO:0045892]; positive regulation of gene expression [GO:0010628]; positive regulation of neuron differentiation [GO:0045666]; response to nutrient levels [GO:0031667]; transcription, DNA-templated [GO:0006351]; viral process [GO:0016032]                                                                                                                                                                                      |
| 58 | Q94953 | KDM4B_HUMAN | KDM4B JHDM3B JMJD2B KIAA0876            | Lysine-specific demethylase 4B (EC 1.14.11.-) (JmjC domain-containing histone demethylase protein 3B) (Jumonji domain-containing protein 2B)                                                                                                                                                                                                                                                                   | H189-E191-H277    | 1 Fe cation | Catalytic | 1.14.11.-  | Nucleus            | No | regulation of transcription, DNA-templated [GO:0006355]; transcription, DNA-templated [GO:0006351]                                                                                                                                                                                                                                                                                                                                                                                                                                                                                                                                                                                                                                                                                                                                                                              |
| 59 | Q9H3R0 | KDM4C_HUMAN | KDM4C GASC1 JHDM3C JMJD2C KIAA0780      | Lysine-specific demethylase 4C (EC 1.14.11.-) (Gene amplified in squamous cell carcinoma 1 protein) (GASC-1 protein) (JmjC domain-containing histone demethylase protein 3C) (Jumonji domain-containing protein 2C)                                                                                                                                                                                            | H190-E192-H278    | 1 Fe cation | Catalytic | 1.14.11.-  | Nucleus            | No | blastocyst formation [GO:0001825]; histone H3-K9 demethylation [GO:0033169]; negative regulation of histone H3-K9 trimethylation [GO:1900113]; positive regulation of cell proliferation [GO:0008284]; positive regulation of gene expression [GO:0010628]; positive regulation of neuron differentiation [GO:0045666]; regulation of stem cell differentiation [GO:2000736]; regulation of stem cell population maintenance [GO:2000036]; regulation of transcription from RNA polymerase II promoter [GO:0006357]; transcription, DNA-templated [GO:0006351]                                                                                                                                                                                                                                                                                                                  |
| 60 | Q6B0I6 | KDM4D_HUMAN | KDM4D JHDM3D JMJD2D                     | Lysine-specific demethylase 4D (EC 1.14.11.-) (JmjC domain-containing histone demethylase protein 3D) (Jumonji domain-containing protein 2D)                                                                                                                                                                                                                                                                   | H192-E194-H280    | 1 Fe cation | Catalytic | 1.14.11.-  | Nucleus            | No | cellular response to ionizing radiation [GO:0071479]; double-strand break repair via homologous recombination [GO:0000724]; histone H3-K9 demethylation [GO:0033169]; negative regulation of histone H3-K9 trimethylation [GO:1900113]; positive regulation of chromatin binding [GO:0035563]; positive regulation of double-strand break repair via nonhomologous end joining [GO:2001034]; regulation of protein phosphorylation [GO:0001932]; regulation of transcription, DNA-templated [GO:0006355]; transcription, DNA-templated [GO:0006351]                                                                                                                                                                                                                                                                                                                             |

|    |        |             |                                    |                                                                                                                                                                                                                          |                   |             |           |           |                        |    |                                                                                                                                                                                                                                                                                                                                                                                                                                                                                                                                                                                                                                                                                                                                                  |                                                                                                                                                                                                                                                                                                                                                                                                                                                                                                                                                                                                                                                                                                                                                                                                                                                    |
|----|--------|-------------|------------------------------------|--------------------------------------------------------------------------------------------------------------------------------------------------------------------------------------------------------------------------|-------------------|-------------|-----------|-----------|------------------------|----|--------------------------------------------------------------------------------------------------------------------------------------------------------------------------------------------------------------------------------------------------------------------------------------------------------------------------------------------------------------------------------------------------------------------------------------------------------------------------------------------------------------------------------------------------------------------------------------------------------------------------------------------------------------------------------------------------------------------------------------------------|----------------------------------------------------------------------------------------------------------------------------------------------------------------------------------------------------------------------------------------------------------------------------------------------------------------------------------------------------------------------------------------------------------------------------------------------------------------------------------------------------------------------------------------------------------------------------------------------------------------------------------------------------------------------------------------------------------------------------------------------------------------------------------------------------------------------------------------------------|
| 61 | B2RXH2 | KDM4E_HUMAN | KDM4E KDM4DL                       | Lysine-specific demethylase 4E (EC 1.14.11.-) (KDM4D-like protein) (Lysine-specific demethylase 4D-like)                                                                                                                 | H189-E191-H277    | 1 Fe cation | Catalytic | 1.14.11.- | Nucleus                | No |                                                                                                                                                                                                                                                                                                                                                                                                                                                                                                                                                                                                                                                                                                                                                  | covalent chromatin modification [GO:0016569]; regulation of transcription, DNA-templated [GO:0006355]; transcription, DNA-templated [GO:0006351]                                                                                                                                                                                                                                                                                                                                                                                                                                                                                                                                                                                                                                                                                                   |
| 62 | P29375 | KDM5A_HUMAN | KDM5A JARID1A RBBP2 RBP2           | Lysine-specific demethylase 5A (EC 1.14.11.-) (Histone demethylase JARID1A) (Jumonji/ARID domain-containing protein 1A) (Retinoblastoma-binding protein 2) (RBBP-2)                                                      | H483-E485-H571    | 1 Fe cation | Catalytic | 1.14.11.- | Mitochondrion, Nucleus | No |                                                                                                                                                                                                                                                                                                                                                                                                                                                                                                                                                                                                                                                                                                                                                  | circadian regulation of gene expression [GO:0032922]; histone H3-K4 demethylation [GO:0034720]; male gonad development [GO:0008584]; negative regulation of histone deacetylase activity [GO:1901726]; negative regulation of transcription from RNA polymerase II promoter [GO:0000122]; positive regulation of transcription, DNA-templated [GO:0045893]; regulation of sequence-specific DNA binding transcription factor activity [GO:0051090]; spermatogenesis [GO:0007283]; transcription from RNA polymerase II promoter [GO:0006366]                                                                                                                                                                                                                                                                                                       |
| 63 | Q9UGL1 | KDM5B_HUMAN | KDM5B JARID1B PLU1 RBBP2H1         | Lysine-specific demethylase 5B (EC 1.14.11.-) (Cancer/testis antigen 31) (CT31) (Histone demethylase JARID1B) (Jumonji/ARID domain-containing protein 1B) (PLU-1) (Retinoblastoma-binding protein 2 homolog 1) (RBP2-H1) | H499-E501-H587    | 1 Fe cation | Catalytic | 1.14.11.- | Nucleus                | No |                                                                                                                                                                                                                                                                                                                                                                                                                                                                                                                                                                                                                                                                                                                                                  | branching involved in mammary gland duct morphogenesis [GO:0060444]; cellular response to fibroblast growth factor stimulus [GO:0044344]; histone H3-K4 demethylation [GO:0034720]; lens fiber cell differentiation [GO:0070306]; mammary duct terminal end bud growth [GO:0060763]; negative regulation of transcription, DNA-templated [GO:0045892]; positive regulation of gene expression [GO:0010628]; positive regulation of mammary gland epithelial cell proliferation [GO:0033601]; post-embryonic development [GO:0009791]; regulation of estradiol secretion [GO:2000864]; regulation of transcription from RNA polymerase II promoter [GO:0006357]; response to fungicide [GO:0060992]; rhythmic process [GO:0048511]; single fertilization [GO:0007338]; transcription, DNA-templated [GO:0006351]; uterus morphogenesis [GO:0061038] |
| 64 | P41229 | KDM5C_HUMAN | KDM5C DXS1272E JARID1C SMCX XE169  | Lysine-specific demethylase 5C (EC 1.14.11.-) (Histone demethylase JARID1C) (Jumonji/ARID domain-containing protein 1C) (Protein SmcX) (Protein Xe169)                                                                   | H514-E516-H602    | 1 Fe cation | Catalytic | 1.14.11.- | Nucleus                | No | DISEASE: Mental retardation, X-linked, syndromic, Claes-Jensen type (MRXSC) [MIM:300534]: A disorder characterized by significantly below average general intellectual functioning associated with impairments in adaptive behavior and manifested during the developmental period. MRXSC patients manifest mental retardation associated with variable features such as slowly progressive spastic paraplegia, seizures, facial dysmorphism. [ECO:0000269] PubMed:15586325, ECO:0000269 PubMed:16538222, ECO:0000269 PubMed:16541399, ECO:0000269 PubMed:17320160, ECO:0000269 PubMed:17468742, ECO:0000269 PubMed:23356856, ECO:0000269 PubMed:25666439. Note=The disease is caused by mutations affecting the gene represented in this entry. | histone H3-K4 demethylation [GO:0034720]; negative regulation of transcription, DNA-templated [GO:0045892]; response to toxic substance [GO:0009636]; rhythmic process [GO:0048511]; transcription, DNA-templated [GO:0006351]                                                                                                                                                                                                                                                                                                                                                                                                                                                                                                                                                                                                                     |
| 65 | Q9BY66 | KDM5D_HUMAN | KDM5D HY HYA JARID1D KIAA0234 SMCY | Lysine-specific demethylase 5D (EC 1.14.11.-) (Histocompatibility Y antigen) (H-Y) (Histone demethylase JARID1D) (Jumonji/ARID domain-containing protein 1D) (Protein SmcY)                                              | H504-E506-H592    | 1 Fe cation | Catalytic | 1.14.11.- | Nucleus                | No |                                                                                                                                                                                                                                                                                                                                                                                                                                                                                                                                                                                                                                                                                                                                                  | histone H3-K4 demethylation [GO:0034720]; regulation of androgen receptor signaling pathway [GO:0060765]; regulation of transcription, DNA-templated [GO:0006355]; T cell antigen processing and presentation [GO:0002457]; transcription, DNA-templated [GO:0006351]                                                                                                                                                                                                                                                                                                                                                                                                                                                                                                                                                                              |
| 66 | O15550 | KDM6A_HUMAN | KDM6A UTX                          | Lysine-specific demethylase 6A (EC 1.14.11.-) (Histone demethylase UTX) (Ubiquitously-transcribed TPR protein on the X chromosome) (Ubiquitously-transcribed X chromosome tetratricopeptide repeat protein)              | H1146-E1148-H1226 | 1 Fe cation | Catalytic | 1.14.11.- | Nucleus                | No | DISEASE: Kabuki syndrome 2 (KABUK2) [MIM:300867]: A congenital mental retardation syndrome with additional features, including postnatal dwarfism, a peculiar facies characterized by long palpebral fissures with eversion of the lateral third of the lower eyelids, a broad and depressed nasal tip, large prominent earlobes, a cleft or high-arched palate, scoliosis, short fifth finger, persistence of fingerpads, radiographic abnormalities of the vertebrae, hands, and hip joints, and recurrent otitis media in infancy. [ECO:0000269] PubMed:22197486. Note=The disease is caused by mutations affecting the gene represented in this entry.                                                                                       | canonical Wnt signaling pathway [GO:0060070]; cardiovascular system development [GO:0072358]; heart morphogenesis [GO:0003007]; histone H3-K4 methylation [GO:0051568]; in utero embryonic development [GO:0001701]; mesodermal cell differentiation [GO:0048333]; multicellular organism growth [GO:0035264]; neural tube closure [GO:0001843]; notochord morphogenesis [GO:0048570]; positive regulation of gene expression [GO:0010628]; respiratory system process [GO:0003016]; somite rostral/caudal axis specification [GO:0032525]                                                                                                                                                                                                                                                                                                         |

|    |        |             |                            |                                                                                                                                                                                                   |                     |             |           |                        |                          |     |                                                                                                                                                                                                                                                                                                                                                                                                                                                                                                                                                                                                                                                                                                                                                                                                                                                                                                                                                                                                                                                                                                                                                                                                                                                                                                                                       |                                                                                                                                                                                                                                                                                                                                                                                                                                                                                                                                                                                                                                                                                                                                                                                                                                                                                                                                                                                                                                                                                                                                                                                                                                                                                                                                                                                                                                                                                                                                                                                                                                                                          |
|----|--------|-------------|----------------------------|---------------------------------------------------------------------------------------------------------------------------------------------------------------------------------------------------|---------------------|-------------|-----------|------------------------|--------------------------|-----|---------------------------------------------------------------------------------------------------------------------------------------------------------------------------------------------------------------------------------------------------------------------------------------------------------------------------------------------------------------------------------------------------------------------------------------------------------------------------------------------------------------------------------------------------------------------------------------------------------------------------------------------------------------------------------------------------------------------------------------------------------------------------------------------------------------------------------------------------------------------------------------------------------------------------------------------------------------------------------------------------------------------------------------------------------------------------------------------------------------------------------------------------------------------------------------------------------------------------------------------------------------------------------------------------------------------------------------|--------------------------------------------------------------------------------------------------------------------------------------------------------------------------------------------------------------------------------------------------------------------------------------------------------------------------------------------------------------------------------------------------------------------------------------------------------------------------------------------------------------------------------------------------------------------------------------------------------------------------------------------------------------------------------------------------------------------------------------------------------------------------------------------------------------------------------------------------------------------------------------------------------------------------------------------------------------------------------------------------------------------------------------------------------------------------------------------------------------------------------------------------------------------------------------------------------------------------------------------------------------------------------------------------------------------------------------------------------------------------------------------------------------------------------------------------------------------------------------------------------------------------------------------------------------------------------------------------------------------------------------------------------------------------|
| 67 | O15054 | KDM6B_HUMAN | KDM6B JMJD3 KIAA0346       | Lysine-specific demethylase 6B (EC 1.14.11.-) (JmjC domain-containing protein 3) (Jumonji domain-containing protein 3) (Lysine demethylase 6B)                                                    | H1390-E1392-H1470   | 1 Fe cation | Catalytic | 1.14.11.-              | Nucleus                  | No  |                                                                                                                                                                                                                                                                                                                                                                                                                                                                                                                                                                                                                                                                                                                                                                                                                                                                                                                                                                                                                                                                                                                                                                                                                                                                                                                                       | cardiac muscle cell differentiation [GO:0055007]; cell fate commitment [GO:0045165]; cellular response to hydrogen peroxide [GO:0070301]; endothelial cell differentiation [GO:0045446]; hippocampus development [GO:0021766]; inflammatory response to antigenic stimulus [GO:0002437]; mesodermal cell differentiation [GO:0048333]; positive regulation of transcription from RNA polymerase II promoter [GO:0045944]; response to activity [GO:0014823]; response to fungicide [GO:0060992]                                                                                                                                                                                                                                                                                                                                                                                                                                                                                                                                                                                                                                                                                                                                                                                                                                                                                                                                                                                                                                                                                                                                                                          |
| 68 | Q6ZMT4 | KDM7A_HUMAN | KDM7A JHDM1D KDM7 KIAA1718 | Lysine-specific demethylase 7A (EC 1.14.11.-) (JmjC domain-containing histone demethylation protein 1D) (Lysine-specific demethylase 7)                                                           | H282-D284-Y292-H354 | 1 Fe cation | Catalytic | 1.14.11.-              | Nucleus                  | No  |                                                                                                                                                                                                                                                                                                                                                                                                                                                                                                                                                                                                                                                                                                                                                                                                                                                                                                                                                                                                                                                                                                                                                                                                                                                                                                                                       | histone H3-K27 demethylation [GO:0071557]; histone H3-K36 demethylation [GO:0070544]; histone H3-K9 demethylation [GO:0033169]; histone H4-K20 demethylation [GO:0035574]; midbrain development [GO:0030901]; positive regulation of transcription, DNA-templated [GO:0045893]; transcription, DNA-templated [GO:0006351]                                                                                                                                                                                                                                                                                                                                                                                                                                                                                                                                                                                                                                                                                                                                                                                                                                                                                                                                                                                                                                                                                                                                                                                                                                                                                                                                                |
| 69 | Q8N371 | KDM8_HUMAN  | KDM8 JMJD5                 | Lysine-specific demethylase 8 (EC 1.14.11.27) (JmjC domain-containing protein 5) (Jumonji domain-containing protein 5)                                                                            | H321-D323-H400      | 1 Fe cation | Catalytic | 1.14.11.27             | Nucleus                  | No  |                                                                                                                                                                                                                                                                                                                                                                                                                                                                                                                                                                                                                                                                                                                                                                                                                                                                                                                                                                                                                                                                                                                                                                                                                                                                                                                                       | G2/M transition of mitotic cell cycle [GO:0000086]; histone H3-K36 demethylation [GO:0070544]; positive regulation of transcription, DNA-templated [GO:0045893]; transcription, DNA-templated [GO:0006351]                                                                                                                                                                                                                                                                                                                                                                                                                                                                                                                                                                                                                                                                                                                                                                                                                                                                                                                                                                                                                                                                                                                                                                                                                                                                                                                                                                                                                                                               |
| 70 | P18054 | LOX12_HUMAN | ALOX12 12LO LOG12          | Arachidonate 12-lipoxygenase, 12S-type (12S-LOX) (12S-lipoxygenase) (EC 1.13.11.31) (Lipoxygenase 12-LO) (EC 3.3.2.-) (Platelet-type lipoxygenase 12)                                             | H360-H365-H540      | 1 Fe cation | Catalytic | 1.13.11.31; 3.3.2.-    | Cytoplasm                | Yes | DISEASE: Esophageal cancer (ESCR) [MIM:133239]: A malignancy of the esophagus. The most common types are esophageal squamous cell carcinoma and adenocarcinoma. Cancer of the esophagus remains a devastating disease because it is usually not detected until it has progressed to an advanced incurable stage. {ECO:0000269} PubMed:17460548). Note=Disease susceptibility may be associated with variations affecting the gene represented in this entry. Gln at position 261 may confer interindividual susceptibility to esophageal cancer (PubMed:17460548). {ECO:0000269} PubMed:17460548).; DISEASE: Colorectal cancer (CRC) [MIM:114500]: A complex disease characterized by malignant lesions arising from the inner wall of the large intestine (the colon) and the rectum. Genetic alterations are often associated with progression from premalignant lesion (adenoma) to invasive adenocarcinoma. Risk factors for cancer of the colon and rectum include colon polyps, long-standing ulcerative colitis, and genetic family history. {ECO:0000269} PubMed:17151091). Note=Disease susceptibility may be associated with variations affecting the gene represented in this entry. Gln at position 261 may confer interindividual susceptibility to colorectal cancer (PubMed:17460548). {ECO:0000269} PubMed:17460548). | aging [GO:0007568]; arachidonic acid metabolic process [GO:0019369]; cellular response to lipid [GO:0071396]; establishment of skin barrier [GO:0061436]; fatty acid oxidation [GO:0019395]; heparin biosynthetic process [GO:0051122]; heparin metabolic process [GO:0051121]; leukotriene A4 metabolic process [GO:1901751]; linoleic acid metabolic process [GO:0043651]; lipoxin A4 biosynthetic process [GO:2001303]; lipoxin B4 biosynthetic process [GO:2001306]; lipoxin metabolic process [GO:2001300]; lipoxygenase pathway [GO:0019372]; movement of cell or subcellular component [GO:0006928]; negative regulation of apoptotic process [GO:0043066]; negative regulation of muscle cell apoptotic process [GO:0010656]; negative regulation of platelet aggregation [GO:0090331]; positive regulation of angiogenesis [GO:0045766]; positive regulation of blood vessel diameter [GO:0097755]; positive regulation of cell adhesion [GO:0045785]; positive regulation of cell growth [GO:0030307]; positive regulation of cell migration [GO:0030335]; positive regulation of cell proliferation [GO:0008284]; positive regulation of cysteine-type endopeptidase activity involved in apoptotic process [GO:0043280]; positive regulation of endothelial cell differentiation [GO:0045603]; positive regulation of endothelial cell migration [GO:0010595]; positive regulation of gene expression [GO:0010628]; positive regulation of mitochondrial depolarization [GO:0051901]; positive regulation of smooth muscle cell proliferation [GO:0048661]; reactive oxygen species metabolic process [GO:0072593]; superoxide anion generation [GO:0042554] |
| 71 | P16050 | LOX15_HUMAN | ALOX15 LOG15               | Arachidonate 15-lipoxygenase (15-LOX) (15-LOX-1) (EC 1.13.11.33) (12/15-lipoxygenase) (Arachidonate 12-lipoxygenase, leukocyte-type) (12-LOX) (EC 1.13.11.31) (Arachidonate omega-6 lipoxygenase) | H360-H365-H540      | 1 Fe cation | Catalytic | 1.13.11.33; 1.13.11.31 | Cytoplasm, Cell membrane | Yes | DISEASE: Note=Disease susceptibility may be associated with variations affecting the gene represented in this entry. Met at position 560 may confer interindividual susceptibility to coronary artery disease (CAD) (PubMed:17959182). {ECO:0000269} PubMed:17959182).                                                                                                                                                                                                                                                                                                                                                                                                                                                                                                                                                                                                                                                                                                                                                                                                                                                                                                                                                                                                                                                                | apoptotic cell clearance [GO:0043277]; arachidonic acid metabolic process [GO:0019369]; bone mineralization [GO:0030282]; cellular response to calcium ion [GO:0071277]; cellular response to interleukin-13 [GO:0035963]; heparin biosynthetic process [GO:0051122]; inflammatory response [GO:0006954]; leukotriene metabolic process [GO:0006691]; lipoxin A4 biosynthetic process [GO:2001303]; lipoxygenase pathway [GO:0019372]; negative regulation of adaptive immune response [GO:0002820]; ossification [GO:0001503]; phosphatidylethanolamine biosynthetic process [GO:0006646]; positive regulation of actin filament polymerization [GO:0030838]; positive regulation of cell-substrate adhesion [GO:0010811]; positive regulation of ERK1 and ERK2 cascade [GO:0070374]; positive regulation of heterotypic cell-cell adhesion [GO:0034116]; regulation of engulfment of apoptotic cell [GO:1901074]; regulation of peroxisome proliferator activated receptor signaling pathway [GO:0035358]; response to endoplasmic reticulum stress [GO:0034976]; wound healing [GO:0042060]                                                                                                                                                                                                                                                                                                                                                                                                                                                                                                                                                                           |
| 72 | P09917 | LOX5_HUMAN  | ALOX5 LOG5                 | Arachidonate 5-lipoxygenase (5-LO) (5-lipoxygenase) (EC 1.13.11.34)                                                                                                                               | H368-H373-H551      | 1 Fe cation | Catalytic | 1.13.11.34             | Cytoplasm, Nucleus       | Yes |                                                                                                                                                                                                                                                                                                                                                                                                                                                                                                                                                                                                                                                                                                                                                                                                                                                                                                                                                                                                                                                                                                                                                                                                                                                                                                                                       | leukotriene biosynthetic process [GO:0019370]; leukotriene metabolic process [GO:0006691]; leukotriene production involved in inflammatory response [GO:0002540]; lipoxin metabolic process [GO:2001300]; lipoxygenase pathway [GO:0019372]; neutrophil degranulation [GO:0043312]                                                                                                                                                                                                                                                                                                                                                                                                                                                                                                                                                                                                                                                                                                                                                                                                                                                                                                                                                                                                                                                                                                                                                                                                                                                                                                                                                                                       |

|    |        |             |                 |                                                                                                                                                                                   |                          |                   |           |                          |           |    |                                                                                                                                                                                                                                                                                                                                                                                                                                                                                                                                                                                                                                                                                                                                                                                                                                                                                                                                                                                                                                                                                                                                 |                                                                                                                                                                                                                                                                                                                                                                                                                                                                                                                                                                                                                                                                                                                                                                                                                                                                              |
|----|--------|-------------|-----------------|-----------------------------------------------------------------------------------------------------------------------------------------------------------------------------------|--------------------------|-------------------|-----------|--------------------------|-----------|----|---------------------------------------------------------------------------------------------------------------------------------------------------------------------------------------------------------------------------------------------------------------------------------------------------------------------------------------------------------------------------------------------------------------------------------------------------------------------------------------------------------------------------------------------------------------------------------------------------------------------------------------------------------------------------------------------------------------------------------------------------------------------------------------------------------------------------------------------------------------------------------------------------------------------------------------------------------------------------------------------------------------------------------------------------------------------------------------------------------------------------------|------------------------------------------------------------------------------------------------------------------------------------------------------------------------------------------------------------------------------------------------------------------------------------------------------------------------------------------------------------------------------------------------------------------------------------------------------------------------------------------------------------------------------------------------------------------------------------------------------------------------------------------------------------------------------------------------------------------------------------------------------------------------------------------------------------------------------------------------------------------------------|
| 73 | Q98Y11 | LOXE3_HUMAN | ALOXE3          | Hydroperoxide isomerase ALOXE3 (EC 5.4.4.7) (Epidermis-type lipoygenase 3) (Epidermal LOX-3) (e-LOX-3) (eLOX-3) (Hydroperoxy icosatetraenoate dehydratase) (EC 4.2.1.152)         | H408-H413-H588           | 1 Fe cation       | Catalytic | 5.4.4.7;<br>4.2.1.152    | Cytoplasm | No | DISEASE: Ichthyosis, congenital, autosomal recessive 3 (ARCI3) [MIM:606545]: A form of autosomal recessive congenital ichthyosis, a disorder of keratinization with abnormal differentiation and desquamation of the epidermis, resulting in abnormal skin scaling over the whole body. The main skin phenotypes are lamellar ichthyosis (LI) and non-bullous congenital ichthyosiform erythroderma (NCIE), although phenotypic overlap within the same patient or among patients from the same family can occur. Lamellar ichthyosis is a condition often associated with an embedment in a collodion-like membrane at birth; skin scales later develop, covering the entire body surface. Non-bullous congenital ichthyosiform erythroderma characterized by fine whitish scaling on an erythrodermal background; larger brownish scales are present on the buttocks, neck and legs. {ECO:0000269 PubMed:11773004, ECO:0000269 PubMed:15629692, ECO:0000269 PubMed:16116617, ECO:0000269 PubMed:19131948, ECO:0000269 PubMed:19890349}. Note=The disease is caused by mutations affecting the gene represented in this entry. | arachidonic acid metabolic process [GO:0019369]; ceramide biosynthetic process [GO:0046513]; establishment of skin barrier [GO:0061436]; fat cell differentiation [GO:0045444]; heparin biosynthetic process [GO:0051122]; linoleic acid metabolic process [GO:0043651]; lipoygenase pathway [GO:0019372]; peroxisome proliferator activated receptor signaling pathway [GO:0035357]; sensory perception of pain [GO:0019233]; sphingolipid metabolic process [GO:0006665]                                                                                                                                                                                                                                                                                                                                                                                                   |
| 74 | O75342 | LX12B_HUMAN | ALOX12B         | Arachidonate 12-lipoxygenase, 12R-type (12R-LOX) (12R-lipoxygenase) (EC 1.13.11.-) (Epidermis-type lipoxygenase 12)                                                               | H398-H403-H578           | 1 Fe cation       | Catalytic | 1.13.11.-                | Cytoplasm | No | DISEASE: Ichthyosis, congenital, autosomal recessive 2 (ARCI2) [MIM:242100]: A form of autosomal recessive congenital ichthyosis, a disorder of keratinization with abnormal differentiation and desquamation of the epidermis, resulting in abnormal skin scaling over the whole body. The main skin phenotypes are lamellar ichthyosis (LI) and non-bullous congenital ichthyosiform erythroderma (NCIE), although phenotypic overlap within the same patient or among patients from the same family can occur. Lamellar ichthyosis is a condition often associated with an embedment in a collodion-like membrane at birth; skin scales later develop, covering the entire body surface. Non-bullous congenital ichthyosiform erythroderma characterized by fine whitish scaling on an erythrodermal background; larger brownish scales are present on the buttocks, neck and legs. {ECO:0000269 PubMed:11773004, ECO:0000269 PubMed:15629692, ECO:0000269 PubMed:16116617, ECO:0000269 PubMed:19131948, ECO:0000269 PubMed:19890349}. Note=The disease is caused by mutations affecting the gene represented in this entry. | arachidonic acid metabolic process [GO:0019369]; ceramide biosynthetic process [GO:0046513]; establishment of skin barrier [GO:0061436]; heparin biosynthetic process [GO:0051122]; linoleic acid metabolic process [GO:0043651]; lipoygenase pathway [GO:0019372]; oxidation-reduction process [GO:0055114]; positive regulation of gene expression [GO:0010628]; positive regulation of MAPK cascade [GO:0043410]; positive regulation of mucus secretion [GO:0070257]; protein lipidation [GO:0006497]; sphingolipid metabolic process [GO:0006665]                                                                                                                                                                                                                                                                                                                       |
| 75 | O15296 | LX15B_HUMAN | ALOX15B         | Arachidonate 15-lipoxygenase B (15-LOX-B) (EC 1.13.11.33) (15-lipoxygenase 2) (15-LOX-2) (Arachidonate 15-lipoxygenase type II) (Linoleate 13-lipoxygenase 15-LoB) (EC 1.13.11.-) | H373-H378-H553           | 1 Fe cation       | Catalytic | 1.13.11.33;<br>1.13.11.- | Nucleus   | No |                                                                                                                                                                                                                                                                                                                                                                                                                                                                                                                                                                                                                                                                                                                                                                                                                                                                                                                                                                                                                                                                                                                                 | apoptotic process [GO:0006915]; arachidonic acid metabolic process [GO:0019369]; heparin biosynthetic process [GO:0051122]; linoleic acid metabolic process [GO:0043651]; lipid metabolic process [GO:0006629]; lipoygenase pathway [GO:0019372]; negative regulation of cell cycle [GO:0045786]; negative regulation of cell migration [GO:0030336]; negative regulation of cell proliferation [GO:0008285]; negative regulation of growth [GO:0045926]; positive regulation of chemokine secretion [GO:0090197]; positive regulation of keratinocyte differentiation [GO:0045618]; positive regulation of macrophage derived foam cell differentiation [GO:0010744]; positive regulation of peroxisome proliferator activated receptor signaling pathway [GO:0035360]; prostate gland development [GO:0030850]; regulation of epithelial cell differentiation [GO:0030856] |
| 76 | P53582 | MAP11_HUMAN | METAP1 KIAA0094 | Methionine aminopeptidase 1 (MAP 1) (MetAP 1) (EC 3.4.11.18) (Peptidase M 1)                                                                                                      | D220-D231-H294-E327-E358 | 1 Divalent cation | Catalytic | 3.4.11.18                | Cytoplasm | No |                                                                                                                                                                                                                                                                                                                                                                                                                                                                                                                                                                                                                                                                                                                                                                                                                                                                                                                                                                                                                                                                                                                                 | N-terminal protein amino acid modification [GO:0031365]; peptidyl-methionine modification [GO:0018206]; platelet aggregation [GO:0070527]; regulation of rhodopsin mediated signaling pathway [GO:0022400]; regulation of translation [GO:0006417]                                                                                                                                                                                                                                                                                                                                                                                                                                                                                                                                                                                                                           |

|    |        |             |                          |                                                                                                                                                                                                    |                                    |                    |                       |            |                       |     |                                                                                                                                                                                                                                                                                                                                                                                                                                                                                                                                                                                                                                                                                                                                                                                                                                                                                                                  |                                                                                                                                                                                                                                                                                                                                                                                                                                                                                                                                                                                                                                                                                                                                                                                                                                                                                                                                                                                                                                                                                                                                                                                                                                                                                                                                                                               |
|----|--------|-------------|--------------------------|----------------------------------------------------------------------------------------------------------------------------------------------------------------------------------------------------|------------------------------------|--------------------|-----------------------|------------|-----------------------|-----|------------------------------------------------------------------------------------------------------------------------------------------------------------------------------------------------------------------------------------------------------------------------------------------------------------------------------------------------------------------------------------------------------------------------------------------------------------------------------------------------------------------------------------------------------------------------------------------------------------------------------------------------------------------------------------------------------------------------------------------------------------------------------------------------------------------------------------------------------------------------------------------------------------------|-------------------------------------------------------------------------------------------------------------------------------------------------------------------------------------------------------------------------------------------------------------------------------------------------------------------------------------------------------------------------------------------------------------------------------------------------------------------------------------------------------------------------------------------------------------------------------------------------------------------------------------------------------------------------------------------------------------------------------------------------------------------------------------------------------------------------------------------------------------------------------------------------------------------------------------------------------------------------------------------------------------------------------------------------------------------------------------------------------------------------------------------------------------------------------------------------------------------------------------------------------------------------------------------------------------------------------------------------------------------------------|
| 77 | Q6UB28 | MAP12_HUMAN | METAP1D MAP1D            | Methionine aminopeptidase 1D, mitochondrial (MAP 1D) (MetAP 1D) (EC 3.4.11.18) (Methionyl aminopeptidase type 1D, mitochondrial) (Peptidase M 1D)                                                  | D178-D189-H252-E284-E315           | 1 Divalent cation  | Catalytic             | 3.4.11.18  | Mitochondrion         | No  |                                                                                                                                                                                                                                                                                                                                                                                                                                                                                                                                                                                                                                                                                                                                                                                                                                                                                                                  | N-terminal protein amino acid modification [GO:0031365]; peptidyl-methionine modification [GO:0018206]                                                                                                                                                                                                                                                                                                                                                                                                                                                                                                                                                                                                                                                                                                                                                                                                                                                                                                                                                                                                                                                                                                                                                                                                                                                                        |
| 78 | P50579 | MAP2_HUMAN  | METAP2 MNPEP P67EIF2     | Methionine aminopeptidase 2 (MAP 2) (MetAP 2) (EC 3.4.11.18) (Initiation factor 2-associated 67 kDa glycoprotein) (p67) (p67eIF2) (Peptidase M)                                                    | D251-D262-H331-E364-E459           | 1 Divalent cation  | Catalytic             | 3.4.11.18  | Cytoplasm             | No  |                                                                                                                                                                                                                                                                                                                                                                                                                                                                                                                                                                                                                                                                                                                                                                                                                                                                                                                  | N-terminal protein amino acid modification [GO:0031365]; peptidyl-methionine modification [GO:0018206]; protein processing [GO:0016485]; regulation of rhodopsin mediated signaling pathway [GO:0022400]                                                                                                                                                                                                                                                                                                                                                                                                                                                                                                                                                                                                                                                                                                                                                                                                                                                                                                                                                                                                                                                                                                                                                                      |
| 79 | Q9NYZ2 | MFRN1_HUMAN | SLC25A37 MFRN MSCP HT015 | Mitoferrin-1 (Mitochondrial iron transporter 1) (Mitochondrial solute carrier protein) (Solute carrier family 25 member 37)                                                                        | Unknown                            | Unknown            | Substrate - transport |            | Mitochondrion         | Yes |                                                                                                                                                                                                                                                                                                                                                                                                                                                                                                                                                                                                                                                                                                                                                                                                                                                                                                                  | iron ion homeostasis [GO:0055072]; mitochondrial iron ion transport [GO:0048250]                                                                                                                                                                                                                                                                                                                                                                                                                                                                                                                                                                                                                                                                                                                                                                                                                                                                                                                                                                                                                                                                                                                                                                                                                                                                                              |
| 80 | Q96A46 | MFRN2_HUMAN | SLC25A28 MFRN2 NPDP016   | Mitoferrin-2 (Mitochondrial RNA-splicing protein 3/4 homolog) (MRS3/4) (hMRS3/4) (Mitochondrial iron transporter 2) (Solute carrier family 25 member 28)                                           | Unknown                            | Unknown            | Substrate - transport |            | Mitochondrion         | Yes |                                                                                                                                                                                                                                                                                                                                                                                                                                                                                                                                                                                                                                                                                                                                                                                                                                                                                                                  | iron ion homeostasis [GO:0055072]; mitochondrial iron ion transport [GO:0048250]                                                                                                                                                                                                                                                                                                                                                                                                                                                                                                                                                                                                                                                                                                                                                                                                                                                                                                                                                                                                                                                                                                                                                                                                                                                                                              |
| 81 | Q9UGB7 | MIOX_HUMAN  | MIOX ALDRL6 KSP32 RSOR   | Inositol oxygenase (EC 1.13.99.1) (Aldehyde reductase-like 6) (Kidney-specific protein 32) (Myo-inositol oxygenase) (MI oxygenase) (Renal-specific oxidoreductase)                                 | H98-H123-D124-D253; D124-H194-H220 | 2 Fe cations       | Catalytic             | 1.13.99.1  | Cytoplasm             | No  |                                                                                                                                                                                                                                                                                                                                                                                                                                                                                                                                                                                                                                                                                                                                                                                                                                                                                                                  | inositol catabolic process [GO:0019310]                                                                                                                                                                                                                                                                                                                                                                                                                                                                                                                                                                                                                                                                                                                                                                                                                                                                                                                                                                                                                                                                                                                                                                                                                                                                                                                                       |
| 82 | O15442 | MPPD1_HUMAN | MPPED1 C22orf1 FAM1A     | Metallophosphoesterase domain containing protein 1 (EC 3.1.-.-) (Adult brain protein 239) (Z39AB)                                                                                                  | D97-H99-D118-H286; H245-H284-N149  | 2 Divalent cations | Catalytic             | 3.1.-.-    | Unknown               | No  |                                                                                                                                                                                                                                                                                                                                                                                                                                                                                                                                                                                                                                                                                                                                                                                                                                                                                                                  |                                                                                                                                                                                                                                                                                                                                                                                                                                                                                                                                                                                                                                                                                                                                                                                                                                                                                                                                                                                                                                                                                                                                                                                                                                                                                                                                                                               |
| 83 | P49959 | MRE11_HUMAN | MRE11 HNGS1 MRE11A       | Double-strand break repair protein MRE11 (Double-strand break repair protein MRE11A) (Meiotic recombination 11 homolog 1) (MRE11 homolog 1) (Meiotic recombination 11 homolog A) (MRE11 homolog A) | D20-H22-D60                        | 1 Fe cation        | Catalytic             |            | Nucleus               | No  | DISEASE: Ataxia-telangiectasia-like disorder 1 (ATLD1) [MIM:604391]: A rare disorder characterized by progressive cerebellar ataxia, dysarthria, abnormal eye movements, and absence of telangiectasia. ATLD patients show normal levels of total IgG, IgA and IgM, although there may be reduced levels of specific functional antibodies. At the cellular level, ATLD exhibits hypersensitivity to ionizing radiation and radioresistant DNA synthesis. {ECO:0000269 PubMed:10612394}. Note=The disease is caused by mutations affecting the gene represented in this entry.; DISEASE: Note=Defects in MRE11 can be a cause of nephronophthisis-related ciliopathies (NPHP-RC), a group of recessive diseases that affect kidney, retina and brain. A homozygous truncating mutation MRE11 has been found in patients with cerebellar vermis hypoplasia, ataxia and dysarthria. {ECO:0000269 PubMed:22863007}. | cell proliferation [GO:0008283]; cellular response to DNA damage stimulus [GO:0006974]; DNA double-strand break processing [GO:0000729]; DNA duplex unwinding [GO:0032508]; DNA recombination [GO:0006310]; DNA repair [GO:0006281]; DNA replication [GO:0006260]; DNA synthesis involved in DNA repair [GO:0000731]; double-strand break repair [GO:0006302]; double-strand break repair via homologous recombination [GO:0000724]; double-strand break repair via nonhomologous end joining [GO:0006303]; intra-S DNA damage checkpoint [GO:0031573]; mitotic G2 DNA damage checkpoint [GO:0007095]; negative regulation of apoptotic process [GO:0043066]; negative regulation of DNA endoreduplication [GO:0032876]; positive regulation of kinase activity [GO:0033674]; positive regulation of protein autophosphorylation [GO:0031954]; positive regulation of telomere maintenance [GO:0032206]; positive regulation of type I interferon production [GO:0032481]; reciprocal meiotic recombination [GO:0007131]; regulation of mitotic recombination [GO:0000019]; regulation of signal transduction by p53 class mediator [GO:1901796]; sister chromatid cohesion [GO:0007062]; strand displacement [GO:0000732]; synapsis [GO:0007129]; telomere maintenance via telomerase [GO:0007004]; telomeric 3' overhang formation [GO:0031860]; viral process [GO:0016032] |
| 84 | Q15800 | MSMO1_HUMAN | MSMO1 DESP4 ERG25 SC4MOL | Methylsterol monoxygenase 1 (EC 1.14.13.72) (C-4 methylsterol oxidase)                                                                                                                             | Unknown                            | 1 Fe cation        | Catalytic             | 1.14.13.72 | Endoplasmic reticulum | Yes | DISEASE: Microcephaly, congenital cataract, and psoriasisform dermatitis (MCCPD) [MIM:616834]: An autosomal recessive inborn error of cholesterol metabolism characterized by accumulation of a large amount of methylsterols, particularly dimethylsterols, in affected individuals. Patients manifest psoriasisform dermatitis, arthralgias, congenital cataracts, microcephaly, and developmental delay. {ECO:0000269 PubMed:21285510, ECO:0000269 PubMed:24144731}. Note=The disease is caused by mutations affecting the gene represented in this entry.                                                                                                                                                                                                                                                                                                                                                    | cholesterol biosynthetic process [GO:0006695]; fatty acid metabolic process [GO:0006631]; steroid metabolic process [GO:0008202]; sterol biosynthetic process [GO:0016126]                                                                                                                                                                                                                                                                                                                                                                                                                                                                                                                                                                                                                                                                                                                                                                                                                                                                                                                                                                                                                                                                                                                                                                                                    |

|    |        |             |                             |                                                                                                                                                                                                                                                                             |                  |                          |                       |            |                                   |     |  |                                                                                                                                                                                                                                                                                                                                                                                                                                                                                                                                                                                                                                                                                                                                                                                                                                                                                                                                                                                                                                                                                                                                                                                                                                                                                                                                                                                                                                                                                                                                                                                                                                                                                                                                                                                                                                                                                                                                                                                |
|----|--------|-------------|-----------------------------|-----------------------------------------------------------------------------------------------------------------------------------------------------------------------------------------------------------------------------------------------------------------------------|------------------|--------------------------|-----------------------|------------|-----------------------------------|-----|--|--------------------------------------------------------------------------------------------------------------------------------------------------------------------------------------------------------------------------------------------------------------------------------------------------------------------------------------------------------------------------------------------------------------------------------------------------------------------------------------------------------------------------------------------------------------------------------------------------------------------------------------------------------------------------------------------------------------------------------------------------------------------------------------------------------------------------------------------------------------------------------------------------------------------------------------------------------------------------------------------------------------------------------------------------------------------------------------------------------------------------------------------------------------------------------------------------------------------------------------------------------------------------------------------------------------------------------------------------------------------------------------------------------------------------------------------------------------------------------------------------------------------------------------------------------------------------------------------------------------------------------------------------------------------------------------------------------------------------------------------------------------------------------------------------------------------------------------------------------------------------------------------------------------------------------------------------------------------------------|
| 85 | Q98V57 | MTND_HUMAN  | ADI1 MTCBP1 HMFT1638        | 1,2-dihydroxy-3-keto-5-methylthiopentene dioxygenase (EC 1.13.11.54) (Acireductone dioxygenase [Fe(2+)-requiring]) (ARD) (Fe-ARD) (Membrane-type 1 matrix metalloproteinase cytoplasmic tail-binding protein 1) (MTCBP-1) (Submergence-induced protein-like factor) (Sip-L) | H88-H90-E94-H133 | 1 Fe cation              | Catalytic             | 1.13.11.54 | Cytoplasm, Cell membrane, Nucleus | Yes |  | L-methionine salvage from methylthioadenosine [GO:0019509]                                                                                                                                                                                                                                                                                                                                                                                                                                                                                                                                                                                                                                                                                                                                                                                                                                                                                                                                                                                                                                                                                                                                                                                                                                                                                                                                                                                                                                                                                                                                                                                                                                                                                                                                                                                                                                                                                                                     |
| 86 | P80188 | NGAL_HUMAN  | LCN2 HNL NGAL               | Neutrophil gelatinase-associated lipocalin (NGAL) (25 kDa alpha-2-microglobulin-related subunit of MMP-9) (Lipocalin-2) (Oncogene 24p3) (Siderocalin LCN2) (p25)                                                                                                            | Y126-K145-K154   | Binds ferric siderophore | Substrate - transport |            | Extracellular space               | No  |  | antimicrobial humoral response [GO:0019730]; cellular iron ion homeostasis [GO:0006879]; cellular response to hydrogen peroxide [GO:0070301]; cellular response to interleukin-1 [GO:0071347]; cellular response to lipopolysaccharide [GO:0071222]; cellular response to nutrient levels [GO:0031669]; cellular response to tumor necrosis factor [GO:0071356]; extrinsic apoptotic signaling pathway in absence of ligand [GO:0097192]; innate immune response [GO:0045087]; ion transport [GO:0006811]; neutrophil degranulation [GO:0043312]; positive regulation of cell projection organization [GO:0031346]; positive regulation of gene expression [GO:0010628]; protein homotrimerization [GO:0070207]; response to drug [GO:0042493]; response to herbicide [GO:0009635]; response to mycotoxin [GO:0010046]; response to virus [GO:0009615]; siderophore transport [GO:0015891]                                                                                                                                                                                                                                                                                                                                                                                                                                                                                                                                                                                                                                                                                                                                                                                                                                                                                                                                                                                                                                                                                     |
| 87 | Q9GZT8 | NIF3L_HUMAN | NIF3L1 ALS2CR1 MDS015 My018 | NIF3-like protein 1 (Amyotrophic lateral sclerosis 2 chromosomal region candidate gene 1 protein)                                                                                                                                                                           | H93-H339-E343    | 1 Fe cation              | Catalytic             |            | Cytoplasm, Nucleus                | No  |  | negative regulation of nucleic acid-templated transcription [GO:1903507]; neuron differentiation [GO:0030182]; positive regulation of transcription, DNA-templated [GO:0045893]                                                                                                                                                                                                                                                                                                                                                                                                                                                                                                                                                                                                                                                                                                                                                                                                                                                                                                                                                                                                                                                                                                                                                                                                                                                                                                                                                                                                                                                                                                                                                                                                                                                                                                                                                                                                |
| 88 | P49279 | NRAM1_HUMAN | SLC11A1 LSH NRAMP NRAMP1    | Natural resistance-associated macrophage protein 1 (NRAMP 1) (Solute carrier family 11 member 1)                                                                                                                                                                            | Unknown          | Unknown                  | Substrate - transport |            | Unknown                           | Yes |  | activation of protein kinase activity [GO:0032147]; antigen processing and presentation of peptide antigen [GO:0048002]; antimicrobial humoral response [GO:0019730]; cadmium ion transmembrane transport [GO:0070574]; cell redox homeostasis [GO:0045454]; cellular cadmium ion homeostasis [GO:0006876]; cellular iron ion homeostasis [GO:0006879]; defense response to bacterium [GO:0042742]; defense response to Gram-negative bacterium [GO:0050829]; defense response to protozoan [GO:0042832]; divalent metal ion export [GO:0070839]; inflammatory response [GO:0006954]; interleukin-2 production [GO:0032623]; interleukin-3 production [GO:0032632]; iron ion homeostasis [GO:0055072]; iron ion transport [GO:0006826]; L-arginine import [GO:0043091]; macrophage activation [GO:0042116]; manganese ion transport [GO:0006828]; MHC class II biosynthetic process [GO:0045342]; mRNA stabilization [GO:0048255]; multicellular organismal iron ion homeostasis [GO:0060586]; negative regulation of cytokine production [GO:0001818]; neutrophil degranulation [GO:0043312]; nitrite transport [GO:0015707]; phagocytosis [GO:0006909]; positive regulation of cytokine production [GO:0001819]; positive regulation of dendritic cell antigen processing and presentation [GO:0002606]; positive regulation of gene expression [GO:0010628]; positive regulation of interferon-gamma production [GO:0032729]; positive regulation of phagocytosis [GO:0050766]; positive regulation of T-helper 1 type immune response [GO:0002827]; positive regulation of transcription from RNA polymerase II promoter [GO:0045944]; respiratory burst [GO:0045730]; response to bacterium [GO:0009617]; response to interferon-gamma [GO:0034341]; response to lipopolysaccharide [GO:0032496]; T cell cytokine production [GO:0002369]; T cell proliferation involved in immune response [GO:0002309]; vacuolar acidification [GO:0007035]; wound healing [GO:0042060] |

|    |        |             |                                         |                                                                                                                                                                                                                                                                                                        |                     |                   |                       |           |                         |     |                                                                                                                                                                                                                                                                                                                                                                                                                                                                                                                                                                                                                                                                                                                                                                                                                                                                                                                                                                                                                                                                                                                                                                                                       |                                                                                                                                                                                                                                                                                                                                                                                                                                                                                                                                                                                                                                                                                                                                                                                                                                                                       |
|----|--------|-------------|-----------------------------------------|--------------------------------------------------------------------------------------------------------------------------------------------------------------------------------------------------------------------------------------------------------------------------------------------------------|---------------------|-------------------|-----------------------|-----------|-------------------------|-----|-------------------------------------------------------------------------------------------------------------------------------------------------------------------------------------------------------------------------------------------------------------------------------------------------------------------------------------------------------------------------------------------------------------------------------------------------------------------------------------------------------------------------------------------------------------------------------------------------------------------------------------------------------------------------------------------------------------------------------------------------------------------------------------------------------------------------------------------------------------------------------------------------------------------------------------------------------------------------------------------------------------------------------------------------------------------------------------------------------------------------------------------------------------------------------------------------------|-----------------------------------------------------------------------------------------------------------------------------------------------------------------------------------------------------------------------------------------------------------------------------------------------------------------------------------------------------------------------------------------------------------------------------------------------------------------------------------------------------------------------------------------------------------------------------------------------------------------------------------------------------------------------------------------------------------------------------------------------------------------------------------------------------------------------------------------------------------------------|
| 89 | P49281 | NRAM2_HUMAN | SLC11A2 DCT1 DMT1<br>NRAMP2 OK/SW-cl.20 | Natural resistance-associated macrophage protein 2 (NRAMP 2) (Divalent cation transporter 1) (Divalent metal transporter 1) (DMT-1) (Solute carrier family 11 member 2)                                                                                                                                | Unknown             | Unknown           | Substrate - transport |           | Cell membrane, Endosome | Yes | DISEASE: Anemia, hypochromic microcytic, with iron overload 1 (AHMIO1) [MIM:206100]: A hematologic disease characterized by abnormal hemoglobin content in the erythrocytes which are reduced in size. The disorder is due to an error of iron metabolism that results in high serum iron, massive hepatic iron deposition, and absence of sideroblasts and stainable bone marrow iron store. Despite adequate transferrin-iron complex, delivery of iron to the erythroid bone marrow is apparently insufficient for the demands of hemoglobin synthesis. (ECO:0000269   PubMed:15459009, ECO:0000269   PubMed:16160008, ECO:0000269   PubMed:16439678). Note=The disease is caused by mutations affecting the gene represented in this entry.                                                                                                                                                                                                                                                                                                                                                                                                                                                       | activation of cysteine-type endopeptidase activity involved in apoptotic process [GO:0006919]; cadmium ion transmembrane transport [GO:0070574]; cellular iron ion homeostasis [GO:0006879]; cellular response to oxidative stress [GO:0034599]; cobalt ion transport [GO:0006824]; copper ion transport [GO:0006825]; dendrite morphogenesis [GO:0048813]; detection of oxygen [GO:0003032]; erythrocyte development [GO:0048821]; ferrous iron import [GO:0070627]; ferrous iron transport [GO:0015684]; heme biosynthetic process [GO:0006783]; lead ion transport [GO:0015692]; learning or memory [GO:0007611]; manganese ion transport [GO:0006828]; multicellular organismal iron ion homeostasis [GO:0060586]; nickel cation transport [GO:0015675]; response to hypoxia [GO:0001666]; response to iron ion [GO:0010039]; vanadium ion transport [GO:0015676] |
| 90 | Q8N543 | OGFD1_HUMAN | OGFOD1 KIAA1612 TPA1                    | Prolyl 3-hydroxylase OGFOD1 (EC 1.14.11.-) (2-oxoglutarate and iron-dependent oxygenase domain-containing protein 1) (Termination and polyadenylation 1 homolog)                                                                                                                                       | H155-D157-H218      | 1 Fe cation       | Catalytic             | 1.14.11.- | Cytoplasm, Nucleus      | No  |                                                                                                                                                                                                                                                                                                                                                                                                                                                                                                                                                                                                                                                                                                                                                                                                                                                                                                                                                                                                                                                                                                                                                                                                       | cell proliferation [GO:0008283]; peptidyl-proline hydroxylation [GO:0019511]; protein hydroxylation [GO:0018126]; regulation of translational termination [GO:0006449]; stress granule assembly [GO:0034063]                                                                                                                                                                                                                                                                                                                                                                                                                                                                                                                                                                                                                                                          |
| 91 | Q6N063 | OGFD2_HUMAN | OGFOD2                                  | 2-oxoglutarate and iron-dependent oxygenase domain-containing protein 2 (EC 1.14.11.-)                                                                                                                                                                                                                 | H235-D237-H290      | 1 Fe cation       | Catalytic             | 1.14.11.- | Unknown                 | No  |                                                                                                                                                                                                                                                                                                                                                                                                                                                                                                                                                                                                                                                                                                                                                                                                                                                                                                                                                                                                                                                                                                                                                                                                       |                                                                                                                                                                                                                                                                                                                                                                                                                                                                                                                                                                                                                                                                                                                                                                                                                                                                       |
| 92 | Q6PK18 | OGFD3_HUMAN | OGFOD3 C17orf101                        | 2-oxoglutarate and iron-dependent oxygenase domain-containing protein 3 (EC 1.14.11.-)                                                                                                                                                                                                                 | H230-D232-H288      | 1 Fe cation       | Catalytic             | 1.14.11.- | Unknown                 | Yes |                                                                                                                                                                                                                                                                                                                                                                                                                                                                                                                                                                                                                                                                                                                                                                                                                                                                                                                                                                                                                                                                                                                                                                                                       |                                                                                                                                                                                                                                                                                                                                                                                                                                                                                                                                                                                                                                                                                                                                                                                                                                                                       |
| 93 | Q9NPF4 | OSGEP_HUMAN | OSGEP GCPL1                             | Probable tRNA N6-adenosine threonylcarbamoyltransferase (EC 2.3.1.234) (N6-L-threonylcarbamoyladenine synthase) (t(6)A synthase) (O-sialoglycoprotein endopeptidase) (hOSGEP) (t(6)A37 threonylcarbamoyladenine biosynthesis protein OSGEP) (tRNA threonylcarbamoyladenine biosynthesis protein OSGEP) | H109-H113-Y130-D294 | 1 Divalent cation | Catalytic             | 2.3.1.234 | Cytoplasm, Nucleus      | No  |                                                                                                                                                                                                                                                                                                                                                                                                                                                                                                                                                                                                                                                                                                                                                                                                                                                                                                                                                                                                                                                                                                                                                                                                       | tRNA threonylcarbamoyladenine modification [GO:0002949]                                                                                                                                                                                                                                                                                                                                                                                                                                                                                                                                                                                                                                                                                                                                                                                                               |
| 94 | Q32P28 | P3H1_HUMAN  | P3H1 GROS1 LEPRE1<br>PSEC0109           | Prolyl 3-hydroxylase 1 (EC 1.14.11.7) (Growth suppressor 1) (Leucine- and proline-enriched proteoglycan 1) (Leprecan-1)                                                                                                                                                                                | H587-D589-H659      | 1 Fe cation       | Catalytic             | 1.14.11.7 | Endoplasmic reticulum   | No  | DISEASE: Osteogenesis imperfecta 8 (OI8) [MIM:610915]: A form of osteogenesis imperfecta, a connective tissue disorder characterized by low bone mass, bone fragility and susceptibility to fractures after minimal trauma. Disease severity ranges from very mild forms without fractures to intrauterine fractures and perinatal lethality. Extraskeletal manifestations, which affect a variable number of patients, are dentinogenesis imperfecta, hearing loss, and blue sclerae. OI8 is characterized by disproportionate short stature, severe osteoporosis, shortening of the long bones, white sclerae, a round face and a short barrel-shaped chest. (ECO:0000269   PubMed:1727775, ECO:0000269   PubMed:19088120). Note=The disease is caused by mutations affecting the gene represented in this entry. A splice site mutation leading to the absence of isoform 1 has been reported in 2 OI8 patients. Isoform 1 is the only form predicted to be located in the endoplasmic reticulum, which the appropriate location for the catalysis of collagen hydroxylation. These patients show indeed severely reduced COL1A1 hydroxylation [PubMed:19088120]. (ECO:0000269   PubMed:19088120). | bone development [GO:0060348]; chaperone-mediated protein folding [GO:0061077]; collagen metabolic process [GO:0032963]; negative regulation of cell proliferation [GO:0008285]; negative regulation of post-translational protein modification [GO:1901874]; protein folding [GO:0006457]; protein hydroxylation [GO:0018126]; protein stabilization [GO:0050821]; regulation of protein secretion [GO:0050708]                                                                                                                                                                                                                                                                                                                                                                                                                                                      |



|     |        |             |                      |                                                                                                                                                         |                |             |           |            |                                        |     |                                                                                                                                                                                                                                                                                                                                                                                                                                                                                                                                                                                                                                                                                                                                                                                                                             |                                                                                                                                                                                              |
|-----|--------|-------------|----------------------|---------------------------------------------------------------------------------------------------------------------------------------------------------|----------------|-------------|-----------|------------|----------------------------------------|-----|-----------------------------------------------------------------------------------------------------------------------------------------------------------------------------------------------------------------------------------------------------------------------------------------------------------------------------------------------------------------------------------------------------------------------------------------------------------------------------------------------------------------------------------------------------------------------------------------------------------------------------------------------------------------------------------------------------------------------------------------------------------------------------------------------------------------------------|----------------------------------------------------------------------------------------------------------------------------------------------------------------------------------------------|
| 95  | Q8IVL5 | P3H2_HUMAN  | P3H2 LEPREL1 MLAT4   | Prolyl 3-hydroxylase 2 (EC 1.14.11.7) (Leprecan-like protein 1) (Myxoid liposarcoma-associated protein 4)                                               | H580-D582-H652 | 1 Fe cation | Catalytic | 1.14.11.7  | Endoplasmic reticulum, Golgi apparatus | No  | DISEASE: Myopia, high, with cataract and vitreoretinal degeneration (MVD) [MIM:614292]: A disorder characterized by severe myopia with variable expressivity of cataract and vitreoretinal degeneration. Some patients manifest lens subluxation, lens instability and retinal detachment. {ECO:0000269 PubMed:21885030}. Note=The disease is caused by mutations affecting the gene represented in this entry.                                                                                                                                                                                                                                                                                                                                                                                                             | collagen metabolic process [GO:0032963]; negative regulation of cell proliferation [GO:0008285]; peptidyl-proline hydroxylation [GO:0019511]                                                 |
| 96  | Q8IVL6 | P3H3_HUMAN  | P3H3 LEPREL2         | Prolyl 3-hydroxylase 3 (EC 1.14.11.7) (Leprecan-like protein 2) (Protein B)                                                                             | H584-D586-H656 | 1 Fe cation | Catalytic | 1.14.11.7  | Endoplasmic reticulum                  | No  |                                                                                                                                                                                                                                                                                                                                                                                                                                                                                                                                                                                                                                                                                                                                                                                                                             | collagen metabolic process [GO:0032963]; negative regulation of cell proliferation [GO:0008285]                                                                                              |
| 97  | P13674 | P4HA1_HUMAN | P4HA1 P4HA           | Prolyl 4-hydroxylase subunit alpha-1 (4-PH alpha-1) (EC 1.14.11.2) (Procollagen-proline,2-oxoglutarate-4-dioxygenase subunit alpha-1)                   | H429-D431-H500 | 1 Fe cation | Catalytic | 1.14.11.2  | Endoplasmic reticulum                  | No  |                                                                                                                                                                                                                                                                                                                                                                                                                                                                                                                                                                                                                                                                                                                                                                                                                             | collagen fibril organization [GO:0030199]; peptidyl-proline hydroxylation to 4-hydroxy-L-proline [GO:0018401]                                                                                |
| 98  | O15460 | P4HA2_HUMAN | P4HA2 UNQ290/PRO330  | Prolyl 4-hydroxylase subunit alpha-2 (4-PH alpha-2) (EC 1.14.11.2) (Procollagen-proline,2-oxoglutarate-4-dioxygenase subunit alpha-2)                   | H430-D432-H501 | 1 Fe cation | Catalytic | 1.14.11.2  | Endoplasmic reticulum                  | No  | DISEASE: Myopia 25, autosomal dominant (MYP25) [MIM:617238]: A refractive error of the eye, in which parallel rays from a distant object come to focus in front of the retina, vision being better for near objects than for far. {ECO:0000269 PubMed:25741866}. Note=The disease is caused by mutations affecting the gene represented in this entry.                                                                                                                                                                                                                                                                                                                                                                                                                                                                      |                                                                                                                                                                                              |
| 99  | Q7Z4N8 | P4HA3_HUMAN | P4HA3 UNQ711/PRO1374 | Prolyl 4-hydroxylase subunit alpha-3 (4-PH alpha-3) (EC 1.14.11.2) (Procollagen-proline,2-oxoglutarate-4-dioxygenase subunit alpha-3)                   | H440-D442-H510 | 1 Fe cation | Catalytic | 1.14.11.2  | Endoplasmic reticulum                  | No  |                                                                                                                                                                                                                                                                                                                                                                                                                                                                                                                                                                                                                                                                                                                                                                                                                             |                                                                                                                                                                                              |
| 100 | Q9NXG6 | P4HTM_HUMAN | P4HTM PH4            | Transmembrane prolyl 4-hydroxylase (P4H-TM) (EC 1.14.11.-) (Hypoxia-inducible factor prolyl hydroxylase 4) (HIF-PH4) (HIF-prolyl hydroxylase 4) (HPH-4) | H328-D330-H441 | 1 Fe cation | Catalytic | 1.14.11.-  | Endoplasmic reticulum                  | Yes |                                                                                                                                                                                                                                                                                                                                                                                                                                                                                                                                                                                                                                                                                                                                                                                                                             | regulation of erythrocyte differentiation [GO:0045646]                                                                                                                                       |
| 101 | O14832 | PAHX_HUMAN  | PHYH PAHX            | Phytanoyl-CoA dioxygenase, peroxisomal (EC 1.14.11.18) (Phytanic acid oxidase) (Phytanoyl-CoA alpha-hydroxylase) (PhyH)                                 | H175-D177-H264 | 1 Fe cation | Catalytic | 1.14.11.18 | Peroxisome                             | No  | DISEASE: Refsum disease (RD) [MIM:266500]: A rare autosomal recessive peroxisomal disorder characterized by the accumulation of the branched-chain fatty acid, phytanic acid, in blood and tissues. Cardinal clinical features are retinitis pigmentosa, peripheral neuropathy, cerebellar ataxia, and elevated protein levels in the cerebrospinal fluid (CSF). Half of all patients exhibit generalized, mild to moderate ichthyosis resembling ichthyosis vulgaris. Less constant features are nerve deafness, anosmia, skeletal abnormalities, cataracts and cardiac impairment. {ECO:0000269 PubMed:10709665, ECO:0000269 PubMed:10767344, ECO:0000269 PubMed:14974078, ECO:0000269 PubMed:9326939, ECO:0000269 PubMed:9326940}. Note=The disease is caused by mutations affecting the gene represented in this entry. | 2-oxoglutarate metabolic process [GO:0006103]; fatty acid alpha-oxidation [GO:0001561]; isoprenoid metabolic process [GO:0006720]; methyl-branched fatty acid metabolic process [GO:0097089] |

|     |        |             |                       |                                                                                              |                     |             |           |            |                       |     |                                                                                                                                                                                                                                                                                                                                                                                                                                                                                                                                                                                                                                                                                                                                                                                                                                                                                                                                                                                                                                                                                                                       |                                                                                                                                                                                                                                                                                                                                                                                                                                                                                                                               |
|-----|--------|-------------|-----------------------|----------------------------------------------------------------------------------------------|---------------------|-------------|-----------|------------|-----------------------|-----|-----------------------------------------------------------------------------------------------------------------------------------------------------------------------------------------------------------------------------------------------------------------------------------------------------------------------------------------------------------------------------------------------------------------------------------------------------------------------------------------------------------------------------------------------------------------------------------------------------------------------------------------------------------------------------------------------------------------------------------------------------------------------------------------------------------------------------------------------------------------------------------------------------------------------------------------------------------------------------------------------------------------------------------------------------------------------------------------------------------------------|-------------------------------------------------------------------------------------------------------------------------------------------------------------------------------------------------------------------------------------------------------------------------------------------------------------------------------------------------------------------------------------------------------------------------------------------------------------------------------------------------------------------------------|
| 102 | P00439 | PH4H_HUMAN  | PAH                   | Phenylalanine-4-hydroxylase (PAH) (EC 1.14.16.1) (Phe-4-monooxygenase)                       | H285-H290-E330      | 1 Fe cation | Catalytic | 1.14.16.1  | Unknown               | No  | DISEASE: Phenylketonuria (PKU) [MIM:261600]: Autosomal recessive inborn error of phenylalanine metabolism, due to severe phenylalanine hydroxylase deficiency. It is characterized by blood concentrations of phenylalanine persistently above 1200 mumol (normal concentration 100 mumol) which usually causes mental retardation (unless low phenylalanine diet is introduced early in life). They tend to have light pigmentation, rashes similar to eczema, epilepsy, extreme hyperactivity, psychotic states and an unpleasant 'mousy' odor. [ECO:0000269] PubMed:10200057, ECO:0000269   PubMed:10679941, ECO:0000269   PubMed:11180595, ECO:0000269   PubMed:11326337, ECO:0000269   PubMed:11385716, ECO:0000269   PubMed:11461196, ECO:0000269   PubMed:12501224, ECO:0000269   PubMed:1355066, ECO:0000269   PubMed:1363837, ECO:0000269   PubMed:1363838, ECO:0000269   PubMed:1671810, ECO:0000269   PubMed:1672290, ECO:0000269   PubMed:1672294, ECO:0000269   PubMed:1679030, ECO:0000269   PubMed:1709636, ECO:0000269   PubMed:18538294, ECO:0000269   PubMed:1975559, ECO:0000269   PubMed:2014802, | catecholamine biosynthetic process [GO:0042423]; cellular amino acid biosynthetic process [GO:0008652]; L-phenylalanine catabolic process [GO:0006559]; neurotransmitter biosynthetic process [GO:0042136]                                                                                                                                                                                                                                                                                                                    |
| 103 | O75151 | PHF2_HUMAN  | PHF2 CENP-35 KIAA0662 | Lysine-specific demethylase PHF2 (EC 1.14.11.-) (GRCS) (PHD finger protein 2)                | H249-D251-Y321      | 1 Fe cation | Catalytic | 1.14.11.-  | Nucleus               | No  |                                                                                                                                                                                                                                                                                                                                                                                                                                                                                                                                                                                                                                                                                                                                                                                                                                                                                                                                                                                                                                                                                                                       | liver development [GO:0001889]; negative regulation of chromatin silencing at rDNA [GO:0061188]; protein demethylation [GO:0006482]; transcription, DNA-templated [GO:0006351]                                                                                                                                                                                                                                                                                                                                                |
| 104 | Q9UPP1 | PHF8_HUMAN  | PHF8 KIAA1111 ZNF422  | Histone lysine demethylase PHF8 (EC 1.14.11.27) (PHD finger protein 8)                       | H283-D285-Y293-H355 | 1 Fe cation | Catalytic | 1.14.11.27 | Nucleus               | No  | DISEASE: Mental retardation, X-linked, syndromic, Siderius type (MRXSSD) [MIM:300263]: A syndrome characterized by mild to borderline mental retardation with or without cleft lip/cleft palate. [ECO:0000269] PubMed:16199551, ECO:0000269   PubMed:17661819, ECO:0000269   PubMed:20101266, ECO:0000269   PubMed:20208542, ECO:0000269   PubMed:20346720, ECO:0000269   PubMed:20421419, ECO:0000269   PubMed:20548336, ECO:0000269   PubMed:20622853, ECO:0000269   PubMed:20622854). Note=The disease is caused by mutations affecting the gene represented in this entry.                                                                                                                                                                                                                                                                                                                                                                                                                                                                                                                                        | brain development [GO:0007420]; G1/S transition of mitotic cell cycle [GO:0000082]; histone H3-K27 demethylation [GO:0071557]; histone H3-K36 demethylation [GO:0070544]; histone H3-K9 demethylation [GO:0033169]; histone H4-K20 demethylation [GO:0035574]; negative regulation of chromatin silencing at rDNA [GO:0061188]; positive regulation of transcription, DNA-templated [GO:0045893]; positive regulation of transcription from RNA polymerase I promoter [GO:0045943]; transcription, DNA-templated [GO:0006351] |
| 105 | Q5SRE7 | PHYD1_HUMAN | PHYHD1                | Phytanoyl-CoA dioxygenase domain-containing protein 1 (EC 1.-.-.-)                           | H156-D158-H246      | 1 Fe cation | Catalytic | 1.-.-.-    | Unknown               | No  |                                                                                                                                                                                                                                                                                                                                                                                                                                                                                                                                                                                                                                                                                                                                                                                                                                                                                                                                                                                                                                                                                                                       |                                                                                                                                                                                                                                                                                                                                                                                                                                                                                                                               |
| 106 | O00625 | PIR_HUMAN   | PIR                   | Pirin (EC 1.13.11.24) (Probable quercetin 2,3-dioxygenase PIR) (Probable quercetinase)       | H56-H58-H101-E103   | 1 Fe cation | Catalytic | 1.13.11.24 | Cytoplasm, Nucleus    | No  |                                                                                                                                                                                                                                                                                                                                                                                                                                                                                                                                                                                                                                                                                                                                                                                                                                                                                                                                                                                                                                                                                                                       | monocyte differentiation [GO:0030224]; regulation of transcription, DNA-templated [GO:0006355]; transcription from RNA polymerase II promoter [GO:0006366]                                                                                                                                                                                                                                                                                                                                                                    |
| 107 | Q02809 | PLOD1_HUMAN | PLOD1 LLH PLOD        | Procollagen-lysine,2-oxoglutarate 5-dioxygenase 1 (EC 1.14.11.4) (Lysyl hydroxylase 1) (LH1) | H656-D658-H708      | 1 Fe cation | Catalytic | 1.14.11.4  | Endoplasmic reticulum | Yes | DISEASE: Ehlers-Danlos syndrome 6 (EDS6) [MIM:225400]: A connective tissue disorder characterized by generalized joint hypermobility, hyperextensible skin, atrophic cutaneous scars due to tissue fragility, progressive kyphoscoliosis already present at birth, ocular manifestations, arterial rupture, easy bruising, severe neonatal muscle hypotonia and delayed motor development. [ECO:0000269] PubMed:10686424, ECO:0000269   PubMed:15666309, ECO:0000269   PubMed:15854030, ECO:0000269   PubMed:15979919, ECO:0000269   PubMed:8163671, ECO:0000269   PubMed:9617436). Note=The disease is caused by mutations affecting the gene represented in this entry.                                                                                                                                                                                                                                                                                                                                                                                                                                             | cellular protein modification process [GO:0006464]; epidermis development [GO:0008544]; hydroxylysine biosynthetic process [GO:0046947]; oxidation-reduction process [GO:0055114]; peptidyl-lysine hydroxylation [GO:0017185]; response to hypoxia [GO:0001666]                                                                                                                                                                                                                                                               |

|     |        |             |              |                                                                                              |                |             |           |           |                       |     |                                                                                                                                                                                                                                                                                                                                                                                                                                                                                                                                                                                                                                                                                                                                                                                                                                                                                                                                                                                                                                                                                                                                                                                                                        |                                                                                                                                                                                                                                                                                                                                                                                                                                                                                                                                                                                                                                                                                                                                                                                                                                                                                                                  |
|-----|--------|-------------|--------------|----------------------------------------------------------------------------------------------|----------------|-------------|-----------|-----------|-----------------------|-----|------------------------------------------------------------------------------------------------------------------------------------------------------------------------------------------------------------------------------------------------------------------------------------------------------------------------------------------------------------------------------------------------------------------------------------------------------------------------------------------------------------------------------------------------------------------------------------------------------------------------------------------------------------------------------------------------------------------------------------------------------------------------------------------------------------------------------------------------------------------------------------------------------------------------------------------------------------------------------------------------------------------------------------------------------------------------------------------------------------------------------------------------------------------------------------------------------------------------|------------------------------------------------------------------------------------------------------------------------------------------------------------------------------------------------------------------------------------------------------------------------------------------------------------------------------------------------------------------------------------------------------------------------------------------------------------------------------------------------------------------------------------------------------------------------------------------------------------------------------------------------------------------------------------------------------------------------------------------------------------------------------------------------------------------------------------------------------------------------------------------------------------------|
| 108 | O00469 | PLOD2_HUMAN | PLOD2        | Procollagen-lysine,2-oxoglutarate 5-dioxygenase 2 (EC 1.14.11.4) (Lysyl hydroxylase 2) (LH2) | H666-D668-H718 | 1 Fe cation | Catalytic | 1.14.11.4 | Endoplasmic reticulum | Yes | DISEASE: Bruck syndrome 2 (BRKS2) [MIM:609220]: An autosomal recessive disease characterized by generalized osteopenia, congenital joint contractures, fragile bones with onset of fractures in infancy or early childhood, short stature, severe limb deformity, progressive scoliosis, and pterygia. It is distinguished from osteogenesis imperfecta by the absence of hearing loss and dentinogenesis imperfecta, and by the presence of clubfoot and congenital joint limitations. {ECO:0000269 PubMed:12881513, ECO:0000269 PubMed:15523624}. Note=The disease is caused by mutations affecting the gene represented in this entry. The molecular defect leading to Bruck syndrome is an aberrant cross-linking of bone collagen, due to underhydroxylation of lysine residues within the telopeptides of type I collagen, whereas the lysine residues in the triple helix are normal.; DISEASE: Note=PLOD2 mutations give rise to a broad variety of phenotypes with variable degrees of severity of bone fragility and joint contractures. Disease-associated mutations have been found in patients with autosomal recessive osteogenesis imperfecta (AR-OI) (PubMed:22689593). {ECO:0000269 PubMed:22689593}. | cellular protein modification process [GO:0006464]; hydroxylysine biosynthetic process [GO:0046947]; peptidyl-lysine hydroxylation [GO:0017185]; response to hypoxia [GO:0001666]                                                                                                                                                                                                                                                                                                                                                                                                                                                                                                                                                                                                                                                                                                                                |
| 109 | O60568 | PLOD3_HUMAN | PLOD3        | Procollagen-lysine,2-oxoglutarate 5-dioxygenase 3 (EC 1.14.11.4) (Lysyl hydroxylase 3) (LH3) | H667-D669-H719 | 1 Fe cation | Catalytic | 1.14.11.4 | Endoplasmic reticulum | Yes | DISEASE: Lysyl hydroxylase 3 deficiency (LH3 deficiency) [MIM:612394]: Connective tissue disorder. The syndrome is characterized by congenital malformations severely affecting many tissues and organs and revealing features of several collagen disorders, most of them involving COL2A1 (type II collagen). The findings suggest that the failure of lysyl hydroxylation and hydroxylysyl carbohydrate addition, which affects many collagens, is the molecular basis of this syndrome. {ECO:0000269 PubMed:18834968}. Note=The disease is caused by mutations affecting the gene represented in this entry.                                                                                                                                                                                                                                                                                                                                                                                                                                                                                                                                                                                                       | basement membrane assembly [GO:0070831]; cellular response to hormone stimulus [GO:0032870]; collagen fibril organization [GO:0030199]; endothelial cell morphogenesis [GO:0001886]; epidermis morphogenesis [GO:0048730]; hydroxylysine biosynthetic process [GO:0046947]; in utero embryonic development [GO:0001701]; lung morphogenesis [GO:0060425]; neural tube development [GO:0021915]; peptidyl-lysine hydroxylation [GO:0017185]; protein localization [GO:0008104]; protein O-linked glycosylation [GO:0006493]; vasodilation [GO:0042311]                                                                                                                                                                                                                                                                                                                                                            |
| 110 | P62136 | PP1A_HUMAN  | PPP1CA PPP1A | Serine/threonine-protein phosphatase PP1-alpha catalytic subunit (PP-1A) (EC 3.1.3.16)       | D64-H66-D92    | 1 Fe cation | Catalytic | 3.1.3.16  | Cytoplasm, Nucleus    | No  |                                                                                                                                                                                                                                                                                                                                                                                                                                                                                                                                                                                                                                                                                                                                                                                                                                                                                                                                                                                                                                                                                                                                                                                                                        | beta-catenin destruction complex disassembly [GO:1904886]; branching morphogenesis of an epithelial tube [GO:0048754]; cell cycle [GO:0007049]; cell division [GO:0051301]; circadian regulation of gene expression [GO:0032922]; dephosphorylation [GO:0016311]; entrainment of circadian clock by photoperiod [GO:0043153]; glycogen metabolic process [GO:0005977]; lung development [GO:0030324]; negative regulation of protein binding [GO:0032091]; positive regulation of extrinsic apoptotic signaling pathway in absence of ligand [GO:2001241]; protein dephosphorylation [GO:0006470]; regulation of canonical Wnt signaling pathway [GO:0060828]; regulation of circadian rhythm [GO:0042752]; regulation of glycogen biosynthetic process [GO:0005979]; regulation of glycogen catabolic process [GO:0005981]; regulation of translational initiation by eIF2 alpha dephosphorylation [GO:0036496] |

|     |        |             |                          |                                                                                                                                                                                                                               |                                      |              |           |          |                        |     |                                                                                                                                                                                                                                                                                                                                                                                                                                                                                                                                                                                                                                                                                                                                              |                                                                                                                                                                                                                                                                                                                                                                                                                                                                                                                                                                                                                                                                                                                                                                                                                                                                                                                                                                                                                                                                                                                                                                                                                                                                                                                                                                                                                                                                                                                                                                                                                 |
|-----|--------|-------------|--------------------------|-------------------------------------------------------------------------------------------------------------------------------------------------------------------------------------------------------------------------------|--------------------------------------|--------------|-----------|----------|------------------------|-----|----------------------------------------------------------------------------------------------------------------------------------------------------------------------------------------------------------------------------------------------------------------------------------------------------------------------------------------------------------------------------------------------------------------------------------------------------------------------------------------------------------------------------------------------------------------------------------------------------------------------------------------------------------------------------------------------------------------------------------------------|-----------------------------------------------------------------------------------------------------------------------------------------------------------------------------------------------------------------------------------------------------------------------------------------------------------------------------------------------------------------------------------------------------------------------------------------------------------------------------------------------------------------------------------------------------------------------------------------------------------------------------------------------------------------------------------------------------------------------------------------------------------------------------------------------------------------------------------------------------------------------------------------------------------------------------------------------------------------------------------------------------------------------------------------------------------------------------------------------------------------------------------------------------------------------------------------------------------------------------------------------------------------------------------------------------------------------------------------------------------------------------------------------------------------------------------------------------------------------------------------------------------------------------------------------------------------------------------------------------------------|
| 111 | Q08209 | PP2BA_HUMAN | PPP3CA CALNA CNA         | Serine/threonine-protein phosphatase 2B catalytic subunit alpha isoform (EC 3.1.3.16) (CAM-PRP catalytic subunit) (Calmodulin-dependent calcineurin A subunit alpha isoform)                                                  | D90-H92-D118                         | 1 Fe cation  | Catalytic | 3.1.3.16 | Cell membrane, Nucleus | Yes |                                                                                                                                                                                                                                                                                                                                                                                                                                                                                                                                                                                                                                                                                                                                              | calcineurin-NFAT signaling cascade [GO:0033173]; calcium ion transport [GO:0006816]; cardiac muscle hypertrophy in response to stress [GO:0014898]; cellular response to drug [GO:0035690]; cellular response to glucose stimulus [GO:0071333]; dephosphorylation [GO:0016311]; excitatory postsynaptic potential [GO:0060079]; Fc-epsilon receptor signaling pathway [GO:0038095]; G1/S transition of mitotic cell cycle [GO:0000082]; modulation of synaptic transmission [GO:0050804]; multicellular organismal response to stress [GO:0033555]; negative regulation of chromatin binding [GO:0035562]; negative regulation of dendrite morphogenesis [GO:0050774]; negative regulation of insulin secretion [GO:0046676]; negative regulation of production of miRNAs involved in gene silencing by miRNA [GO:1903799]; positive regulation of cardiac muscle hypertrophy in response to stress [GO:1903244]; positive regulation of connective tissue replacement [GO:1905205]; positive regulation of NFAT protein import into nucleus [GO:0051533]; positive regulation of sequence-specific DNA binding transcription factor activity [GO:0051091]; positive regulation of transcription from RNA polymerase II promoter [GO:0045944]; protein dephosphorylation [GO:0006470]; protein import into nucleus [GO:0006606]; response to amphetamine [GO:0001975]; response to calcium ion [GO:0051592]; skeletal muscle fiber development [GO:0048741]; T cell activation [GO:0042110]; transition between fast and slow fiber [GO:0014883]; Wnt signaling pathway, calcium modulating pathway [GO:007223] |
| 112 | P16298 | PP2BB_HUMAN | PPP3CB CALNA2 CALNB CNA2 | Serine/threonine-protein phosphatase 2B catalytic subunit beta isoform (EC 3.1.3.16) (CAM-PRP catalytic subunit) (Calmodulin-dependent calcineurin A subunit beta isoform)                                                    | D99-H101-D127                        | 1 Fe cation  | Catalytic | 3.1.3.16 | Unknown                | No  |                                                                                                                                                                                                                                                                                                                                                                                                                                                                                                                                                                                                                                                                                                                                              | axon extension [GO:0048675]; calcineurin-NFAT signaling cascade [GO:0033173]; calcium ion regulated exocytosis [GO:0017156]; cellular response to drug [GO:0035690]; dephosphorylation [GO:0016311]; Fc-epsilon receptor signaling pathway [GO:0038095]; heart development [GO:0007507]; learning [GO:0007612]; locomotion involved in locomotory behavior [GO:0031987]; lymphangiogenesis [GO:0001946]; memory [GO:0007613]; negative regulation of T cell mediated cytotoxicity [GO:0001915]; positive regulation of insulin secretion involved in cellular response to glucose stimulus [GO:0035774]; positive regulation of NFAT protein import into nucleus [GO:0051533]; positive regulation of transcription, DNA-templated [GO:0045893]; positive regulation of transcription from RNA polymerase II promoter [GO:0045944]; protein dephosphorylation [GO:0006470]; protein phosphorylation [GO:0006468]; regulation of insulin secretion [GO:0050796]; regulation of synaptic plasticity [GO:0048167]; response to cytokine [GO:0034097]; signal transduction [GO:0007165]; social behavior [GO:0035176]; T cell activation [GO:0042110]; T cell differentiation [GO:0030217]; T cell homeostasis [GO:0043029]; T cell proliferation [GO:0042098]; Wnt signaling pathway, calcium modulating pathway [GO:007223]                                                                                                                                                                                                                                                                                       |
| 113 | P48454 | PP2BC_HUMAN | PPP3CC CALNA3 CNA3       | Serine/threonine-protein phosphatase 2B catalytic subunit gamma isoform (EC 3.1.3.16) (CAM-PRP catalytic subunit) (Calcineurin, testis-specific catalytic subunit) (Calmodulin-dependent calcineurin A subunit gamma isoform) | D86-H88-D114                         | 1 Fe cation  | Catalytic | 3.1.3.16 | Unknown                | No  |                                                                                                                                                                                                                                                                                                                                                                                                                                                                                                                                                                                                                                                                                                                                              | brain development [GO:0007420]; positive regulation of protein insertion into mitochondrial membrane involved in apoptotic signaling pathway [GO:1900740]                                                                                                                                                                                                                                                                                                                                                                                                                                                                                                                                                                                                                                                                                                                                                                                                                                                                                                                                                                                                                                                                                                                                                                                                                                                                                                                                                                                                                                                       |
| 114 | P13686 | PPA5_HUMAN  | ACPS                     | Tartrate-resistant acid phosphatase type 5 (TR-AP) (EC 3.1.3.2) (Tartrate-resistant acid ATPase) (TrATPase) (Type 5 acid phosphatase)                                                                                         | D33-D71-Y74-H242; D71-N110-H205-H240 | 2 Fe cations | Catalytic | 3.1.3.2  | Unknown                | No  | DISEASE: Spondyloenchondrodysplasia with immune dysregulation (SPENDI) [MIM:607944]: A disease characterized by vertebral and metaphyseal dysplasia, spasticity with cerebral calcifications, and strong predisposition to autoimmune diseases. The skeletal dysplasia is characterized by radiolucent and irregular spondylar and metaphyseal lesions that represent islands of chondroid tissue within bone. [ECO:0000269 PubMed:21217752, ECO:0000269 PubMed:21217755]. Note=The disease is caused by mutations affecting the gene represented in this entry. ACPS inactivating mutations result in a functional excess of phosphorylated osteopontin causing deregulation of osteopontin signaling and consequential autoimmune disease. | riboflavin metabolic process [GO:0006771]                                                                                                                                                                                                                                                                                                                                                                                                                                                                                                                                                                                                                                                                                                                                                                                                                                                                                                                                                                                                                                                                                                                                                                                                                                                                                                                                                                                                                                                                                                                                                                       |

|     |        |              |                             |                                                                                                                                                                                                                                                                                                                              |                                     |                   |                          |                       |                    |    |                                                                                                                                                                                                                                                                                                                                                                                                                                                                                                                                                                                                                                                                                                                                                                                                                                                                                                                                                                                                                                                                                                                                                                                                                                                                                                                                                                                                                                                                                                                                                                                 |                                                                                                                                                                                                                                                                                                                                                                                                                                                                                                                |
|-----|--------|--------------|-----------------------------|------------------------------------------------------------------------------------------------------------------------------------------------------------------------------------------------------------------------------------------------------------------------------------------------------------------------------|-------------------------------------|-------------------|--------------------------|-----------------------|--------------------|----|---------------------------------------------------------------------------------------------------------------------------------------------------------------------------------------------------------------------------------------------------------------------------------------------------------------------------------------------------------------------------------------------------------------------------------------------------------------------------------------------------------------------------------------------------------------------------------------------------------------------------------------------------------------------------------------------------------------------------------------------------------------------------------------------------------------------------------------------------------------------------------------------------------------------------------------------------------------------------------------------------------------------------------------------------------------------------------------------------------------------------------------------------------------------------------------------------------------------------------------------------------------------------------------------------------------------------------------------------------------------------------------------------------------------------------------------------------------------------------------------------------------------------------------------------------------------------------|----------------------------------------------------------------------------------------------------------------------------------------------------------------------------------------------------------------------------------------------------------------------------------------------------------------------------------------------------------------------------------------------------------------------------------------------------------------------------------------------------------------|
| 115 | Q7KZA3 | Q7KZA3_HUMAN | DKFZp686P18130              | Ferrochelatase                                                                                                                                                                                                                                                                                                               | Unknown                             | 1 Fe cation       | Substrate - biosyntheses | 4.99.1.1              | Unknown            | No |                                                                                                                                                                                                                                                                                                                                                                                                                                                                                                                                                                                                                                                                                                                                                                                                                                                                                                                                                                                                                                                                                                                                                                                                                                                                                                                                                                                                                                                                                                                                                                                 | ferrochelatase activity                                                                                                                                                                                                                                                                                                                                                                                                                                                                                        |
| 116 | Q9H6W3 | RIOX1_HUMAN  | RIOX1 C14orf169 MAPJD NO66  | Ribosomal oxygenase 1 (60S ribosomal protein L8 histidine hydroxylase) (Bifunctional lysine-specific demethylase and histidyl-hydroxylase NO66) (EC 1.14.11.-) (EC 1.14.11.27) (Histone lysine demethylase NO66) (Myc-associated protein with JmjC domain) (Nucleolar protein 66) (hsNO66) (Ribosomal oxygenase NO66) (ROX)  | H340-D342-H405                      | 1 Fe cation       | Catalytic                | 1.14.11.-; 1.14.11.27 | Nucleus            | No |                                                                                                                                                                                                                                                                                                                                                                                                                                                                                                                                                                                                                                                                                                                                                                                                                                                                                                                                                                                                                                                                                                                                                                                                                                                                                                                                                                                                                                                                                                                                                                                 | chromatin remodeling [GO:0006338]; histone H3-K36 demethylation [GO:0070544]; histone H3-K4 demethylation [GO:0034720]; negative regulation of osteoblast differentiation [GO:0045668]; negative regulation of transcription, DNA-templated [GO:0045892]; peptidyl-arginine hydroxylation [GO:0030961]; transcription, DNA-templated [GO:0006351]                                                                                                                                                              |
| 117 | Q8IUF8 | RIOX2_HUMAN  | RIOX2 MDIG MINA MINA53 NOS2 | Ribosomal oxygenase 2 (60S ribosomal protein L27a histidine hydroxylase) (Bifunctional lysine-specific demethylase and histidyl-hydroxylase MINA) (EC 1.14.11.-) (Histone lysine demethylase MINA) (MYC-induced nuclear antigen) (Mineral dust-induced gene protein) (Nucleolar protein 52) (Ribosomal oxygenase MINA) (ROX) | H179-D181-H240                      | 1 Fe cation       | Catalytic                | 1.14.11.-             | Nucleus            | No |                                                                                                                                                                                                                                                                                                                                                                                                                                                                                                                                                                                                                                                                                                                                                                                                                                                                                                                                                                                                                                                                                                                                                                                                                                                                                                                                                                                                                                                                                                                                                                                 | chromatin remodeling [GO:0006338]; negative regulation of transcription, DNA-templated [GO:0045892]; peptidyl-arginine hydroxylation [GO:0030961]; ribosome biogenesis [GO:0042254]; transcription, DNA-templated [GO:0006351]                                                                                                                                                                                                                                                                                 |
| 118 | P31350 | RIR2_HUMAN   | RRM2 RR2                    | Ribonucleoside-diphosphate reductase subunit M2 (EC 1.17.4.1) (Ribonucleotide reductase small chain) (Ribonucleotide reductase small subunit)                                                                                                                                                                                | D138-E169-H172; E169-E232-E266-H269 | 2 Fe cations      | Catalytic                | 1.17.4.1              | Cytoplasm          | No |                                                                                                                                                                                                                                                                                                                                                                                                                                                                                                                                                                                                                                                                                                                                                                                                                                                                                                                                                                                                                                                                                                                                                                                                                                                                                                                                                                                                                                                                                                                                                                                 | deoxyribonucleotide biosynthetic process [GO:0009263]; DNA replication [GO:0006260]; G1/S transition of mitotic cell cycle [GO:0000082]; nucleobase-containing small molecule interconversion [GO:0015949]; protein heterotetramerization [GO:0051290]; regulation of transcription involved in G1/S transition of mitotic cell cycle [GO:0000083]                                                                                                                                                             |
| 119 | Q7LG56 | RIR2B_HUMAN  | RRM2B P53R2                 | Ribonucleoside-diphosphate reductase subunit M2 B (EC 1.17.4.1) (TP53-inducible ribonucleotide reductase M2 B) (p53-inducible ribonucleotide reductase small subunit 2-like protein) (p53R2)                                                                                                                                 | D100-E131-H134; E131-E194-E228-H231 | 2 Fe cations      | Catalytic                | 1.17.4.1              | Cytoplasm, Nucleus | No | DISEASE: Mitochondrial DNA depletion syndrome 8A (MTDPS8A) [MIM:612075]: A disorder due to mitochondrial dysfunction characterized by various combinations of neonatal hypotonia, neurological deterioration, respiratory distress, lactic acidosis, and renal tubulopathy. [ECO:0000269] PubMed:17486094, ECO:0000269] PubMed:18504129). Note=The disease is caused by mutations affecting the gene represented in this entry.; DISEASE: Mitochondrial DNA depletion syndrome 8B (MTDPS8B) [MIM:612075]: A disease due to mitochondrial dysfunction and characterized by ophthalmoplegia, ptosis, gastrointestinal dysmotility, cachexia, peripheral neuropathy. [ECO:0000269] PubMed:19667227). Note=The disease is caused by mutations affecting the gene represented in this entry.; DISEASE: Progressive external ophthalmoplegia with mitochondrial DNA deletions, autosomal dominant, 5 (PEOA5) [MIM:613077]: A disorder characterized by progressive weakness of ocular muscles and levator muscle of the upper eyelid. In a minority of cases, it is associated with skeletal myopathy, which predominantly involves axial or proximal muscles and which causes abnormal fatigability and even permanent muscle weakness. Ragged-red fibers and atrophy are found on muscle biopsy. A large proportion of chronic ophthalmoplegias are associated with other symptoms, leading to a multisystemic pattern of this disease. Additional symptoms are variable, and may include cataracts, hearing loss, sensory axonal neuropathy, ataxia, depression, hypogonadism, and | deoxyribonucleoside triphosphate metabolic process [GO:0009200]; deoxyribonucleotide biosynthetic process [GO:0009263]; DNA repair [GO:0006281]; kidney development [GO:0001822]; mitochondrial DNA replication [GO:0006264]; negative regulation of intrinsic apoptotic signaling pathway by p53 class mediator [GO:1902254]; nucleobase-containing small molecule interconversion [GO:0015949]; renal system process [GO:0003014]; response to amine [GO:0014075]; response to oxidative stress [GO:0006979] |
| 120 | Q96AT9 | RPE_HUMAN    | RPE HUSSY-17                | Ribulose-phosphate 3-epimerase (EC 5.1.3.1) (Ribulose-5-phosphate-3-epimerase)                                                                                                                                                                                                                                               | H35-D37-H70-D175                    | 1 Divalent cation | Catalytic - no redox     | 5.1.3.1               | Unknown            | No |                                                                                                                                                                                                                                                                                                                                                                                                                                                                                                                                                                                                                                                                                                                                                                                                                                                                                                                                                                                                                                                                                                                                                                                                                                                                                                                                                                                                                                                                                                                                                                                 | carbohydrate metabolic process [GO:0005975]; cellular carbohydrate metabolic process [GO:0044262]; pentose catabolic process [GO:0019323]; pentose-phosphate shunt [GO:0006098]; pentose-phosphate shunt, non-oxidative branch [GO:0009052]                                                                                                                                                                                                                                                                    |

|     |        |             |                                    |                                                                                                                                                                                 |                                          |                   |                       |            |                          |     |                                                                                                                                                                                                                                                                                                                                                                                                                                                                                                                                                                                                                                                                                                                                                                                                                                                                                                                                                                                                                                                                                                                                                                                                                                                                                                                                    |                                                                                                                                                                                                                                                                                                                                                                                                                                                                                                                                                                 |
|-----|--------|-------------|------------------------------------|---------------------------------------------------------------------------------------------------------------------------------------------------------------------------------|------------------------------------------|-------------------|-----------------------|------------|--------------------------|-----|------------------------------------------------------------------------------------------------------------------------------------------------------------------------------------------------------------------------------------------------------------------------------------------------------------------------------------------------------------------------------------------------------------------------------------------------------------------------------------------------------------------------------------------------------------------------------------------------------------------------------------------------------------------------------------------------------------------------------------------------------------------------------------------------------------------------------------------------------------------------------------------------------------------------------------------------------------------------------------------------------------------------------------------------------------------------------------------------------------------------------------------------------------------------------------------------------------------------------------------------------------------------------------------------------------------------------------|-----------------------------------------------------------------------------------------------------------------------------------------------------------------------------------------------------------------------------------------------------------------------------------------------------------------------------------------------------------------------------------------------------------------------------------------------------------------------------------------------------------------------------------------------------------------|
| 121 | Q16518 | RPE65_HUMAN | RPE65                              | Retinoid isomerohydrolase (EC 3.1.1.64) (All-trans-retinyl-palmitate hydrolase) (Retinal pigment epithelium-specific 65 kDa protein) (Retinoid isomerase)                       | H180-H241-H313-H527                      | 1 Fe cation       | Catalytic             | 3.1.1.64   | Cytoplasm, Cell membrane | Yes | DISEASE: Leber congenital amaurosis 2 (LCA2) [MIM:204100]: A severe dystrophy of the retina, typically becoming evident in the first years of life. Visual function is usually poor and often accompanied by nystagmus, sluggish or near-absent pupillary responses, photophobia, high hyperopia and keratoconus. {ECO:0000269   PubMed:10090910, ECO:0000269   PubMed:10766140, ECO:0000269   PubMed:11462243, ECO:0000269   PubMed:14611946, ECO:0000269   PubMed:14962443, ECO:0000269   PubMed:15024725, ECO:0000269   PubMed:16205573, ECO:0000269   PubMed:17297704, ECO:0000269   PubMed:17724218, ECO:0000269   PubMed:18682808, ECO:0000269   PubMed:9326941, ECO:0000269   PubMed:9801879}. Note=The disease is caused by mutations affecting the gene represented in this entry.; DISEASE: Retinitis pigmentosa 20 (RP20) [MIM:613794]: A retinal dystrophy belonging to the group of pigmentary retinopathies. Retinitis pigmentosa is characterized by retinal pigment deposits visible on fundus examination and primary loss of rod photoreceptor cells followed by secondary loss of cone photoreceptors. Patients typically have night vision blindness and loss of midperipheral visual field. As their condition progresses, they lose their far peripheral visual field and eventually central vision as well. | cellular response to electrical stimulus [GO:0071257]; circadian rhythm [GO:0007623]; detection of light stimulus involved in visual perception [GO:0050908]; insulin receptor signaling pathway [GO:0008286]; neural retina development [GO:0003407]; regulation of rhodopsin gene expression [GO:0007468]; retina homeostasis [GO:0001895]; retinal metabolic process [GO:0042574]; retina morphogenesis in camera-type eye [GO:0060042]; retinoid metabolic process [GO:0001523]; visual perception [GO:0007601]; vitamin A metabolic process [GO:0006776]   |
| 122 | Q2QD12 | RPEL1_HUMAN | RPEL1                              | Ribulose-phosphate 3-epimerase-like protein 1 (EC 5.1.3.1) (Ribulose-5-phosphate-3-epimerase-like protein 1)                                                                    | H35-D37-H70-D175                         | 1 Divalent cation | Catalytic - no redox  | 5.1.3.1    | Unknown                  | No  |                                                                                                                                                                                                                                                                                                                                                                                                                                                                                                                                                                                                                                                                                                                                                                                                                                                                                                                                                                                                                                                                                                                                                                                                                                                                                                                                    | cellular carbohydrate metabolic process [GO:0044262]; pentose catabolic process [GO:0019323]; pentose-phosphate shunt, non-oxidative branch [GO:0009052]                                                                                                                                                                                                                                                                                                                                                                                                        |
| 123 | Q9NP59 | S40A1_HUMAN | SLC40A1 FPN1 IREG1 SLC11A3 MSTP079 | Solute carrier family 40 member 1 (Ferroportin-1) (Iron-regulated transporter 1)                                                                                                | Unknown                                  | Unknown           | Substrate - transport |            | Cell membrane            | Yes | DISEASE: Hemochromatosis 4 (HFE4) [MIM:606069]: A disorder of iron metabolism characterized by iron overload. Excess iron is deposited in a variety of organs leading to their failure, and resulting in serious illnesses including cirrhosis, hepatomas, diabetes, cardiomyopathy, arthritis, and hypogonadotropic hypogonadism. Severe effects of the disease usually do not appear until after decades of progressive iron loading. {ECO:0000269   PubMed:10747949, ECO:0000269   PubMed:11431687, ECO:0000269   PubMed:11518736, ECO:0000269   PubMed:12091366, ECO:0000269   PubMed:12091367, ECO:0000269   PubMed:12123233, ECO:0000269   PubMed:12406098, ECO:0000269   PubMed:12730114, ECO:0000269   PubMed:12857562, ECO:0000269   PubMed:12865285, ECO:0000269   PubMed:15338274, ECO:0000269   PubMed:15466004, ECO:0000269   PubMed:16351644}. Note=The disease is caused by mutations affecting the gene represented in this entry.                                                                                                                                                                                                                                                                                                                                                                                 | cellular iron ion homeostasis [GO:0006879]; endothelium development [GO:0003158]; ferrous iron export across plasma membrane [GO:1903988]; iron ion transmembrane transport [GO:0034755]; lymphocyte homeostasis [GO:0002260]; multicellular organismal iron ion homeostasis [GO:0060586]; negative regulation of apoptotic process [GO:0043066]; positive regulation of transcription by RNA polymerase II [GO:0045944]; regulation of transcription from RNA polymerase II promoter in response to iron [GO:0034395]; spleen trabecula formation [GO:0060345] |
| 124 | O75845 | SC5D_HUMAN  | SC5D SC5DL                         | Lathosterol oxidase (EC 1.14.19.20) (C-5 sterol desaturase) (Delta(7)-sterol 5-desaturase) (Delta(7)-sterol C5(6)-desaturase) (Lathosterol 5-desaturase) (Sterol-C5-desaturase) | H138-H142-H151-H155; H209-H228-H232-H233 | 2 Fe cations      | Catalytic             | 1.14.19.20 | Endoplasmic reticulum    | Yes | DISEASE: Lathosterolosis (LATHST) [MIM:607330]: Autosomal recessive disorder characterized by a complex phenotype, including multiple congenital anomalies, mental retardation, and liver disease. {ECO:0000269   PubMed:12189593, ECO:0000269   PubMed:12812989}. Note=The disease is caused by mutations affecting the gene represented in this entry.                                                                                                                                                                                                                                                                                                                                                                                                                                                                                                                                                                                                                                                                                                                                                                                                                                                                                                                                                                           | cholesterol biosynthetic process via desmosterol [GO:0033489]; cholesterol biosynthetic process via lathosterol [GO:0033490]; lipid metabolic process [GO:0006629]                                                                                                                                                                                                                                                                                                                                                                                              |
| 125 | Q86SK9 | SCD5_HUMAN  | SCD5 ACOD4 SCD2 SCD4               | Stearoyl-CoA desaturase 5 (EC 1.14.19.1) (Acyl-CoA-desaturase 4) (HSCD5) (Stearoyl-CoA 9-desaturase) (Stearoyl-CoA desaturase 2)                                                | H94-H99-H131-H134; H135-H243-H272-H276   | 2 Fe cations      | Catalytic             | 1.14.19.1  | Endoplasmic reticulum    | Yes |                                                                                                                                                                                                                                                                                                                                                                                                                                                                                                                                                                                                                                                                                                                                                                                                                                                                                                                                                                                                                                                                                                                                                                                                                                                                                                                                    | long-chain fatty-acyl-CoA biosynthetic process [GO:0035338]; unsaturated fatty acid biosynthetic process [GO:0006636]                                                                                                                                                                                                                                                                                                                                                                                                                                           |

|     |        |             |                         |                                                                                                                                                                                                                                       |                                     |                    |           |            |                    |     |                                                                                                                                                                                                                                                                                                                                                                                                                                                                                                                                                                                                                                                                                                                                                                                                                                                                                                                                                                                                                                                                                                                                                                                                                                                                                                                                                                                                                                                                                                                                                                                                                                                                                   |                                                                                                                                                                                                                                                                                                                                                                                                                                                                                                                                                                                                                                                                                                                           |
|-----|--------|-------------|-------------------------|---------------------------------------------------------------------------------------------------------------------------------------------------------------------------------------------------------------------------------------|-------------------------------------|--------------------|-----------|------------|--------------------|-----|-----------------------------------------------------------------------------------------------------------------------------------------------------------------------------------------------------------------------------------------------------------------------------------------------------------------------------------------------------------------------------------------------------------------------------------------------------------------------------------------------------------------------------------------------------------------------------------------------------------------------------------------------------------------------------------------------------------------------------------------------------------------------------------------------------------------------------------------------------------------------------------------------------------------------------------------------------------------------------------------------------------------------------------------------------------------------------------------------------------------------------------------------------------------------------------------------------------------------------------------------------------------------------------------------------------------------------------------------------------------------------------------------------------------------------------------------------------------------------------------------------------------------------------------------------------------------------------------------------------------------------------------------------------------------------------|---------------------------------------------------------------------------------------------------------------------------------------------------------------------------------------------------------------------------------------------------------------------------------------------------------------------------------------------------------------------------------------------------------------------------------------------------------------------------------------------------------------------------------------------------------------------------------------------------------------------------------------------------------------------------------------------------------------------------|
| 126 | Q8NFU7 | TET1_HUMAN  | TET1 CXXC6 KIAA1676 LCX | Methylcytosine dioxygenase TET1 (EC 1.14.11.n2) (CXXC-type zinc finger protein 6) (Leukemia-associated protein with a CXXC domain) (Ten-eleven translocation 1 gene protein)                                                          | H1672-D1674-H2028                   | 1 Fe cation        | Catalytic | 1.14.11.n2 | Nucleus            | No  | DISEASE: Note=A chromosomal aberration involving TET1 may be a cause of acute leukemias (PubMed:12646957). Translocation t(10;11)(q22;q23) with KMT2A/MLL1. This is a rare chromosomal translocation 5' KMT2A/MLL1-TET1 3' (PubMed:12124344, PubMed:12646957). {ECO:0000269 PubMed:12124344, ECO:0000269 PubMed:12646957}.                                                                                                                                                                                                                                                                                                                                                                                                                                                                                                                                                                                                                                                                                                                                                                                                                                                                                                                                                                                                                                                                                                                                                                                                                                                                                                                                                        | covalent chromatin modification [GO:0016569]; DNA demethylation [GO:0080111]; inner cell mass cell differentiation [GO:0001826]; negative regulation of methylation-dependent chromatin silencing [GO:0090310]; positive regulation of cell proliferation [GO:0008284]; positive regulation of histone methylation [GO:0031062]; positive regulation of transcription from RNA polymerase II promoter [GO:0045944]; protein O-linked glycosylation [GO:0006493]; stem cell population maintenance [GO:0019827]; transcription, DNA-templated [GO:0006351]                                                                                                                                                                 |
| 127 | Q6N021 | TET2_HUMAN  | TET2 KIAA1546 Nbla00191 | Methylcytosine dioxygenase TET2 (EC 1.14.11.n2)                                                                                                                                                                                       | H1382-D1384-H1881                   | 1 Fe cation        | Catalytic | 1.14.11.n2 | Unknown            | No  | DISEASE: Note=TET2 is frequently mutated in myeloproliferative disorders (MPD). These constitute a heterogeneous group of disorders, also known as myeloproliferative diseases or myeloproliferative neoplasms (MPN), characterized by cellular proliferation of one or more hematologic cell lines in the peripheral blood, distinct from acute leukemia. Included diseases are: essential thrombocythemia, polycythemia vera, primary myelofibrosis (chronic idiopathic myelofibrosis). Bone marrow samples from patients display uniformly low levels of hmC in genomic DNA compared to bone marrow samples from healthy controls as well as hypomethylation relative to controls at the majority of differentially methylated CpG sites.; DISEASE: Polycythemia vera (PV) [MIM:263300]: A myeloproliferative disorder characterized by abnormal proliferation of all hematopoietic bone marrow elements, erythroid hyperplasia, an absolute increase in total blood volume, but also by myeloid leukocytosis, thrombocytosis and splenomegaly. Note-The disease is caused by mutations affecting the gene represented in this entry.; DISEASE: Note=TET2 is frequently mutated in systemic mastocytosis; also known as systemic mast cell disease. A condition with features in common with myeloproliferative diseases. It is a clonal disorder of the mast cell and its precursor cells. The clinical symptoms and signs of systemic mastocytosis are due to accumulation of clonally derived mast cells in different tissues, including bone marrow, skin, the gastrointestinal tract, the liver, and the spleen.; DISEASE: Myelodysplastic syndrome (MDS) [MIM:614286]: A | 5-methylcytosine catabolic process [GO:0006211]; cell cycle [GO:0007049]; cytosine metabolic process [GO:0019858]; DNA demethylation [GO:0080111]; hematopoietic stem cell homeostasis [GO:0061484]; hemoglobin metabolic process [GO:0020027]; histone H3-K4 trimethylation [GO:0080182]; kidney development [GO:0001822]; liver morphogenesis [GO:0072576]; myeloid cell differentiation [GO:0030099]; myeloid progenitor cell differentiation [GO:0002318]; positive regulation of transcription from RNA polymerase II promoter [GO:0045944]; post-embryonic development [GO:0009791]; protein O-linked glycosylation [GO:0006493]; response to organic cyclic compound [GO:0014070]; spleen development [GO:0048536] |
| 128 | O43151 | TET3_HUMAN  | TET3 KIAA0401           | Methylcytosine dioxygenase TET3 (EC 1.14.11.n2)                                                                                                                                                                                       | H942-D944-H1538                     | 1 Fe cation        | Catalytic | 1.14.11.n2 | Cytoplasm, Nucleus | No  |                                                                                                                                                                                                                                                                                                                                                                                                                                                                                                                                                                                                                                                                                                                                                                                                                                                                                                                                                                                                                                                                                                                                                                                                                                                                                                                                                                                                                                                                                                                                                                                                                                                                                   | DNA demethylation [GO:0080111]; DNA demethylation of male pronucleus [GO:0044727]; histone H3-K4 trimethylation [GO:0080182]; positive regulation of transcription from RNA polymerase II promoter [GO:0045944]; protein O-linked glycosylation [GO:0006493]                                                                                                                                                                                                                                                                                                                                                                                                                                                              |
| 129 | Q9NVH6 | TMLH_HUMAN  | TMLHE TMLH              | Trimethyllysine dioxygenase, mitochondrial (EC 1.14.11.8) (Epsilon-trimethyllysine 2-oxoglutarate dioxygenase) (Epsilon-trimethyllysine hydroxylase) (TML hydroxylase) (TML-alpha-ketoglutarate dioxygenase) (TML dioxygenase) (TMLD) | H242-D244-H389                      | 1 Fe cation        | Catalytic | 1.14.11.8  | Mitochondrion      | No  | DISEASE: Autism, X-linked 6 (AUTSX6) [MIM:300872]: A form of autism, a complex multifactorial, pervasive developmental disorder characterized by impairments in reciprocal social interaction and communication, restricted and stereotyped patterns of interests and activities, and the presence of developmental abnormalities by 3 years of age. Most individuals with autism also manifest moderate mental retardation. AUTSX6 patients may respond favorably to carnitine supplementation. {ECO:0000269 PubMed:21865298, ECO:0000269 PubMed:23092983}. Note=The disease is caused by mutations affecting the gene represented in this entry.                                                                                                                                                                                                                                                                                                                                                                                                                                                                                                                                                                                                                                                                                                                                                                                                                                                                                                                                                                                                                                | carnitine biosynthetic process [GO:0045329]; negative regulation of oxidoreductase activity [GO:0051354]                                                                                                                                                                                                                                                                                                                                                                                                                                                                                                                                                                                                                  |
| 130 | Q0P6H9 | TMM62_HUMAN | TMEM62                  | Transmembrane protein 62                                                                                                                                                                                                              | D63-H65-D99                         | 1 Fe cation        | Catalytic |            | Unknown            | Yes |                                                                                                                                                                                                                                                                                                                                                                                                                                                                                                                                                                                                                                                                                                                                                                                                                                                                                                                                                                                                                                                                                                                                                                                                                                                                                                                                                                                                                                                                                                                                                                                                                                                                                   |                                                                                                                                                                                                                                                                                                                                                                                                                                                                                                                                                                                                                                                                                                                           |
| 131 | Q6ZT21 | TMPPE_HUMAN | TMPPE                   | Transmembrane protein with metallophosphoesterase domain (EC 3.1.--)                                                                                                                                                                  | D214-H216-D246-H393; N277-H369-H391 | 2 Divalent cations | Catalytic | 3.1.--     | Unknown            | Yes |                                                                                                                                                                                                                                                                                                                                                                                                                                                                                                                                                                                                                                                                                                                                                                                                                                                                                                                                                                                                                                                                                                                                                                                                                                                                                                                                                                                                                                                                                                                                                                                                                                                                                   |                                                                                                                                                                                                                                                                                                                                                                                                                                                                                                                                                                                                                                                                                                                           |
| 132 | P17752 | TPH1_HUMAN  | TPH1 TPH TPRH TRPH      | Tryptophan 5-hydroxylase 1 (EC 1.14.16.4) (Tryptophan 5-monoxygenase 1)                                                                                                                                                               | H272-H277-E317                      | 1 Fe cation        | Catalytic | 1.14.16.4  | Unknown            | No  |                                                                                                                                                                                                                                                                                                                                                                                                                                                                                                                                                                                                                                                                                                                                                                                                                                                                                                                                                                                                                                                                                                                                                                                                                                                                                                                                                                                                                                                                                                                                                                                                                                                                                   | aromatic amino acid family metabolic process [GO:0009072]; bone remodeling [GO:0046849]; circadian rhythm [GO:0007623]; indolalkylamine biosynthetic process [GO:0046219]; mammary gland alveolus development [GO:0060749]; negative regulation of ossification [GO:0030279]; positive regulation of fat cell differentiation [GO:0045600]; response to immobilization stress [GO:0035902]; serotonin biosynthetic process [GO:0042427]                                                                                                                                                                                                                                                                                   |

|     |        |            |                  |                                                                                                                                                                                                      |                                         |              |                       |           |                                |     |                                                                                                                                                                                                                                                                                                                                                                                                                                                                                                                                                                                                                                                                                                                                                                                                                                                                                                                                                                                                                                                                                                                                                                                                                                                                                                                                                                                                                                                                                                                                                                                                               |                                                                                                                                                                                                                                                                                                                                                                                                                                                                                                                                                                                                                                                                                                                                                                                                                                                                                                                                                                                                                                                                                                                                                                                                                                                                                                                                                                                                                                                                                                                                                                                                                                                                                                                                                                                                                                                                                                                                                                                  |
|-----|--------|------------|------------------|------------------------------------------------------------------------------------------------------------------------------------------------------------------------------------------------------|-----------------------------------------|--------------|-----------------------|-----------|--------------------------------|-----|---------------------------------------------------------------------------------------------------------------------------------------------------------------------------------------------------------------------------------------------------------------------------------------------------------------------------------------------------------------------------------------------------------------------------------------------------------------------------------------------------------------------------------------------------------------------------------------------------------------------------------------------------------------------------------------------------------------------------------------------------------------------------------------------------------------------------------------------------------------------------------------------------------------------------------------------------------------------------------------------------------------------------------------------------------------------------------------------------------------------------------------------------------------------------------------------------------------------------------------------------------------------------------------------------------------------------------------------------------------------------------------------------------------------------------------------------------------------------------------------------------------------------------------------------------------------------------------------------------------|----------------------------------------------------------------------------------------------------------------------------------------------------------------------------------------------------------------------------------------------------------------------------------------------------------------------------------------------------------------------------------------------------------------------------------------------------------------------------------------------------------------------------------------------------------------------------------------------------------------------------------------------------------------------------------------------------------------------------------------------------------------------------------------------------------------------------------------------------------------------------------------------------------------------------------------------------------------------------------------------------------------------------------------------------------------------------------------------------------------------------------------------------------------------------------------------------------------------------------------------------------------------------------------------------------------------------------------------------------------------------------------------------------------------------------------------------------------------------------------------------------------------------------------------------------------------------------------------------------------------------------------------------------------------------------------------------------------------------------------------------------------------------------------------------------------------------------------------------------------------------------------------------------------------------------------------------------------------------------|
| 133 | Q8IWU9 | TPH2_HUMAN | TPH2 NTPH        | Tryptophan 5-hydroxylase 2 (EC 1.14.16.4) (Neuronal tryptophan hydroxylase) (Tryptophan 5-monoxygenase 2)                                                                                            | H318-H323-E363                          | 1 Fe cation  | Catalytic             | 1.14.16.4 | Unknown                        | No  | DISEASE: Major depressive disorder (MDD) [MIM:608516]: A common psychiatric disorder. It is a complex trait characterized by one or more major depressive episodes without a history of manic, mixed, or hypomanic episodes. A major depressive episode is characterized by at least 2 weeks during which there is a new onset or clear worsening of either depressed mood or loss of interest or pleasure in nearly all activities. Four additional symptoms must also be present including changes in appetite, weight, sleep, and psychomotor activity; decreased energy; feelings of worthlessness or guilt; difficulty thinking, concentrating, or making decisions; or recurrent thoughts of death or suicidal ideation, plans, or attempts. The episode must be accompanied by distress or impairment in social, occupational, or other important areas of functioning. {ECO:0000269 PubMed:15629698}. Note=Disease susceptibility is associated with variations affecting the gene represented in this entry.; DISEASE: Attention deficit-hyperactivity disorder 7 (ADHD7) [MIM:613003]: A neurobehavioral developmental disorder primarily characterized by the coexistence of attentional problems and hyperactivity, with each behavior occurring infrequently alone. {ECO:0000269 PubMed:18347598}. Note=Disease susceptibility is associated with variations affecting the gene represented in this entry. Naturally occurring variants of TPH2 with impaired enzyme activity could cause deficiency of serotonin production and result in an increased risk of developing behavioral disorders. | aromatic amino acid family metabolic process [GO:0009072]; cellular response to lithium ion [GO:0071285]; circadian rhythm [GO:0007623]; indolalkylamine biosynthetic process [GO:0046219]; response to activity [GO:0014823]; response to calcium ion [GO:0051592]; response to estrogen [GO:0043627]; response to glucocorticoid [GO:0051384]; response to nutrient levels [GO:0031667]; serotonin biosynthetic process [GO:0042427]                                                                                                                                                                                                                                                                                                                                                                                                                                                                                                                                                                                                                                                                                                                                                                                                                                                                                                                                                                                                                                                                                                                                                                                                                                                                                                                                                                                                                                                                                                                                           |
| 134 | P02787 | TRFE_HUMAN | TF PRO1400       | Serotransferrin (Transferrin) (Beta-1 metal-binding globulin) (Siderophilin)                                                                                                                         | D82-Y114-Y207-H268; D411-D445-Y536-H604 | 2 Fe cations | Substrate - transport |           | Extracellular space            | No  | DISEASE: Atransferrinemia (ATRAF) [MIM:209300]: A rare autosomal recessive disorder characterized by abnormal synthesis of transferrin leading to iron overload and microcytic hypochromic anemia. {ECO:0000269 PubMed:11110675, ECO:0000269 PubMed:15466165}. Note=The disease is caused by mutations affecting the gene represented in this entry.                                                                                                                                                                                                                                                                                                                                                                                                                                                                                                                                                                                                                                                                                                                                                                                                                                                                                                                                                                                                                                                                                                                                                                                                                                                          | cellular iron ion homeostasis [GO:0006879]; cellular response to iron ion [GO:0071281]; ferrous iron import across plasma membrane [GO:0098707]; iron ion homeostasis [GO:005072]; membrane organization [GO:0061024]; platelet degranulation [GO:0002576]; positive regulation of receptor-mediated endocytosis [GO:0048260]; regulation of protein stability [GO:0031647]; retina homeostasis [GO:0001895]; transferrin transport [GO:0033572]                                                                                                                                                                                                                                                                                                                                                                                                                                                                                                                                                                                                                                                                                                                                                                                                                                                                                                                                                                                                                                                                                                                                                                                                                                                                                                                                                                                                                                                                                                                                 |
| 135 | P02788 | TRFL_HUMAN | LTF GIG12 LF     | Lactotransferrin (Lactoferrin) (EC 3.4.21.-) (Growth-inhibiting protein 12) (Talaktoferrin) [Cleaved into: Lactoferricin-H (Lfcin-H); Kallocin-1; Lactoferroxin-A; Lactoferroxin-B; Lactoferroxin-C] | D79-Y111-Y211-H272; D414-Y454-Y547-H616 | 2 Fe cations | Substrate - transport | 3.4.21.-  | Cytoplasm, Extracellular space | No  |                                                                                                                                                                                                                                                                                                                                                                                                                                                                                                                                                                                                                                                                                                                                                                                                                                                                                                                                                                                                                                                                                                                                                                                                                                                                                                                                                                                                                                                                                                                                                                                                               | antibacterial humoral response [GO:0019731]; antifungal humoral response [GO:0019732]; antimicrobial humoral response [GO:0019730]; bone morphogenesis [GO:0060349]; cellular protein metabolic process [GO:0044267]; humoral immune response [GO:0006959]; innate immune response in mucosa [GO:0002227]; ion transport [GO:0006811]; iron assimilation by chelation and transport [GO:0033214]; negative regulation by host of viral process [GO:0044793]; negative regulation of apoptotic process [GO:0043066]; negative regulation of ATPase activity [GO:0032780]; negative regulation of cysteine-type endopeptidase activity [GO:2000117]; negative regulation of lipopolysaccharide-mediated signaling pathway [GO:0031665]; negative regulation of osteoclast development [GO:2001205]; negative regulation of single-species biofilm formation in or on host organism [GO:1900229]; negative regulation of tumor necrosis factor (ligand) superfamily member 11 production [GO:2000308]; negative regulation of viral genome replication [GO:0045071]; negative regulation of viral process [GO:0048525]; neutrophil degranulation [GO:0043312]; ossification [GO:0001503]; positive regulation of bone mineralization involved in bone maturation [GO:1900159]; positive regulation of chondrocyte proliferation [GO:1902732]; positive regulation of I-kappaB kinase/NF-kappaB signaling [GO:0043123]; positive regulation of NF-kappaB transcription factor activity [GO:0051092]; positive regulation of osteoblast differentiation [GO:0045669]; positive regulation of osteoblast proliferation [GO:0033690]; positive regulation of protein serine/threonine kinase activity [GO:0071902]; positive regulation of toll-like receptor 4 signaling pathway [GO:0034145]; regulation of cytokine production [GO:0001817]; regulation of tumor necrosis factor production [GO:0032680]; retina homeostasis [GO:0001895]; transcription, DNA-templated [GO:0006351] |
| 136 | P08582 | TRFM_HUMAN | MELTF MAP97 MFI2 | Melanotransferrin (Melanoma-associated antigen p97) (CD antigen CD228)                                                                                                                               | D78-Y107-Y210-H279; Y451-Y556-H625      | 2 Fe cations | Substrate - transport |           | Cell membrane                  | Yes |                                                                                                                                                                                                                                                                                                                                                                                                                                                                                                                                                                                                                                                                                                                                                                                                                                                                                                                                                                                                                                                                                                                                                                                                                                                                                                                                                                                                                                                                                                                                                                                                               | C-terminal protein lipidation [GO:0006501]; iron ion homeostasis [GO:0055072]; iron ion import [GO:0097286]; negative regulation of substrate adhesion-dependent cell spreading [GO:1900025]; positive regulation of extracellular matrix disassembly [GO:0090091]; positive regulation of plasminogen activation [GO:0010756]                                                                                                                                                                                                                                                                                                                                                                                                                                                                                                                                                                                                                                                                                                                                                                                                                                                                                                                                                                                                                                                                                                                                                                                                                                                                                                                                                                                                                                                                                                                                                                                                                                                   |



|     |        |            |              |                                                                                                                                                                            |                   |             |           |            |         |    |                                                                                                                                                                                                                                                                                                                                                                                                                                                                                                                                                                                                                                                                                                                                                                                                                                                                                                                                                                                                                               |                                                                                                                                                                                                                                                                                                                                                                                                                                                                                                                                                                                                                                                                                                                                                                                                                                                                                                                                                                                                                                                                                                                                                                                                                                                                                                                                                                                                                                                                                                                                                                                                                                                                                                                                                                                                                                                                                                                                                                           |
|-----|--------|------------|--------------|----------------------------------------------------------------------------------------------------------------------------------------------------------------------------|-------------------|-------------|-----------|------------|---------|----|-------------------------------------------------------------------------------------------------------------------------------------------------------------------------------------------------------------------------------------------------------------------------------------------------------------------------------------------------------------------------------------------------------------------------------------------------------------------------------------------------------------------------------------------------------------------------------------------------------------------------------------------------------------------------------------------------------------------------------------------------------------------------------------------------------------------------------------------------------------------------------------------------------------------------------------------------------------------------------------------------------------------------------|---------------------------------------------------------------------------------------------------------------------------------------------------------------------------------------------------------------------------------------------------------------------------------------------------------------------------------------------------------------------------------------------------------------------------------------------------------------------------------------------------------------------------------------------------------------------------------------------------------------------------------------------------------------------------------------------------------------------------------------------------------------------------------------------------------------------------------------------------------------------------------------------------------------------------------------------------------------------------------------------------------------------------------------------------------------------------------------------------------------------------------------------------------------------------------------------------------------------------------------------------------------------------------------------------------------------------------------------------------------------------------------------------------------------------------------------------------------------------------------------------------------------------------------------------------------------------------------------------------------------------------------------------------------------------------------------------------------------------------------------------------------------------------------------------------------------------------------------------------------------------------------------------------------------------------------------------------------------------|
| 137 | P07101 | TY3H_HUMAN | TH TYH       | Tyrosine 3-monooxygenase (EC 1.14.16.2) (Tyrosine 3-hydroxylase) (TH)                                                                                                      | H361-H366-E406    | 1 Fe cation | Catalytic | 1.14.16.2  | Unknown | No | DISEASE: Segawa syndrome autosomal recessive (ARSEGS) [MIM:605407]: A form of DOPA-responsive dystonia presenting in infancy or early childhood. Dystonia is defined by the presence of sustained involuntary muscle contractions, often leading to abnormal postures. Some cases present with parkinsonian symptoms in infancy. Unlike all other forms of dystonia, it is an eminently treatable condition, due to a favorable response to L-DOPA.<br>{ECO:0000269 PubMed:10585338, ECO:0000269 PubMed:11196107, ECO:0000269 PubMed:11246459, ECO:0000269 PubMed:15505183, ECO:0000269 PubMed:15747353, ECO:0000269 PubMed:16049992, ECO:0000269 PubMed:17696123, ECO:0000269 PubMed:18058633, ECO:0000269 PubMed:18554280, ECO:0000269 PubMed:19491146, ECO:0000269 PubMed:20056467, ECO:0000269 PubMed:20430833, ECO:0000269 PubMed:21940685, ECO:0000269 PubMed:22264700, ECO:0000269 PubMed:22815559, ECO:0000269 PubMed:23762320, ECO:0000269 PubMed:23939262, ECO:0000269 PubMed:24753243, ECO:0000269 PubMed:7814018, | aminergic neurotransmitter loading into synaptic vesicle [GO:0015842]; anatomical structure morphogenesis [GO:0009653]; animal organ morphogenesis [GO:0009887]; catecholamine biosynthetic process [GO:0042423]; cellular response to drug [GO:0035690]; cellular response to glucose stimulus [GO:0071333]; cellular response to growth factor stimulus [GO:0071363]; cellular response to manganese ion [GO:0071287]; cellular response to nicotine [GO:0071316]; cerebral cortex development [GO:0021987]; circadian sleep/wake cycle [GO:0042745]; dopamine biosynthetic process [GO:0042416]; dopamine biosynthetic process from tyrosine [GO:0006585]; eating behavior [GO:0042755]; embryonic camera-type eye morphogenesis [GO:0048596]; epinephrine biosynthetic process [GO:0042418]; eye photoreceptor cell development [GO:0042462]; fatty acid metabolic process [GO:0006631]; glycoside metabolic process [GO:0016137]; heart development [GO:0007507]; heart morphogenesis [GO:0003007]; isoquinoline alkaloid metabolic process [GO:0033076]; learning [GO:0007612]; locomotory behavior [GO:0007626]; mating behavior [GO:0007617]; memory [GO:0007613]; multicellular organism aging [GO:0010259]; neurotransmitter biosynthetic process [GO:0042136]; norepinephrine biosynthetic process [GO:0042421]; phthalate metabolic process [GO:0018963]; phytoalexin metabolic process [GO:0052314]; pigmentation [GO:0043473]; regulation of heart contraction [GO:0008016]; response to activity [GO:0014823]; response to amphetamine [GO:001975]; response to corticosterone [GO:0051412]; response to electrical stimulus [GO:0051602]; response to estradiol [GO:0032355]; response to ethanol [GO:0045471]; response to ether [GO:0045472]; response to herbicide [GO:0009635]; response to hypoxia [GO:0001666]; response to immobilization stress [GO:0035902]; response to isolation stress [GO:0035900]; response to light stimulus [GO:0009416]; |
| 138 | A2RUC4 | TYW5_HUMAN | TYW5 C2orf60 | tRNA wYbutosine-synthesizing protein 5 (hTYW5) (EC 1.14.11.42) (tRNA(Phe) (7-(3-amino-3-carboxypropyl)wyosine(37)-C(2))-hydroxylase)                                       | H160-D162-H235    | 1 Fe cation | Catalytic | 1.14.11.42 | Unknown | No |                                                                                                                                                                                                                                                                                                                                                                                                                                                                                                                                                                                                                                                                                                                                                                                                                                                                                                                                                                                                                               | tRNA modification [GO:0006400]; wybutosine biosynthetic process [GO:0031591]                                                                                                                                                                                                                                                                                                                                                                                                                                                                                                                                                                                                                                                                                                                                                                                                                                                                                                                                                                                                                                                                                                                                                                                                                                                                                                                                                                                                                                                                                                                                                                                                                                                                                                                                                                                                                                                                                              |
| 139 | O14607 | UTY_HUMAN  | UTY KDM6C    | Histone demethylase UTY (EC 1.14.11.-) (Ubiquitously-transcribed TPR protein on the Y chromosome) (Ubiquitously-transcribed Y chromosome tetratricopeptide repeat protein) | H1093-E1095-H1173 | 1 Fe cation | Catalytic | 1.14.11.-  | Nucleus | No |                                                                                                                                                                                                                                                                                                                                                                                                                                                                                                                                                                                                                                                                                                                                                                                                                                                                                                                                                                                                                               | regulation of gene expression [GO:0010468]                                                                                                                                                                                                                                                                                                                                                                                                                                                                                                                                                                                                                                                                                                                                                                                                                                                                                                                                                                                                                                                                                                                                                                                                                                                                                                                                                                                                                                                                                                                                                                                                                                                                                                                                                                                                                                                                                                                                |
