# Supplementary material for: The human iron-proteome†
Source: Royal Society of Chemistry journal article supplement (doi:10.1039/c8mt00146d), 2018-08-10
Supplement: c8mt00146d8.pdf [file c8mt00146d8.pdf]

| Uniprot id | Entry name  | Gene names                                  | Protein names                                                                                                                                                                                         | Predicted Pattern                    | Number of cofactors                             | Iron-cofactor role       | EC number         | Subcellular location                    | Membrane associated | Involvement in disease                                                                                                                                                                                                                                                                                                                                                                                                                                                                                                                                                                                                                                                                                                                                                                                                                                                                                                                                                                                                                                                                                                   | Gene ontology (biological process)                                                                                                                                                                                                                                                                                                                        |
|------------|-------------|---------------------------------------------|-------------------------------------------------------------------------------------------------------------------------------------------------------------------------------------------------------|--------------------------------------|-------------------------------------------------|--------------------------|-------------------|-----------------------------------------|---------------------|--------------------------------------------------------------------------------------------------------------------------------------------------------------------------------------------------------------------------------------------------------------------------------------------------------------------------------------------------------------------------------------------------------------------------------------------------------------------------------------------------------------------------------------------------------------------------------------------------------------------------------------------------------------------------------------------------------------------------------------------------------------------------------------------------------------------------------------------------------------------------------------------------------------------------------------------------------------------------------------------------------------------------------------------------------------------------------------------------------------------------|-----------------------------------------------------------------------------------------------------------------------------------------------------------------------------------------------------------------------------------------------------------------------------------------------------------------------------------------------------------|
| 1 O75027   | ABCB7_HUMAN | ABCB7 ABC7                                  | ATP-binding cassette sub-family B member 7, mitochondrial (ATP-binding cassette transporter 7) (ABC transporter 7 protein)                                                                            | Unknown                              | Fe <sub>2</sub> S <sub>2</sub>                  | Substrate - transport    |                   | Mitochondrion                           | Yes                 | DISEASE: Anemia, sideroblastic, spinocerebellar ataxia (ASAT) [MIM:301310]: A X-linked recessive disorder characterized by an infantile to early childhood onset of non-progressive cerebellar ataxia and mild anemia, with hypochromia and microcytosis. (ECO:0000269) PubMed:10196363, ECO:0000269 PubMed:11050011, ECO:0000269 PubMed:11848325, ECO:0000269 PubMed:23398176. Note=The disease is caused by mutations affecting the gene represented in this entry.                                                                                                                                                                                                                                                                                                                                                                                                                                                                                                                                                                                                                                                    | cellular iron ion homeostasis [GO:0006879]; transmembrane transport [GO:0055085]; transport [GO:0006810]                                                                                                                                                                                                                                                  |
| 2 P61221   | ABCE1_HUMAN | ABCE1 RLI RNASEL1 RNASELI RNS41 OK/SW-cl.40 | ATP-binding cassette sub-family E member 1 (2'-5'-oligoadenylate-binding protein) (HuHP68) (RNase L inhibitor) (Ribonuclease 4 inhibitor) (RNS4)                                                      | C16-C21-C25-C29-C55-C58-C61-C65      | 2 x Fe <sub>2</sub> S <sub>4</sub>              | Unknown                  |                   | Cytoplasm, Mitochondrion, Cell membrane | Yes                 |                                                                                                                                                                                                                                                                                                                                                                                                                                                                                                                                                                                                                                                                                                                                                                                                                                                                                                                                                                                                                                                                                                                          | negative regulation of endoribonuclease activity [GO:0060702]; regulation of type I interferon-mediated signaling pathway [GO:0060338]; ribosomal subunit export from nucleus [GO:0000054]; translational initiation [GO:0006413]; translational termination [GO:0006415]; viral process [GO:0016032]                                                     |
| 3 P21399   | ACOC_HUMAN  | ACO1 IREB1                                  | Cytoplasmic aconitate hydratase (Aconitase) (EC 4.2.1.3) (Citrate hydro-lyase) (Ferritin repressor protein) (Iron regulatory protein 1) (IRP1) (Iron-responsive element-binding protein 1) (IRE-BP 1) | C437-C503-C506                       | Fe <sub>2</sub> S <sub>4</sub>                  | Substrate - sensor       | 4.2.1.3           | Cytoplasm                               | No                  |                                                                                                                                                                                                                                                                                                                                                                                                                                                                                                                                                                                                                                                                                                                                                                                                                                                                                                                                                                                                                                                                                                                          | cellular iron ion homeostasis [GO:0006879]; citrate metabolic process [GO:0006101]; intestinal absorption [GO:0005082]; post-embryonic development [GO:0009791]; regulation of translation [GO:0006417]; response to iron(II) ion [GO:0010040]; tricarboxylic acid cycle [GO:0006099]                                                                     |
| 4 Q99798   | ACON_HUMAN  | ACO2                                        | Aconitate hydratase, mitochondrial (Aconitase) (EC 4.2.1.3) (Citrate hydro-lyase)                                                                                                                     | C385-C448-C451                       | Fe <sub>2</sub> S <sub>4</sub>                  | Unknown                  | 4.2.1.3           | Mitochondrion                           | No                  | DISEASE: Infantile cerebellar-retinal degeneration (ICRD) [MIM:614559]: A severe autosomal recessive neurodegenerative disorder characterized by onset between ages 2 and 6 months of truncal hypotonia, ataxia, seizures, and ophthalmologic abnormalities, particularly optic atrophy and retinal degeneration. Affected individuals show profound psychomotor retardation, with only some achieving rolling, sitting, or recognition of family. Brain MRI shows progressive cerebral and cerebellar degeneration. (ECO:0000269) PubMed:22405087, ECO:0000269 PubMed:25351951. Note=The disease is caused by mutations affecting the gene represented in this entry.; DISEASE: Optic atrophy 9 (OP9) [MIM:616289]: A condition that features progressive visual loss in association with optic atrophy. Atrophy of the optic disk indicates a deficiency in the number of nerve fibers which arise in the retina and converge to form the optic disk, optic nerve, optic chiasm and optic tracts. (ECO:0000269) PubMed:25351951. Note=The disease is caused by mutations affecting the gene represented in this entry. | citrate metabolic process [GO:0006101]; generation of precursor metabolites and energy [GO:0006091]; succinate metabolic process [GO:0006102]; liver development [GO:0001889]; response to isolation stress [GO:0035000]; tricarboxylic acid cycle [GO:0006099]                                                                                           |
| 5 P10109   | ADX_HUMAN   | FDX1 ADX                                    | Adrenodoxin, mitochondrial (Adrenal ferredoxin) (Ferredoxin-1) (Hepatoredoxin)                                                                                                                        | C106-C112-C115-C152                  | Fe <sub>2</sub> S <sub>2</sub>                  | Electron transfer        |                   | Mitochondrion                           | No                  |                                                                                                                                                                                                                                                                                                                                                                                                                                                                                                                                                                                                                                                                                                                                                                                                                                                                                                                                                                                                                                                                                                                          | C21-steroid hormone biosynthetic process [GO:0006700]; cellular response to cAMP [GO:0071320]; cellular response to forskolin [GO:1904322]; cholesterol metabolic process [GO:0008203]; hormone biosynthetic process [GO:0042446]; small molecule metabolic process [GO:0044281]; steroid metabolic process [GO:0016125]                                  |
| 6 Q96NN9   | AIFM3_HUMAN | AIFM3 AIFL                                  | Apoptosis-inducing factor 3 (EC 1...-) (Apoptosis-inducing factor-like protein)                                                                                                                       | C109-H111-C128-H131                  | Fe <sub>2</sub> S <sub>2</sub> (predicted)      | Unknown                  | 1...-             | Mitochondrion, Nucleus                  | No                  |                                                                                                                                                                                                                                                                                                                                                                                                                                                                                                                                                                                                                                                                                                                                                                                                                                                                                                                                                                                                                                                                                                                          | execution phase of apoptosis [GO:0097194]                                                                                                                                                                                                                                                                                                                 |
| 7 Q06278   | AOXA_HUMAN  | AOX1 AO                                     | Aldehyde oxidase (EC 1.2.3.1) (Aldehyde oxidase 1) (Azaheterocycle hydroxylase) (EC 1.17.3.-)                                                                                                         | C44-C49-C52-C74; C114-C117-C149-C151 | 2 x Fe <sub>2</sub> S <sub>2</sub>              | Electron transfer        | 1.2.3.1; 1.17.3.- | Cytoplasm                               | No                  |                                                                                                                                                                                                                                                                                                                                                                                                                                                                                                                                                                                                                                                                                                                                                                                                                                                                                                                                                                                                                                                                                                                          | drug metabolic process [GO:0017144]; oxidation-reduction process [GO:0055114]; vitamin B6 metabolic process [GO:0042816]; xanthine catabolic process [GO:0009115]                                                                                                                                                                                         |
| 8 Q9Y3E2   | BOLA1_HUMAN | BOLA1 CGI-143                               | Bola-like protein 1 (hBoLA)                                                                                                                                                                           | Unknown                              | Fe <sub>2</sub> S <sub>2</sub> shared with GLRX | Substrate - biosynthesis |                   | Mitochondrion                           | No                  |                                                                                                                                                                                                                                                                                                                                                                                                                                                                                                                                                                                                                                                                                                                                                                                                                                                                                                                                                                                                                                                                                                                          |                                                                                                                                                                                                                                                                                                                                                           |
| 9 Q9H3K6   | BOLA2_HUMAN | BOLA2 BOLA2A My016; BOLA2B                  | Bola-like protein 2                                                                                                                                                                                   | Unknown                              | Fe <sub>2</sub> S <sub>2</sub> shared with GLRX | Substrate - biosynthesis |                   | Cytoplasm, Nucleus                      | No                  |                                                                                                                                                                                                                                                                                                                                                                                                                                                                                                                                                                                                                                                                                                                                                                                                                                                                                                                                                                                                                                                                                                                          | [2Fe-2S] cluster assembly [GO:0044571]; interleukin-12-mediated signaling pathway [GO:0035722]; protein maturation by iron-sulfur cluster transfer [GO:0097428]                                                                                                                                                                                           |
| 10 Q53533  | BOLA3_HUMAN | BOLA3                                       | Bola-like protein 3                                                                                                                                                                                   | Unknown                              | Fe <sub>2</sub> S <sub>2</sub> shared with GLRX | Substrate - biosynthesis |                   | Mitochondrion                           | No                  | DISEASE: Multiple mitochondrial dysfunctions syndrome 2 with hyperglycemia (MMDS2) [MIM:614299]: A severe disorder of systemic energy metabolism, resulting in weakness, respiratory failure, lack of neurologic development, lactic acidosis, hyperglycemia and early death. Some patients show failure to thrive, pulmonary hypertension, hypotonia and irritability. Biochemical features include severe combined deficiency of the 2-oxoacid dehydrogenases, defective lipico acid synthesis and reduction in activity of mitochondrial respiratory chain complexes. (ECO:0000269) PubMed:21944046, ECO:0000269 PubMed:25562699, ECO:0000269 PubMed:24334290, ECO:0000269 PubMed:26741492. Note=The disease is caused by mutations affecting the gene represented in this entry.                                                                                                                                                                                                                                                                                                                                     |                                                                                                                                                                                                                                                                                                                                                           |
| 11 Q5V42   | CDKAL_HUMAN | CDKAL1                                      | Threonylcarbamoyladenosine tRNA methyltransferase (EC 2.8.4.5) (CDKS regulatory subunit-associated protein 1-like 1) (tRNA-t(6)A37 methyltransferase)                                                 | C73-C109-C138; C214-C218-C221        | 2 x Fe <sub>2</sub> S <sub>4</sub>              | Catalytic                | 2.8.4.5           | Endoplasmic reticulum                   | Yes                 | DISEASE: Diabetes mellitus, non-insulin-dependent (NIDDM) [MIM:125853]: A multifactorial disorder of glucose homeostasis caused by a lack of sensitivity to the body's own insulin. Affected individuals usually have an obese body habitus and manifestations of a metabolic syndrome characterized by diabetes, insulin resistance, hypertension and hypertriglyceridemia. The disease results in long-term complications that affect the eyes, kidneys, nerves, and blood vessels. (ECO:0000269) PubMed:17460697, ECO:0000269 PubMed:17463246. Note=Disease susceptibility is associated with variations affecting the gene represented in this entry.                                                                                                                                                                                                                                                                                                                                                                                                                                                                | maintenance of translational fidelity [GO:1990145]; tRNA modification [GO:0006400]                                                                                                                                                                                                                                                                        |
| 12 Q9NZ45  | CISD1_HUMAN | CISD1 C10orf70 ZCD1                         | CDGSH iron-sulfur domain-containing protein 1 (MitoNEET)                                                                                                                                              | C72-C74-C83-H87                      | Fe <sub>2</sub> S <sub>2</sub>                  | Substrate - biogenesis   |                   | Mitochondrion                           | Yes                 |                                                                                                                                                                                                                                                                                                                                                                                                                                                                                                                                                                                                                                                                                                                                                                                                                                                                                                                                                                                                                                                                                                                          | regulation of cellular respiration [GO:0043457]                                                                                                                                                                                                                                                                                                           |
| 13 Q8N5K1  | CISD2_HUMAN | CISD2 CDGSH2 ERIS ZCD2                      | CDGSH iron-sulfur domain-containing protein 2 (Endoplasmic reticulum intermembrane small protein) (MitoNEET-related 1 protein) (Miner1) (Nutrient-deprivation autophagy factor-1) (NAF-1)             | C99-C101-C110-H114                   | Fe <sub>2</sub> S <sub>2</sub>                  | Unknown                  |                   | Endoplasmic reticulum, Mitochondrion    | Yes                 | DISEASE: Wolfram syndrome 2 (WFS2) [MIM:604928]: A rare disorder characterized by juvenile-onset insulin-dependent diabetes mellitus with optic atrophy. Other manifestations include diabetes insipidus, sensorineural deafness, dementia, psychiatric illnesses. WFS2 patients additionally show a strong bleeding tendency and gastrointestinal ulceration. Diabetes insipidus may be absent. (ECO:0000269) PubMed:17846994. Note=The disease is caused by mutations affecting the gene represented in this entry.                                                                                                                                                                                                                                                                                                                                                                                                                                                                                                                                                                                                    | autophagy of mitochondrion [GO:0000422]; multicellular organism aging [GO:0010259]; regulation of autophagy [GO:0010506]                                                                                                                                                                                                                                  |
| 14 POC7P0  | CISD3_HUMAN | CISD3                                       | CDGSH iron-sulfur domain-containing protein 3, mitochondrial (MitoNEET-related protein 2) (Miner2)                                                                                                    | C60-C62-C71-H75; C98-C100-C109-H113  | 2 x Fe <sub>2</sub> S <sub>2</sub>              | Unknown                  |                   | Mitochondrion                           | No                  |                                                                                                                                                                                                                                                                                                                                                                                                                                                                                                                                                                                                                                                                                                                                                                                                                                                                                                                                                                                                                                                                                                                          |                                                                                                                                                                                                                                                                                                                                                           |
| 15 Q96526  | CKSP1_HUMAN | CKSRAP1 C20orf34 CGI-05 HSPC167             | CDKS regulatory subunit-associated protein 1 (CDKS activator-binding protein C42)                                                                                                                     | C109-C145-C183; C258-C262-C265       | 2 x Fe <sub>2</sub> S <sub>4</sub>              | Catalytic                |                   | Unknown                                 | No                  |                                                                                                                                                                                                                                                                                                                                                                                                                                                                                                                                                                                                                                                                                                                                                                                                                                                                                                                                                                                                                                                                                                                          | brain development [GO:0007420]; mitochondrial tRNA modification [GO:0070900]; negative regulation of cyclin-dependent protein serine/threonine kinase activity [GO:0045736]; positive regulation of mitochondrial translation [GO:0070131]; positive regulation of translational fidelity [GO:0045903]; regulation of neuron differentiation [GO:0045664] |
| 16 Q9Y471  | CMAH_HUMAN  | CMAHP CMAH                                  | Inactive cytidine monophosphate-N-acetylneuraminic acid hydroxylase (CMP-N-acetylneuraminic acid hydroxylase-like protein) (Cytidine monophosphate-N-acetylneuraminic acid hydroxylase pseudogene)    | Unknown                              | Fe <sub>2</sub> S <sub>2</sub>                  | Unknown                  |                   | Cytoplasm, Nucleus                      | Yes                 |                                                                                                                                                                                                                                                                                                                                                                                                                                                                                                                                                                                                                                                                                                                                                                                                                                                                                                                                                                                                                                                                                                                          | regulation of Wnt signaling pathway [GO:0030111]                                                                                                                                                                                                                                                                                                          |
| 17 Q6F181  | CPIN1_HUMAN | CIAPIN1 CUA001 PRO0915                      | Anamorsin (Cytokine-induced apoptosis inhibitor 1) (Fe-S cluster assembly protein DRE2 homolog)                                                                                                       | C237-C246-C249-C251                  | 2 x Fe <sub>2</sub> S <sub>2</sub>              | Substrate - biogenesis   |                   | Cytoplasm, Mitochondrion, Nucleus       | Yes                 |                                                                                                                                                                                                                                                                                                                                                                                                                                                                                                                                                                                                                                                                                                                                                                                                                                                                                                                                                                                                                                                                                                                          | apoptotic process [GO:0006915]; hemopoiesis [GO:0030097]; iron-sulfur cluster assembly [GO:0016226]; negative regulation of apoptotic process [GO:0043066]                                                                                                                                                                                                |

|    |        |             |                         |                                                                                                                                                                                                                                                                           |                         |                                |                         |                   |                        |    |                                                                                                                                                                                                                                                                                                                                                                                                                                                                                                                                                                                                                                                                                                                                                                                                                                                                                                                                                                                                                                                                                                                                                                                                                                                                                                                                                                                                                                                                      |                                                                                                                                                                                                                                                                                                                                                                                                                                                                                                                                                                                                                                                                                                                                                                                                                                                                                                                                                                                                                                            |
|----|--------|-------------|-------------------------|---------------------------------------------------------------------------------------------------------------------------------------------------------------------------------------------------------------------------------------------------------------------------|-------------------------|--------------------------------|-------------------------|-------------------|------------------------|----|----------------------------------------------------------------------------------------------------------------------------------------------------------------------------------------------------------------------------------------------------------------------------------------------------------------------------------------------------------------------------------------------------------------------------------------------------------------------------------------------------------------------------------------------------------------------------------------------------------------------------------------------------------------------------------------------------------------------------------------------------------------------------------------------------------------------------------------------------------------------------------------------------------------------------------------------------------------------------------------------------------------------------------------------------------------------------------------------------------------------------------------------------------------------------------------------------------------------------------------------------------------------------------------------------------------------------------------------------------------------------------------------------------------------------------------------------------------------|--------------------------------------------------------------------------------------------------------------------------------------------------------------------------------------------------------------------------------------------------------------------------------------------------------------------------------------------------------------------------------------------------------------------------------------------------------------------------------------------------------------------------------------------------------------------------------------------------------------------------------------------------------------------------------------------------------------------------------------------------------------------------------------------------------------------------------------------------------------------------------------------------------------------------------------------------------------------------------------------------------------------------------------------|
| 18 | Q96FC9 | DDX11_HUMAN | DDX11 CHL1 CHLR1 KRG2   | ATP-dependent DNA helicase DDX11 (EC 3.6.4.12) (CHL1-related protein 1) (hCHLR1) (DEAD/H-box protein 11) (Keratinocyte growth factor-regulated gene 2 protein) (KRG-2)                                                                                                    | C267-C285-C315-C350     | Fe <sub>2</sub> S <sub>4</sub> | Structural - Regulatory | 3.6.4.12          | Cytoplasm, Nucleus     | No | DISEASE: Warsaw breakage syndrome (WBS) [MIM:613398]: A syndrome characterized by severe microcephaly, pre- and postnatal growth retardation, facial dysmorphism and abnormal skin pigmentation. Additional features include high arched palate, coloboma of the right optic disk, deafness, ventricular septal defect, toes and fingers abnormalities. At cellular level, drug-induced chromosomal breakage, a feature of Fanconi anemia, and sister chromatid cohesion defects, a feature of Roberts syndrome, coexist. [ECO:0000269]PubMed:20137776, ECO:0000269]PubMed:23033317, ECO:0000269]PubMed:26089203. Note=The disease is caused by mutations affecting the gene represented in this entry.                                                                                                                                                                                                                                                                                                                                                                                                                                                                                                                                                                                                                                                                                                                                                              | cellular response to bleomycin [GO:1904976]; cellular response to cisplatin [GO:0072719]; cellular response to DNA damage stimulus [GO:0006974]; cellular response to hydroxyurea [GO:0072711]; DNA duplex unwinding [GO:0032508]; DNA repair [GO:0006281]; G-quadruplex DNA unwinding [GO:0048065]; RFE1-mediated unfolded protein response [GO:0036498]; multicellular organism development [GO:0007275]; negative regulation of protein binding [GO:0032091]; nuclear chromatin organization [GO:1990700]; positive regulation of chromatin binding [GO:0035563]; positive regulation of double-strand break repair [GO:2000781]; positive regulation of endonuclease activity [GO:0032079]; positive regulation of sister chromatid cohesion [GO:0045876]; positive regulation of transcription of nuclear large rRNA transcript from RNA polymerase I promoter [GO:19018188]; replication fork processing [GO:0031297]; sister chromatid cohesion [GO:0007062]; transcription, DNA-templated [GO:0006351]; viral process [GO:0016032] |
| 19 | Q92771 | DDX12_HUMAN | DDX12P CHLR2 DDX12      | Putative ATP-dependent RNA helicase DDX12 (EC 3.6.4.13) (CHL1-related protein 2) (hCHLR2) (DEAD/H-box protein 12)                                                                                                                                                         | C286-C304-C334-C369     | Fe <sub>2</sub> S <sub>4</sub> | Structural - Regulatory | 3.6.4.13          | Nucleus                | No |                                                                                                                                                                                                                                                                                                                                                                                                                                                                                                                                                                                                                                                                                                                                                                                                                                                                                                                                                                                                                                                                                                                                                                                                                                                                                                                                                                                                                                                                      | cell cycle [GO:0007049]; nucleobase-containing compound metabolic process [GO:0006139]                                                                                                                                                                                                                                                                                                                                                                                                                                                                                                                                                                                                                                                                                                                                                                                                                                                                                                                                                     |
| 20 | P51530 | DNA2_HUMAN  | DNA2 DNA2L KIAA0083     | DNA replication ATP-dependent helicase/nuclease DNA2 (hDNA2) (DNA replication ATP-dependent helicase-like homolog) [Includes: DNA replication nuclease DNA2 (EC 3.1.-.-); DNA replication ATP-dependent helicase DNA2 (EC 3.6.4.12)]                                      | C136-C393-C396-C402     | Fe <sub>2</sub> S <sub>4</sub> | Structural - Regulatory | 3.1.-.-; 3.6.4.12 | Mitochondrion, Nucleus | No | DISEASE: Progressive external ophthalmoplegia with mitochondrial DNA deletions, autosomal dominant, 6 (PEO6) [MIM:615156]: A disorder characterized by muscle weakness, mainly affecting the lower limbs, external ophthalmoplegia, exercise intolerance, and mitochondrial DNA deletions on muscle biopsy. Symptoms may appear in childhood or adulthood and show slow progression. [ECO:0000269]PubMed:23352259. Note=The disease is caused by mutations affecting the gene represented in this entry.; DISEASE: Seckel syndrome 8 (SCKL8) [MIM:615807]: A rare autosomal recessive disorder characterized by proportionate dwarfism of prenatal onset associated with low birth weight, growth retardation, severe microcephaly with a bird-headed like appearance, and mental retardation. [ECO:0000269]PubMed:24389050. Note=The disease is caused by mutations affecting the gene represented in this entry.                                                                                                                                                                                                                                                                                                                                                                                                                                                                                                                                                   | base-excision repair [GO:0006284]; DNA double-strand break processing [GO:0000729]; DNA replication [GO:0006260]; DNA replication, Okazaki fragment processing [GO:0033567]; DNA replication, removal of RNA primer [GO:0043137]; DNA replication checkpoint [GO:0000076]; DNA synthesis involved in DNA repair [GO:0000731]; G-quadruplex DNA unwinding [GO:0044806]; mitochondrial DNA repair [GO:0043504]; mitochondrial DNA replication [GO:0006264]; mitotic telomere maintenance via semi-conservative replication [GO:1902990]; nucleic acid phosphodiester bond hydrolysis [GO:0090305]; positive regulation of DNA replication [GO:0045740]; regulation of signal transduction by p53 class mediator [GO:1901796]; strand displacement [GO:0000732]; t-circle formation [GO:0090656]; telomere maintenance [GO:0000723]; telomere maintenance via semi-conservative replication [GO:0032201]                                                                                                                                      |
| 21 | Q9BZG8 | DPH1_HUMAN  | DPH1 DPH2L DPH2L1 OVCA1 | 2-(3-amino-3-carboxypropyl)histidine synthase subunit 1 (EC 2.5.1.108) [Diphthamide biosynthesis protein 1] (Diphtheria toxin resistance protein 1) (Ovarian cancer-associated gene 1 protein) (S-adenosyl-L-methionine:L-histidine 3-amino-3-carboxypropyltransferase 1) | C115-C219-C347          | Fe <sub>2</sub> S <sub>4</sub> | Catalytic               | 2.5.1.108         | Cytoplasm, Nucleus     | No | DISEASE: Developmental delay with short stature, dysmorphic features, and sparse hair [DESSH] [MIM:616901]: An autosomal recessive syndrome characterized by intellectual disability, short stature, and craniofacial and ectodermal anomalies including scaphocephaly with or without craniosynostosis, prominent forehead, sparse eyebrows and hair, hypoplastic toenails and, in some cases, dental anomalies. [ECO:0000269]PubMed:25558065, ECO:0000269]PubMed:26220823. Note=The disease is caused by mutations affecting the gene represented in this entry.                                                                                                                                                                                                                                                                                                                                                                                                                                                                                                                                                                                                                                                                                                                                                                                                                                                                                                   | cell proliferation [GO:0008283]; peptidyl-diphthamide biosynthetic process from peptidyl-histidine [GO:0017183]                                                                                                                                                                                                                                                                                                                                                                                                                                                                                                                                                                                                                                                                                                                                                                                                                                                                                                                            |
| 22 | Q9BQC3 | DPH2_HUMAN  | DPH2 DPH2L2             | 2-(3-amino-3-carboxypropyl)histidine synthase subunit 2 (EC 2.5.1.108) [Diphthamide biosynthesis protein 2] (Diphtheria toxin resistance protein 2) (S-adenosyl-L-methionine:L-histidine 3-amino-3-carboxypropyltransferase 2)                                            | C88-C341                | Fe <sub>2</sub> S <sub>4</sub> | Catalytic               | 2.5.1.108         | Unknown                | No |                                                                                                                                                                                                                                                                                                                                                                                                                                                                                                                                                                                                                                                                                                                                                                                                                                                                                                                                                                                                                                                                                                                                                                                                                                                                                                                                                                                                                                                                      | peptidyl-diphthamide biosynthetic process from peptidyl-histidine [GO:0017183]                                                                                                                                                                                                                                                                                                                                                                                                                                                                                                                                                                                                                                                                                                                                                                                                                                                                                                                                                             |
| 23 | P28340 | DPOD1_HUMAN | POLD1 POLD              | DNA polymerase delta catalytic subunit (EC 2.7.7.7) (EC 3.1.11.-) (DNA polymerase subunit delta p125)                                                                                                                                                                     | C1058-C1061-C1071-C1076 | Fe <sub>2</sub> S <sub>4</sub> | Structural - Regulatory | 2.7.7.7; 3.1.11.- | Nucleus                | No | DISEASE: Colorectal cancer 10 (CRC10) [MIM:612591]: A complex disease characterized by malignant lesions arising from the inner wall of the large intestine (the colon) and the rectum. Genetic alterations are often associated with progression from premalignant lesion (adenoma) to invasive adenocarcinoma. Risk factors for cancer of the colon and rectum include colon polyps, long-standing ulcerative colitis, and genetic family history. [ECO:0000269]PubMed:23263490, ECO:0000269]PubMed:24501277. Note=Disease susceptibility is associated with variations affecting the gene represented in this entry.; DISEASE: Mandibular hypoplasia, deafness, progeroid features, and lipodystrophy syndrome (MDPL) [MIM:615381]: An autosomal dominant systemic disorder characterized by prominent loss of subcutaneous fat, metabolic abnormalities including insulin resistance and diabetes mellitus, sclerodermatous skin, and a facial appearance characterized by mandibular hypoplasia. Sensorineural deafness occurs late in the first or second decades of life. [ECO:0000269]PubMed:23770608. Note=The disease is caused by mutations affecting the gene represented in this entry.                                                                                                                                                                                                                                                                 | base-excision repair, gap-filling [GO:0006287]; cellular response to UV [GO:0034644]; DNA damage response, detection of DNA damage [GO:0042769]; DNA ligation [GO:0006260]; DNA repair [GO:0006281]; DNA replication [GO:0006260]; DNA replication proofreading [GO:0045004]; DNA synthesis involved in DNA repair [GO:0000731]; fatty acid homeostasis [GO:0055089]; mismatch repair [GO:0006298]; nucleotide-excision repair, DNA gap filling [GO:0006297]; nucleotide-excision repair, DNA incision [GO:0033683]; nucleotide-excision repair, DNA incision, 5'-to lesion [GO:0006296]; response to UV [GO:0009411]; telomere maintenance [GO:0000723]; telomere maintenance via semi-conservative replication [GO:0032201]; transcription-coupled nucleotide-excision repair [GO:0006283]; translesion synthesis [GO:0019985]                                                                                                                                                                                                           |
| 24 | Q07864 | DPOE1_HUMAN | POLE POLE1              | DNA polymerase epsilon catalytic subunit A (EC 2.7.7.7) (DNA polymerase II subunit A)                                                                                                                                                                                     | C2221-C2224-C2236-C2238 | Fe <sub>2</sub> S <sub>4</sub> | Structural - Regulatory | 2.7.7.7           | Nucleus                | No | DISEASE: Colorectal cancer 12 (CRC12) [MIM:615083]: A complex disease characterized by malignant lesions arising from the inner wall of the large intestine (the colon) and the rectum. Genetic alterations are often associated with progression from premalignant lesion (adenoma) to invasive adenocarcinoma. Risk factors for cancer of the colon and rectum include colon polyps, long-standing ulcerative colitis, and genetic family history. CRC12 is characterized by a high-penetrance predisposition to the development of colorectal adenomas and carcinomas, with a variable tendency to develop multiple and large tumors. Onset is usually before age 40 years. The histologic features of the tumors are unremarkable. [ECO:0000269]PubMed:23263490, ECO:0000269]PubMed:24501277, ECO:0000269]PubMed:25860647, ECO:0000269]PubMed:27573199. Note=Disease susceptibility is associated with variations affecting the gene represented in this entry.; DISEASE: Facial dysmorphism, immunodeficiency, livido, and short stature (FLS) [MIM:615139]: A syndrome characterized by mild facial dysmorphism, mainly malar hypoplasia, livido on the skin since birth, and immunodeficiency resulting in recurrent infections. Growth impairment is observed during early childhood and results in variable short stature in adulthood. [ECO:0000269]PubMed:23230001. Note=The disease is caused by mutations affecting the gene represented in this entry. | base-excision repair, gap-filling [GO:0006287]; DNA replication [GO:0006260]; DNA replication initiation [GO:0006270]; DNA replication proofreading [GO:0045004]; DNA synthesis involved in DNA repair [GO:0000731]; embryonic organ development [GO:0048568]; G1/S transition of mitotic cell cycle [GO:0000882]; leading strand elongation [GO:0006272]; nucleotide-excision repair, DNA gap filling [GO:0006297]; telomere maintenance via semi-conservative replication [GO:0032201]                                                                                                                                                                                                                                                                                                                                                                                                                                                                                                                                                   |

|    |        |             |                   |                                                                                                                                                                                                                                                                                                                                                                                  |                                                                                |                                    |                         |          |                    |     |                                                                                                                                                                                                                                                                                                                                                                                                                                                                                                                                                                                                                                                                                                                                                                                                                                                                                                                                                                                                                                                                                                                                                                                                                                                                                                                                                                                                                                                                                                                                                                                                                                                                                                                                                                                                                                                                                                                                                                                                                                                                                                                                                                                                                                                                                                                                                                                                                                                                              |                                                                                                                                                                                                                                                                                                                                                                                                                                                                                                                                                                                                                                                                                                                                                                                                                                                                                                                                                                                                                                                                                                                                                                                                                                                                                                                                                                                                                                                                                                                                                                                                                                                                                                                                                                                                                                                                                                                                                                                                                                                          |
|----|--------|-------------|-------------------|----------------------------------------------------------------------------------------------------------------------------------------------------------------------------------------------------------------------------------------------------------------------------------------------------------------------------------------------------------------------------------|--------------------------------------------------------------------------------|------------------------------------|-------------------------|----------|--------------------|-----|------------------------------------------------------------------------------------------------------------------------------------------------------------------------------------------------------------------------------------------------------------------------------------------------------------------------------------------------------------------------------------------------------------------------------------------------------------------------------------------------------------------------------------------------------------------------------------------------------------------------------------------------------------------------------------------------------------------------------------------------------------------------------------------------------------------------------------------------------------------------------------------------------------------------------------------------------------------------------------------------------------------------------------------------------------------------------------------------------------------------------------------------------------------------------------------------------------------------------------------------------------------------------------------------------------------------------------------------------------------------------------------------------------------------------------------------------------------------------------------------------------------------------------------------------------------------------------------------------------------------------------------------------------------------------------------------------------------------------------------------------------------------------------------------------------------------------------------------------------------------------------------------------------------------------------------------------------------------------------------------------------------------------------------------------------------------------------------------------------------------------------------------------------------------------------------------------------------------------------------------------------------------------------------------------------------------------------------------------------------------------------------------------------------------------------------------------------------------------|----------------------------------------------------------------------------------------------------------------------------------------------------------------------------------------------------------------------------------------------------------------------------------------------------------------------------------------------------------------------------------------------------------------------------------------------------------------------------------------------------------------------------------------------------------------------------------------------------------------------------------------------------------------------------------------------------------------------------------------------------------------------------------------------------------------------------------------------------------------------------------------------------------------------------------------------------------------------------------------------------------------------------------------------------------------------------------------------------------------------------------------------------------------------------------------------------------------------------------------------------------------------------------------------------------------------------------------------------------------------------------------------------------------------------------------------------------------------------------------------------------------------------------------------------------------------------------------------------------------------------------------------------------------------------------------------------------------------------------------------------------------------------------------------------------------------------------------------------------------------------------------------------------------------------------------------------------------------------------------------------------------------------------------------------------|
| 25 | P09884 | DPOLA_HUMAN | POLA1 POLA        | DNA polymerase alpha catalytic subunit (EC 2.7.7.7) (DNA polymerase alpha catalytic subunit p180)                                                                                                                                                                                                                                                                                | C1348-C1353-C1371-C1374                                                        | Fe <sub>2</sub> S <sub>4</sub>     | Structural - Regulatory | 2.7.7.7  | Cytoplasm, Nucleus | No  | DISEASE: Pigmentary disorder, reticulate, with systemic manifestations, X-linked (PDR) [MIM:301220]; A X-linked recessive disorder characterized by recurrent infections and sterile inflammation in various organs. Diffuse skin hyperpigmentation with a distinctive reticulate pattern is universally evident by early childhood. This is later followed in many patients by hypohidrosis, corneal inflammation and scarring, enterocolitis that resembles inflammatory bowel disease, and recurrent urethral strictures. Melanin and amyloid deposition is present in the dermis. Affected males also have a characteristic facies with frontally upswept hair and flared eyebrows. Female carriers have only restricted pigmentary changes along Blaschko's lines. (ECO:0000269) PubMed:27019227). Note-The disease is caused by mutations affecting the gene represented in this entry. XLPR is caused by a recurrent intronic mutation that results in missplicing and reduced POLA1 expression. This leads to a decrease in cytosolic RNA-DNA hybrids and constitutive activation of type I interferon responses, but has no effect on cell replication. (ECO:0000269) PubMed:27019227).                                                                                                                                                                                                                                                                                                                                                                                                                                                                                                                                                                                                                                                                                                                                                                                                                                                                                                                                                                                                                                                                                                                                                                                                                                                                             | cell proliferation [GO:0008283]; DNA replication [GO:0006260]; DNA replication, synthesis of RNA primer [GO:0006269]; DNA replication initiation [GO:0006270]; DNA strand elongation involved in DNA replication [GO:0006271]; double-strand break repair via nonhomologous end joining [GO:0006303]; G1/S transition of mitotic cell cycle [GO:0000923]; lagging strand elongation [GO:0006273]; leading strand elongation [GO:0006272]; regulation of transcription involved in G1/S transition of mitotic cell cycle [GO:0000083]; telomere maintenance via semi-conservative replication [GO:0032201]; viral process [GO:0016032]                                                                                                                                                                                                                                                                                                                                                                                                                                                                                                                                                                                                                                                                                                                                                                                                                                                                                                                                                                                                                                                                                                                                                                                                                                                                                                                                                                                                                    |
| 26 | Q12882 | DPYD_HUMAN  | DPYD              | Dihydropyrimidine dehydrogenase [NADP(+)] (DHPDHase) (DPD) (EC 1.3.1.2) (Dihydrothymine dehydrogenase) (Dihydrouracil dehydrogenase)                                                                                                                                                                                                                                             | C79-C82-C87-C91; C130-C136-C140-C156; C953-C956-C959-C963; C986-C989-C992-C996 | 4 x Fe <sub>2</sub> S <sub>4</sub> | Unknown                 | 1.3.1.2  | Cytoplasm          | No  | DISEASE: Dihydropyrimidine dehydrogenase deficiency (DPYDD) [MIM:274270]: A metabolic disorder with large phenotypic variability, ranging from no symptoms to a convulsive disorder with motor and mental retardation. It is characterized by persistent urinary excretion of excessive amounts of uracil, thymine and 5-hydroxymethyluracil. Patients suffering from this disease show a severe reaction to the anticancer drug 5-fluorouracil. (ECO:0000269) PubMed:14702039, ECO:0000269) PubMed:16710414, ECO:0000269) PubMed:9266349, ECO:0000269) PubMed:9439663). Note-The disease is caused by mutations affecting the gene represented in this entry.                                                                                                                                                                                                                                                                                                                                                                                                                                                                                                                                                                                                                                                                                                                                                                                                                                                                                                                                                                                                                                                                                                                                                                                                                                                                                                                                                                                                                                                                                                                                                                                                                                                                                                                                                                                                               | beta-alanine biosynthetic process [GO:0019483]; purine nucleobase catabolic process [GO:0006145]; pyrimidine nucleobase catabolic process [GO:0006208]; pyrimidine nucleoside catabolic process [GO:0046135]; thymidine catabolic process [GO:0006214]; thymine catabolic process [GO:0006210]; uracil catabolic process [GO:0006212]                                                                                                                                                                                                                                                                                                                                                                                                                                                                                                                                                                                                                                                                                                                                                                                                                                                                                                                                                                                                                                                                                                                                                                                                                                                                                                                                                                                                                                                                                                                                                                                                                                                                                                                    |
| 27 | Q9H9T3 | ELP3_HUMAN  | ELP3              | Elongator complex protein 3 (hELP3) (EC 2.3.1.48)                                                                                                                                                                                                                                                                                                                                | C99-C109-C112                                                                  | Fe <sub>2</sub> S <sub>4</sub>     | Catalytic               | 2.3.1.48 | Cytoplasm          | No  | DISEASE: Note-ELP3 genetic variations may be associated with an increased risk for neurodegeneration and motor neuron diseases. (ECO:0000303) PubMed:18996918).                                                                                                                                                                                                                                                                                                                                                                                                                                                                                                                                                                                                                                                                                                                                                                                                                                                                                                                                                                                                                                                                                                                                                                                                                                                                                                                                                                                                                                                                                                                                                                                                                                                                                                                                                                                                                                                                                                                                                                                                                                                                                                                                                                                                                                                                                                              | central nervous system development [GO:0007417]; histone H3 acetylation [GO:0043966]; histone H4 acetylation [GO:0043967]; neuron migration [GO:0001764]; positive regulation of cell migration [GO:0030335]; regulation of transcription from RNA polymerase II promoter [GO:0006357]; regulation of transcription from RNA polymerase II promoter [GO:0006368]                                                                                                                                                                                                                                                                                                                                                                                                                                                                                                                                                                                                                                                                                                                                                                                                                                                                                                                                                                                                                                                                                                                                                                                                                                                                                                                                                                                                                                                                                                                                                                                                                                                                                         |
| 28 | P18074 | ERCC2_HUMAN | ERCC2 XPD XPDC    | TFIIH basal transcription factor complex helicase XPD subunit (EC 3.6.4.12) (Basic transcription factor 2 80 kDa subunit) (BTf2 p80) (XPD) (DNA excision repair protein ERCC-2) (DNA repair protein complementing XP-D cells) (TFIIH basal transcription factor complex 80 kDa subunit) (TFIIH 80 kDa subunit) (TFIIH p80) (Xeroderma pigmentosum group D-complementing protein) | C116-C134-C155-C190                                                            | Fe <sub>2</sub> S <sub>4</sub>     | Structural - Regulatory | 3.6.4.12 | Cytoplasm, Nucleus | No  | DISEASE: Xeroderma pigmentosum complementation group D (XP-D) [MIM:278730]: An autosomal recessive pigmentary skin disorder characterized by solar hypersensitivity of the skin, high predisposition for developing cancers on areas exposed to sunlight and, in some cases, neurological abnormalities. The skin develops marked freckling and other pigmentation abnormalities. Some XP-D patients present features of Cockayne syndrome, including cachectic dwarfism, pigmentary retinopathy, ataxia, decreased nerve conduction velocities. The phenotype combining xeroderma pigmentosum and Cockayne syndrome traits is referred to as XP-CS complex. (ECO:0000269) PubMed:10447254, ECO:0000269) PubMed:11709541, ECO:0000269) PubMed:15494306, ECO:0000269) PubMed:7585650, ECO:0000269) PubMed:7825573, ECO:0000269) PubMed:7849702, ECO:0000269) PubMed:9101292). Note-The disease is caused by mutations affecting the gene represented in this entry.; DISEASE: Trichothiodystrophy 1, photosensitive (TTD1) [MIM:601275]: A form of trichothiodystrophy, an autosomal recessive disease characterized by sulfur-deficient brittle hair and multisystem variable abnormalities. The spectrum of clinical features varies from mild disease with only hair involvement to severe disease with cutaneous, neurologic and profound developmental defects. Ichthyosis, intellectual and developmental disabilities, decreased fertility, abnormal characteristics at birth, ocular abnormalities, short stature, and infections are common manifestations. There are both photosensitive and non-photosensitive forms of the disorder. TTD1 patients manifest cutaneous photosensitivity. (ECO:0000269) PubMed:11242112, ECO:0000269) PubMed:7920640, ECO:0000269) PubMed:8571952, ECO:0000269) PubMed:9195225, ECO:0000269) PubMed:9238033, ECO:0000269) PubMed:9758621). Note-The disease is caused by mutations affecting the gene represented in this entry.; DISEASE: Cerebro-oculo-facio-skeletal syndrome 2 (COFS2) [MIM:610756]: A disorder of prenatal onset characterized by microcephaly, congenital cataracts, facial dysmorphism, neurogenic degeneration, and osteopenia. (ECO:0000269) PubMed:12359134, ECO:0000269) PubMed:12815589, ECO:0000269) PubMed:16527485, ECO:0000269) PubMed:17412732, ECO:0000269) PubMed:19249206, ECO:0000269) PubMed:20370797). Note-The disease is caused by mutations affecting the gene represented in this entry. | 7-methylguanosine mRNA capping [GO:0006370]; splicing [GO:0007568]; apoptotic process [GO:0006015]; bone mineralization [GO:0030282]; cell proliferation [GO:0008283]; central nervous system myelin formation [GO:0032289]; chromosome segregation [GO:0007059]; embryonic cleavage [GO:0040016]; embryonic organ development [GO:0048568]; erythrocyte maturation [GO:0043249]; extracellular matrix organization [GO:0030198]; global genome nucleotide excision repair [GO:0070111]; hair cell differentiation [GO:0035315]; hair follicle maturation [GO:0048820]; hematopoietic stem cell differentiation [GO:0060218]; in utero embryonic development [GO:0001701]; multicellular organism growth [GO:0035264]; nucleotide-excision repair [GO:0006289]; nucleotide-excision repair, DNA duplex unwinding [GO:0000717]; nucleotide-excision repair, DNA incision [GO:0033683]; nucleotide-excision repair, DNA incision, 3'-to lesion [GO:0006295]; nucleotide-excision repair, DNA incision, 5'-to lesion [GO:0006296]; nucleotide-excision repair, preincision complex assembly [GO:0006294]; nucleotide-excision repair, preincision complex stabilization [GO:0006293]; positive regulation of DNA binding [GO:0043388]; positive regulation of transcription, DNA-templated [GO:0045893]; positive regulation of transcription from RNA polymerase II promoter [GO:0045944]; post-embryonic development [GO:0009393]; protein phosphorylation [GO:0006468]; regulation of mitotic cell cycle phase transition [GO:1901990]; response to hypoxia [GO:0001666]; response to oxidative stress [GO:0006979]; spinal cord development [GO:0021510]; termination of RNA polymerase I transcription [GO:0006363]; transcription-coupled nucleotide-excision repair [GO:0006283]; transcription elongation from RNA polymerase II promoter [GO:0006368]; transcription elongation from RNA polymerase I promoter [GO:0006362]; transcription from RNA polymerase II promoter [GO:0006366]; transcription from RNA polymerase I promoter [GO:0006367] |
| 29 | Q16134 | ETFD_HUMAN  | ETFDH             | Electron transfer flavoprotein-ubiquinone oxidoreductase, mitochondrial (ETF-QO) (ETF-ubiquinone oxidoreductase) (EC 1.5.5.1) (Electron-transferring-flavoprotein dehydrogenase) (ETF dehydrogenase)                                                                                                                                                                             | C561-C586-C589-C592                                                            | Fe <sub>2</sub> S <sub>4</sub>     | Electron transfer       | 1.5.5.1  | Mitochondrion      | Yes | DISEASE: Glutaric aciduria 2C (GA2C) [MIM:231680]: An autosomal recessively inherited disorder of fatty acid, amino acid, and choline metabolism. It is characterized by multiple acyl-CoA dehydrogenase deficiencies resulting in large excretion not only of glutaric acid, but also of lactic, ethylmalonic, butyric, isobutyric, 2-methyl-butyric, and isovaleric acids. [ECO:0000269) PubMed:12359134, ECO:0000269) PubMed:12815589, ECO:0000269) PubMed:16527485, ECO:0000269) PubMed:17412732, ECO:0000269) PubMed:19249206, ECO:0000269) PubMed:20370797). Note-The disease is caused by mutations affecting the gene represented in this entry.                                                                                                                                                                                                                                                                                                                                                                                                                                                                                                                                                                                                                                                                                                                                                                                                                                                                                                                                                                                                                                                                                                                                                                                                                                                                                                                                                                                                                                                                                                                                                                                                                                                                                                                                                                                                                     | electron transport chain [GO:0022900]; fatty acid beta-oxidation using acyl-CoA dehydrogenase [GO:0033539]; respiratory electron transport chain [GO:0022904]; response to oxidative stress [GO:0006979]                                                                                                                                                                                                                                                                                                                                                                                                                                                                                                                                                                                                                                                                                                                                                                                                                                                                                                                                                                                                                                                                                                                                                                                                                                                                                                                                                                                                                                                                                                                                                                                                                                                                                                                                                                                                                                                 |
| 30 | Q9BX63 | FANCI_HUMAN | BRIP1 BACH1 FANCI | Fanconi anemia group I protein (Protein FANCI) (EC 3.6.4.13) (ATP-dependent RNA helicase BRIP1) (BRCA1-associated C-terminal helicase 1) (BRCA1-interacting protein C-terminal helicase 1) (BRCA1-interacting protein 1)                                                                                                                                                         | C283-C298-C310-C350                                                            | Fe <sub>2</sub> S <sub>4</sub>     | Structural - Regulatory | 3.6.4.13 | Nucleus            | No  | DISEASE: Breast cancer (BC) [MIM:114480]: A common malignancy originating from breast epithelial tissue. Breast neoplasms can be distinguished by their histologic pattern. Invasive ductal carcinoma is by far the most common type. Breast cancer is etiologically and genetically heterogeneous. Important genetic factors have been indicated by familial occurrence and bilateral involvement. Mutations at more than one locus can be involved in different families or even in the same case. (ECO:0000269) PubMed:11301010, ECO:0000269) PubMed:14983014). Note-Disease susceptibility is associated with variations affecting the gene represented in this entry.; DISEASE: Fanconi anemia complementation group I (FANCI) [MIM:609054]: A disorder affecting all bone marrow elements and resulting in anemia, leukopenia and thrombopenia. It is associated with cardiac, renal and limb malformations, dermal pigmentary changes, and a predisposition to the development of malignancies. At the cellular level it is associated with hypersensitivity to DNA-damaging agents, chromosomal instability (increased chromosome breakage) and defective DNA repair. (ECO:0000269) PubMed:16116423, ECO:0000269) PubMed:16116424, ECO:0000269) PubMed:20639400). Note-The disease is caused by mutations affecting the gene represented in this entry.                                                                                                                                                                                                                                                                                                                                                                                                                                                                                                                                                                                                                                                                                                                                                                                                                                                                                                                                                                                                                                                                                                              | cellular response to angiotensin [GO:1904385]; cellular response to hypoxia [GO:0071456]; cellular response to vitamin [GO:0071295]; chiasma assembly [GO:0051026]; DNA damage checkpoint [GO:0000077]; DNA replication [GO:0006260]; DNA synthesis involved in DNA repair [GO:0000731]; double-strand break repair [GO:0006302]; double-strand break repair involved in meiotic recombination [GO:1909191]; meiotic DNA double-strand break processing involved in reciprocal meiotic recombination [GO:0010705]; negative regulation of cell proliferation [GO:0008285]; negative regulation of gene expression [GO:0010629]; regulation of signal transduction by p53 class mediator [GO:1901796]; regulation of transcription from RNA polymerase II promoter [GO:0006357]; response to toxic substance [GO:0009636]; seminiferous tubule development [GO:0072520]; spermatid development [GO:0007286]; spermatogonial cell division [GO:0007284]; strand displacement [GO:0000732]                                                                                                                                                                                                                                                                                                                                                                                                                                                                                                                                                                                                                                                                                                                                                                                                                                                                                                                                                                                                                                                                  |
| 31 | Q6P4F2 | FDX2_HUMAN  | FDX2 FDX1L        | Ferredoxin-2, mitochondrial (Adrenodoxin-like protein) (Ferredoxin-1-like protein)                                                                                                                                                                                                                                                                                               | C105-C111-C114-C151                                                            | Fe <sub>2</sub> S <sub>2</sub>     | Substrate - biogenesis  |          | Mitochondrion      | No  | C21-steroid hormone biosynthetic process [GO:0005700]; small molecule metabolic process [GO:0044281]; steroid metabolic process [GO:0016125]                                                                                                                                                                                                                                                                                                                                                                                                                                                                                                                                                                                                                                                                                                                                                                                                                                                                                                                                                                                                                                                                                                                                                                                                                                                                                                                                                                                                                                                                                                                                                                                                                                                                                                                                                                                                                                                                                                                                                                                                                                                                                                                                                                                                                                                                                                                                 |                                                                                                                                                                                                                                                                                                                                                                                                                                                                                                                                                                                                                                                                                                                                                                                                                                                                                                                                                                                                                                                                                                                                                                                                                                                                                                                                                                                                                                                                                                                                                                                                                                                                                                                                                                                                                                                                                                                                                                                                                                                          |

|    |        |             |                            |                                                                                                                                                                                                                                          |                     |                                                                |                          |                    |                          |     |                                                                                                                                                                                                                                                                                                                                                                                                                                                                                                                                                                                                                                                                                                                                                                                                                                                                                                                                                                                                                                                                                                                                                                                                                                                                                                                                                                                                                                                                                                                                                      |                                                                                                                                                                                                                                                                                                                                                                                                                                                                                                                                                                                                                                                                                                                                                                                                                                                                                                                                                                                                                                                                                                                                                                                                                                          |
|----|--------|-------------|----------------------------|------------------------------------------------------------------------------------------------------------------------------------------------------------------------------------------------------------------------------------------|---------------------|----------------------------------------------------------------|--------------------------|--------------------|--------------------------|-----|------------------------------------------------------------------------------------------------------------------------------------------------------------------------------------------------------------------------------------------------------------------------------------------------------------------------------------------------------------------------------------------------------------------------------------------------------------------------------------------------------------------------------------------------------------------------------------------------------------------------------------------------------------------------------------------------------------------------------------------------------------------------------------------------------------------------------------------------------------------------------------------------------------------------------------------------------------------------------------------------------------------------------------------------------------------------------------------------------------------------------------------------------------------------------------------------------------------------------------------------------------------------------------------------------------------------------------------------------------------------------------------------------------------------------------------------------------------------------------------------------------------------------------------------------|------------------------------------------------------------------------------------------------------------------------------------------------------------------------------------------------------------------------------------------------------------------------------------------------------------------------------------------------------------------------------------------------------------------------------------------------------------------------------------------------------------------------------------------------------------------------------------------------------------------------------------------------------------------------------------------------------------------------------------------------------------------------------------------------------------------------------------------------------------------------------------------------------------------------------------------------------------------------------------------------------------------------------------------------------------------------------------------------------------------------------------------------------------------------------------------------------------------------------------------|
| 32 | P80404 | GABT_HUMAN  | ABAT GABAT                 | 4-aminobutyrate aminotransferase, mitochondrial (EC 2.6.1.19) ((5)-3-amino-2-methylpropionate transaminase) (EC 2.6.1.22) (GABA aminotransferase) (GABA-AT) (gamma-amino-N-butyrate transaminase) (GABA transaminase) (GABA-T) (L-AIBAT) | C163-C166           | Fe <sub>2</sub> S <sub>2</sub> per homodimer                   | Unknown                  | 2.6.1.19; 2.6.1.22 | Mitochondrion            | No  | DISEASE: GABA transaminase deficiency (GABATD) [MIM:613163]: An enzymatic deficiency resulting in psychomotor retardation, hypotonia, hyperreflexia, lethargy, refractory seizures, and EEG abnormalities. [ECO:0000269] PubMed:10407778. Note-The disease is caused by mutations affecting the gene represented in this entry.                                                                                                                                                                                                                                                                                                                                                                                                                                                                                                                                                                                                                                                                                                                                                                                                                                                                                                                                                                                                                                                                                                                                                                                                                      | aging [GO:0007568]; behavioral response to cocaine [GO:0048148]; cerebellum development [GO:0021549]; copulation [GO:0007620]; exploration behavior [GO:0035640]; gamma-aminobutyric acid biosynthetic process [GO:0009449]; gamma-aminobutyric acid catabolic process [GO:0009450]; locomotory behavior [GO:0007626]; negative regulation of blood pressure [GO:0045776]; negative regulation of dopamine secretion [GO:0033602]; negative regulation of gamma-aminobutyric acid secretion [GO:0014053]; negative regulation of platelet aggregation [GO:0090331]; neurotransmitter catabolic process [GO:0042135]; positive regulation of aspartate secretion [GO:1904450]; positive regulation of dopamine metabolic process [GO:0045964]; positive regulation of heat generation [GO:0031652]; positive regulation of inhibitory postsynaptic potential [GO:0091511]; positive regulation of insulin secretion [GO:0032024]; positive regulation of prolactin secretion [GO:1902722]; positive regulation of uterine smooth muscle contraction [GO:0070474]; response to drug [GO:0042493]; response to ethanol [GO:0045471]; response to hypoxia [GO:0001666]; response to iron ion [GO:0010039]; response to nicotine [GO:0035094] |
| 33 | Q9NS18 | GLRX2_HUMAN | GLRX2 GRX2 CGI-133         | Glutaredoxin-2, mitochondrial                                                                                                                                                                                                            | C77                 | Fe <sub>2</sub> S <sub>2</sub> per homodimer                   | Substrate - biosynthesis |                    | Mitochondrion            | No  |                                                                                                                                                                                                                                                                                                                                                                                                                                                                                                                                                                                                                                                                                                                                                                                                                                                                                                                                                                                                                                                                                                                                                                                                                                                                                                                                                                                                                                                                                                                                                      | aging [GO:0007568]; apoptotic process [GO:0006915]; cell differentiation [GO:0030154]; cell redox homeostasis [GO:0045454]; cellular response to superoxide [GO:0071451]; DNA protection [GO:0042262]; glutathione metabolic process [GO:0006749]; regulation of signal transduction [GO:0009966]; regulation of transcription, DNA-templated [GO:0006355]; response to hydrogen peroxide [GO:0002542]; response to organic substance [GO:0010033]; response to redox state [GO:0051775]; response to temperature stimulus [GO:0009266]                                                                                                                                                                                                                                                                                                                                                                                                                                                                                                                                                                                                                                                                                                  |
| 34 | O76003 | GLRX3_HUMAN | GLRX3 PICOT TXNL2 HUSSY-22 | Glutaredoxin-3 (PKC-interacting cousin of thioredoxin) (PICOT) (PKC-theta-interacting protein) (PKCq-interacting protein) (Thioredoxin-like protein 2)                                                                                   | C159-C261           | Fe <sub>2</sub> S <sub>2</sub> shared with partner             | Substrate - biosynthesis |                    | Cytoplasm, Cell membrane | Yes |                                                                                                                                                                                                                                                                                                                                                                                                                                                                                                                                                                                                                                                                                                                                                                                                                                                                                                                                                                                                                                                                                                                                                                                                                                                                                                                                                                                                                                                                                                                                                      | [ZFe-25] cluster assembly [GO:0044571]; cell redox homeostasis [GO:0045454]; negative regulation of cardiac muscle hypertrophy [GO:0010614]; protein maturation by iron-sulfur cluster transfer [GO:0097428]; regulation of the force of heart contraction [GO:0002026]                                                                                                                                                                                                                                                                                                                                                                                                                                                                                                                                                                                                                                                                                                                                                                                                                                                                                                                                                                  |
| 35 | Q86SX6 | GLRX5_HUMAN | GLRX5 C14orf87             | Glutaredoxin-related protein 5, mitochondrial (Monothiol glutaredoxin-5)                                                                                                                                                                 | C67                 | Fe <sub>2</sub> S <sub>2</sub>                                 | Substrate - biogenesis   |                    | Mitochondrion            | No  | DISEASE: Anemia, sideroblastic, 3, pyridoxine-refractory (SIDBA3) [MIM:616860]: A form of sideroblastic anemia, a bone marrow disorder defined by the presence of pathologic iron deposits in erythroblast mitochondria. Sideroblastic anemia is characterized by anemia of varying severity, hypochromic peripheral erythrocytes, systemic iron overload secondary to chronic ineffective erythropoiesis, and the presence of bone marrow ringed sideroblasts. Sideroblasts are characterized by iron-loaded mitochondria clustered around the nucleus. SIDBA3 is refractory to treatment with vitamin B6, while iron chelation therapy may result in clinical improvement. SIDBA3 inheritance is autosomal recessive. [ECO:0000269] PubMed:17485548, ECO:0000269 PubMed:20364084, ECO:0000269 PubMed:25342667, ECO:0000269 PubMed:26100117. Note-The disease is caused by mutations affecting the gene represented in this entry.; DISEASE: Spasticity, childhood-onset, with hyperglycemia (SPAHGC) [MIM:616855]: An autosomal recessive disorder characterized by childhood-onset of spasticity, spinal lesions, leukodystrophy, optic atrophy in some patients, non-ketotic hyperglycemia, and defective enzymatic glycine cleavage. Glycine levels in the cerebrospinal fluid are mildly increased in some but not all patients. The increase is less pronounced than in patients with classic non-ketotic hyperglycemia. [ECO:0000269] PubMed:24334290. Note-The disease is caused by mutations affecting the gene represented in this entry. | cell redox homeostasis [GO:0045454]; hemopoiesis [GO:0030097]; protein lipoylation [GO:0009249]; small molecule metabolic process [GO:0044281]                                                                                                                                                                                                                                                                                                                                                                                                                                                                                                                                                                                                                                                                                                                                                                                                                                                                                                                                                                                                                                                                                           |
| 36 | A8MXD5 | GRCR1_HUMAN | GRCR1 DFNB25               | Glutaredoxin domain-containing cysteine-rich protein 1                                                                                                                                                                                   | C156                | Fe <sub>2</sub> S <sub>2</sub> (predicted)                     | Unknown                  |                    | Unknown                  | No  | DISEASE: Deafness, autosomal recessive, 25 (DFNB25) [MIM:613285]: A form of non-syndromic sensorineural deafness characterized by moderate to severe or profound hearing loss which is progressive in some individuals but not in others. Speech development is impaired in some but not all affected individuals, and vestibular dysfunction is observed in some affected individuals. Sensorineural deafness results from damage to the neural receptors of the inner ear, the nerve pathways to the brain, or the area of the brain that receives sound information. [ECO:0000269] PubMed:20137774, ECO:0000269 PubMed:20137778. Note-The disease is caused by mutations affecting the gene represented in this entry.                                                                                                                                                                                                                                                                                                                                                                                                                                                                                                                                                                                                                                                                                                                                                                                                                            | cell redox homeostasis [GO:0045454]; inner ear receptor cell development [GO:0060119]; inner ear receptor stereocilium organization [GO:0060122]; negative regulation of phosphatase activity [GO:0010923]; sensory perception of sound [GO:0007605]; vestibular receptor cell development [GO:0060118]                                                                                                                                                                                                                                                                                                                                                                                                                                                                                                                                                                                                                                                                                                                                                                                                                                                                                                                                  |
| 37 | P22830 | HEMH_HUMAN  | FECH                       | Ferrochelatase, mitochondrial (EC 4.99.1.1) (Heme synthase) (Protoheme ferrolyase)                                                                                                                                                       | C196-C403-C406-C411 | Fe <sub>2</sub> S <sub>2</sub>                                 | Regulatory               | 4.99.1.1           | Mitochondrion            | Yes | DISEASE: Erythropoietic protoporphyria (EPP) [MIM:177000]: A form of porphyria. Porphyrias are inherited defects in the biosynthesis of heme, resulting in the accumulation and increased excretion of porphyrins or porphyrin precursors. They are classified as erythropoietic or hepatic, depending on whether the enzyme deficiency occurs in red blood cells or in the liver. Erythropoietic protoporphyria is marked by excessive protoporphyrin in erythrocytes, plasma, liver and feces, and by widely varying photosensitive skin changes ranging from a burning or pruritic sensation to erythema, edema and wheals. [ECO:0000269] PubMed:10942404, ECO:0000269 PubMed:11375302, ECO:0000269 PubMed:12063482, ECO:0000269 PubMed:12601550, ECO:0000269 PubMed:1376018, ECO:0000269 PubMed:15286165, ECO:0000269 PubMed:17196882, ECO:0000269 PubMed:1755842, ECO:0000269 PubMed:7910885, ECO:0000269 PubMed:8757534, ECO:0000269 PubMed:9211198, ECO:0000269 PubMed:9585598, ECO:0000269 PubMed:9740232. Note-The disease is caused by mutations affecting the gene represented in this entry.                                                                                                                                                                                                                                                                                                                                                                                                                                             | cellular response to dexamethasone stimulus [GO:0071549]; generation of precursor metabolites and energy [GO:0006091]; heme biosynthetic process [GO:0006783]; protoporphyrinogen IX metabolic process [GO:0046501]; response to arsenic-containing substance [GO:0046685]; response to drug [GO:0042493]; response to ethanol [GO:0045471]; response to insecticide [GO:0017085]; response to lead ion [GO:0010288]; response to light stimulus [GO:0009416]; response to methylmercury [GO:0051597]; response to platinum ion [GO:0070541]                                                                                                                                                                                                                                                                                                                                                                                                                                                                                                                                                                                                                                                                                             |
| 38 | P48200 | IREB2_HUMAN | IREB2                      | Iron-responsive element-binding protein 2 (IRE-BP 2) (Iron regulatory protein 2) (IRP2)                                                                                                                                                  | C512-C578-C581      | Fe <sub>2</sub> S <sub>4</sub>                                 | Substrate - sensor       |                    | Cytoplasm                | No  |                                                                                                                                                                                                                                                                                                                                                                                                                                                                                                                                                                                                                                                                                                                                                                                                                                                                                                                                                                                                                                                                                                                                                                                                                                                                                                                                                                                                                                                                                                                                                      | cellular iron ion homeostasis [GO:0006879]; iron ion transport [GO:0006826]; metabolic process [GO:0008152]                                                                                                                                                                                                                                                                                                                                                                                                                                                                                                                                                                                                                                                                                                                                                                                                                                                                                                                                                                                                                                                                                                                              |
| 39 | Q9BU66 | ISCA1_HUMAN | ISCA1 HBLD2 GK004          | Iron-sulfur cluster assembly 1 homolog, mitochondrial (HESB-like domain-containing protein 2) (Iron-sulfur assembly protein Isca) (IscaA)                                                                                                | C57-C121-C123       | Fe <sub>2</sub> S <sub>2</sub> /Fe <sub>2</sub> S <sub>4</sub> | Substrate - biogenesis   |                    | Mitochondrion            | No  | DISEASE: Multiple mitochondrial dysfunctions syndrome 5 (MMDS5) [MIM:617613]: An autosomal recessive, severe disorder characterized by early onset neurological deterioration, seizures, cerebral and cerebellar leukodystrophy, dysmyelination, cortical migrational abnormalities, lactic acidosis and early demise. [ECO:0000269] PubMed:28356563. Note-The disease is caused by mutations affecting the gene represented in this entry.                                                                                                                                                                                                                                                                                                                                                                                                                                                                                                                                                                                                                                                                                                                                                                                                                                                                                                                                                                                                                                                                                                          | iron-sulfur cluster assembly [GO:0016226]; protein maturation by iron-sulfur cluster transfer [GO:0097428]; small molecule metabolic process [GO:0044281]                                                                                                                                                                                                                                                                                                                                                                                                                                                                                                                                                                                                                                                                                                                                                                                                                                                                                                                                                                                                                                                                                |

|    |        |             |                   |                                                                                                                                                                                                                                                                                                                                        |                                                           |                                                                     |                              |                     |                        |     |                                                                                                                                                                                                                                                                                                                                                                                                                                                                                                                                                                                                                                                                                                                                                                                                                                                                                                                                                                                                                                                                                                                                                                                                                                                                                                                                                                                                                                                                                                                                                                                                                                                                                                                                                                                                                                                                                                                                                      |                                                                                                                                                                                                                                                                                                                                                                              |
|----|--------|-------------|-------------------|----------------------------------------------------------------------------------------------------------------------------------------------------------------------------------------------------------------------------------------------------------------------------------------------------------------------------------------|-----------------------------------------------------------|---------------------------------------------------------------------|------------------------------|---------------------|------------------------|-----|------------------------------------------------------------------------------------------------------------------------------------------------------------------------------------------------------------------------------------------------------------------------------------------------------------------------------------------------------------------------------------------------------------------------------------------------------------------------------------------------------------------------------------------------------------------------------------------------------------------------------------------------------------------------------------------------------------------------------------------------------------------------------------------------------------------------------------------------------------------------------------------------------------------------------------------------------------------------------------------------------------------------------------------------------------------------------------------------------------------------------------------------------------------------------------------------------------------------------------------------------------------------------------------------------------------------------------------------------------------------------------------------------------------------------------------------------------------------------------------------------------------------------------------------------------------------------------------------------------------------------------------------------------------------------------------------------------------------------------------------------------------------------------------------------------------------------------------------------------------------------------------------------------------------------------------------------|------------------------------------------------------------------------------------------------------------------------------------------------------------------------------------------------------------------------------------------------------------------------------------------------------------------------------------------------------------------------------|
| 40 | Q86U28 | ISCA2_HUMAN | ISCA2_HBLD1       | Iron-sulfur cluster assembly 2 homolog, mitochondrial (HES8-like domain-containing protein 1)                                                                                                                                                                                                                                          | C79-C144-C146                                             | Fe <sub>2</sub> S <sub>2</sub> /Fe <sub>4</sub> S <sub>4</sub>      | Substrate - biogenesis       |                     | Mitochondrion          | No  | DISEASE: Multiple mitochondrial dysfunctions syndrome 4 (MMD54) [MIM:616370]: A severe disorder of systemic energy metabolism, resulting in weakness, respiratory failure, lack of neurologic development, lactic acidosis, hyperglycemia and early death. [ECO:0000269] PubMed:25539947. Note:The disease is caused by mutations affecting the gene represented in this entry.                                                                                                                                                                                                                                                                                                                                                                                                                                                                                                                                                                                                                                                                                                                                                                                                                                                                                                                                                                                                                                                                                                                                                                                                                                                                                                                                                                                                                                                                                                                                                                      | iron-sulfur cluster assembly [GO:0016226]; protein maturation [GO:0051604]; protein maturation by iron-sulfur cluster transfer [GO:0097428]; small molecule metabolic process [GO:0044281]                                                                                                                                                                                   |
| 41 | Q9H1K1 | ISCU_HUMAN  | ISCU_NIFUN        | Iron-sulfur cluster assembly enzyme ISCU, mitochondrial (NIFU-like N-terminal domain-containing protein) (NIFU-like protein)                                                                                                                                                                                                           | C69-C95-H137-C138                                         | Fe <sub>2</sub> S <sub>2</sub>                                      | Substrate - biogenesis       |                     | Mitochondrion          | No  | DISEASE: Myopathy with exercise intolerance Swedish type (MEIS) [MIM:255125]: Autosomal recessive metabolic disease characterized by lifelong severe exercise intolerance, in which minor exertion causes fatigue of active muscles, shortness of breath, and cardiac palpitations in association with lactic acidosis. The biochemical phenotype is characterized by a deficiency in mitochondrial iron-sulfur proteins and impaired muscle oxidative metabolism. [ECO:0000269] PubMed:18304977. Note:The disease is caused by mutations affecting the gene represented in this entry.                                                                                                                                                                                                                                                                                                                                                                                                                                                                                                                                                                                                                                                                                                                                                                                                                                                                                                                                                                                                                                                                                                                                                                                                                                                                                                                                                              | cellular iron ion homeostasis [GO:0006879]; iron-sulfur cluster assembly [GO:0016226]; protein maturation by iron-sulfur cluster transfer [GO:0097428]; small molecule metabolic process [GO:0044281]                                                                                                                                                                        |
| 42 | O43766 | LIAS_HUMAN  | LIAS_LAS_HUSSY-01 | Lipoyl synthase, mitochondrial (EC 2.8.1.8) (Lipoate synthase) (LS) (Lip-syn) (Lipoic acid synthase)                                                                                                                                                                                                                                   | C106-C111-C117; C137-C141-C144                            | 2 × Fe <sub>4</sub> S <sub>4</sub>                                  | Electron transfer, Catalytic | 2.8.1.8             | Mitochondrion          | No  | DISEASE: Hyperglycemia, lactic acidosis, and seizures (HGCLAS) [MIM:614462]: An enzymatic defect resulting in an autosomal recessive disorder of mitochondrial metabolism. It is characterized by early-onset lactic acidosis, severe encephalomyopathy, and a pyruvate oxidation defect. Affected individuals have neonatal-onset epilepsy, poor growth, psychomotor retardation, muscular hypotonia, lactic acidosis, and elevated glycine concentration in plasma and urine. [ECO:0000269] PubMed:22152680. Note:The disease is caused by mutations affecting the gene represented in this entry.                                                                                                                                                                                                                                                                                                                                                                                                                                                                                                                                                                                                                                                                                                                                                                                                                                                                                                                                                                                                                                                                                                                                                                                                                                                                                                                                                 | cellular nitrogen compound metabolic process [GO:0034641]; inflammatory response [GO:0006954]; lipoate biosynthetic process [GO:0009107]; neural tube closure [GO:0001843]; protein lipoylation [GO:0009249]; response to lipopolysaccharide [GO:0032496]; response to oxidative stress [GO:0006979]                                                                         |
| 43 | Q9NZB8 | MOCS1_HUMAN | MOCS1_MIG11       | Molybdenum cofactor biosynthesis protein 1 (Cell migration-inducing gene 11 protein) (Molybdenum cofactor synthesis-step 1 protein A-B) [Includes: GTP 3,β-cyclase (EC 4.1.99.22) (Molybdenum cofactor biosynthesis protein A), Cyclic pyranopterin monophosphate synthase (EC 4.6.1.17) (Molybdenum cofactor biosynthesis protein C)] | C80-C84-C87; C312-C315-C329                               | 2 × Fe <sub>4</sub> S <sub>4</sub>                                  | Catalytic, Structural        | 4.1.99.22; 4.6.1.17 | Unknown                | No  | DISEASE: Molybdenum cofactor deficiency, complementation group A (MOCODA) [MIM:252150]: An autosomal recessive metabolic disorder leading to the pleiotropic loss of molybdoenzyme activities. It is clinically characterized by onset in infancy of poor feeding, intractable seizures, severe psychomotor retardation, and death in early childhood in most patients. [ECO:0000269] PubMed:12754701, ECO:0000269 PubMed:16021469, ECO:0000269 PubMed:9731530, ECO:0000269 PubMed:9921896. Note:The disease is caused by mutations affecting the gene represented in this entry.                                                                                                                                                                                                                                                                                                                                                                                                                                                                                                                                                                                                                                                                                                                                                                                                                                                                                                                                                                                                                                                                                                                                                                                                                                                                                                                                                                    | molybdopterin cofactor biosynthetic process [GO:0032324]; Molybdopterin cofactor biosynthetic process [GO:0006777]                                                                                                                                                                                                                                                           |
| 44 | Q9UIF7 | MUTYH_HUMAN | MUTYH_MYH         | Adenine DNA glycosylase (EC 3.2.2.-) (MutY homolog) (hMTH)                                                                                                                                                                                                                                                                             | C287-C294-C297-C303                                       | Fe <sub>2</sub> S <sub>2</sub>                                      | Structural - Regulatory      | 3.2.2.-             | Mitochondrion, Nucleus | No  | DISEASE: Familial adenomatous polyposis 2 (FAP2) [MIM:608456]: A condition characterized by the development of multiple colorectal adenomatous polyps, benign neoplasms derived from glandular epithelium. Some affected individuals may develop colorectal carcinoma. [ECO:0000269] PubMed:11818965, ECO:0000269 PubMed:12606733, ECO:0000269 PubMed:12853198, ECO:0000269 PubMed:15366000, ECO:0000269 PubMed:16134147, ECO:0000269 PubMed:16287072, ECO:0000269 PubMed:16557584, ECO:0000269 PubMed:16941501, ECO:0000269 PubMed:18091433, ECO:0000269 PubMed:18515411, ECO:0000269 PubMed:19953527, ECO:0000269 PubMed:20418187, ECO:0000269 PubMed:20848659, ECO:0000269 PubMed:25820570, ECO:0000269 PubMed:26694661. Note:The disease is caused by mutations affecting the gene represented in this entry.; DISEASE: Gastric cancer (GASC) [MIM:613659]: A malignant disease which starts in the stomach, can spread to the esophagus or the small intestine, and can extend through the stomach wall to nearby lymph nodes and organs. It also can metastasize to other parts of the body. The term gastric cancer or gastric carcinoma refers to adenocarcinoma of the stomach that accounts for most of all gastric malignant tumors. Two main histologic types are recognized, diffuse type and intestinal type carcinomas. Diffuse tumors are poorly differentiated infiltrating lesions, resulting in thickening of the stomach. In contrast, intestinal tumors are usually exophytic, often ulcerating, and associated with intestinal metaplasia of the stomach, most often observed in sporadic disease. [ECO:0000269] PubMed:15273732, ECO:0000269 PubMed:25820570. Note-The gene represented in this entry may be involved in disease pathogenesis. Somatic mutations contribute to the development of a sub-set of sporadic gastric cancers in carriers of Helicobacter pylori (PubMed:15273732). (ECO:0000269) PubMed:15273732). | depurination [GO:0045007]; DNA repair [GO:0006281]; mismatch repair [GO:0006298]                                                                                                                                                                                                                                                                                             |
| 45 | Q9UHQ1 | NARF_HUMAN  | NARF              | Nuclear prelamin A recognition factor (Iron-only hydrogenase-like protein 2) (IOP2)                                                                                                                                                                                                                                                    | C172-C228-C374-C378                                       | 2 × Fe <sub>4</sub> S <sub>4</sub>                                  | Unknown                      |                     | Nucleus                | No  |                                                                                                                                                                                                                                                                                                                                                                                                                                                                                                                                                                                                                                                                                                                                                                                                                                                                                                                                                                                                                                                                                                                                                                                                                                                                                                                                                                                                                                                                                                                                                                                                                                                                                                                                                                                                                                                                                                                                                      |                                                                                                                                                                                                                                                                                                                                                                              |
| 46 | Q9H6Q4 | NARFL_HUMAN | NARFL_PRN         | Cytosolic Fe-S cluster assembly factor NARFL (Iron-only hydrogenase-like protein 1) (OP1) (Nuclear prelamin A recognition factor-like protein) (Protein related to Narf)                                                                                                                                                               | C24-C71-C74-C77; C190-C246-C395-C399                      | 2 × Fe <sub>4</sub> S <sub>4</sub>                                  | Substrate - biogenesis       |                     | Unknown                | No  |                                                                                                                                                                                                                                                                                                                                                                                                                                                                                                                                                                                                                                                                                                                                                                                                                                                                                                                                                                                                                                                                                                                                                                                                                                                                                                                                                                                                                                                                                                                                                                                                                                                                                                                                                                                                                                                                                                                                                      | hematopoietic progenitor cell differentiation [GO:0002244]; iron-sulfur cluster assembly [GO:0016226]; oxygen homeostasis [GO:0032364]; regulation of gene expression [GO:0010468]; response to hypoxia [GO:0001666]                                                                                                                                                         |
| 47 | P28331 | NDUS1_HUMAN | NDUS1             | NADH-ubiquinone oxidoreductase 75 kDa subunit, mitochondrial (EC 1.6.5.3) (EC 1.6.99.3) (Complex I-75kD) (CI-75kD)                                                                                                                                                                                                                     | C64-C75-C78-C92; H124-C128-C131-C137; C176-C179-C182-C226 | 2 × Fe <sub>4</sub> S <sub>4</sub> , Fe <sub>2</sub> S <sub>2</sub> | Electron transfer            | 1.6.5.3; 1.6.99.3   | Mitochondrion          | Yes | DISEASE: Mitochondrial complex I deficiency (MT-C1D) [MIM:252010]: A disorder of the mitochondrial respiratory chain that causes a wide range of clinical manifestations from lethal neonatal disease to adult-onset neurodegenerative disorders. Phenotypes include macrocephaly with progressive leukodystrophy, non-specific encephalopathy, cardiomyopathy, myopathy, liver disease, Leigh syndrome, Leber hereditary optic neuropathy, and some forms of Parkinson disease. [ECO:0000269] PubMed:11349233. Note:The disease is caused by mutations affecting the gene represented in this entry.                                                                                                                                                                                                                                                                                                                                                                                                                                                                                                                                                                                                                                                                                                                                                                                                                                                                                                                                                                                                                                                                                                                                                                                                                                                                                                                                                | apoptotic mitochondrial changes [GO:0008637]; ATP metabolic process [GO:0046034]; cellular respiration [GO:0045333]; mitochondrial electron transport, NADH to ubiquinone [GO:0006120]; mitochondrial respiratory chain complex I assembly [GO:0032981]; reactive oxygen species metabolic process [GO:0072593]; regulation of mitochondrial membrane potential [GO:0051881] |
| 48 | O75306 | NDUS2_HUMAN | NDUS2             | NADH dehydrogenase [ubiquinone] iron-sulfur protein 2, mitochondrial (EC 1.6.5.3) (EC 1.6.99.3) (Complex I-49kD) (CI-49kD) (NADH-ubiquinone oxidoreductase 49 kDa subunit)                                                                                                                                                             | C326-C332-C347                                            | Fe <sub>4</sub> S <sub>4</sub>                                      | Electron transfer            | 1.6.5.3; 1.6.99.3   | Mitochondrion          | Yes | DISEASE: Mitochondrial complex I deficiency (MT-C1D) [MIM:252010]: A disorder of the mitochondrial respiratory chain that causes a wide range of clinical manifestations from lethal neonatal disease to adult-onset neurodegenerative disorders. Phenotypes include macrocephaly with progressive leukodystrophy, non-specific encephalopathy, cardiomyopathy, myopathy, liver disease, Leigh syndrome, Leber hereditary optic neuropathy, and some forms of Parkinson disease. [ECO:0000269] PubMed:11220739. Note-The disease is caused by mutations affecting the gene represented in this entry.                                                                                                                                                                                                                                                                                                                                                                                                                                                                                                                                                                                                                                                                                                                                                                                                                                                                                                                                                                                                                                                                                                                                                                                                                                                                                                                                                | mitochondrial ATP synthesis coupled electron transport [GO:0042775]; mitochondrial electron transport, NADH to ubiquinone [GO:0006120]; mitochondrial respiratory chain complex I assembly [GO:0032981]; response to oxidative stress [GO:0006979]                                                                                                                           |

|    |        |             |                    |                                                                                                                                                                                                         |                                          |                                                                                   |                         |                    |                          |     |                                                                                                                                                                                                                                                                                                                                                                                                                                                                                                                                                                                                                                                                                                                                                                                                                                                                                                                                                                                                                                                                                                                                                                                                                                                                                                |                                                                                                                                                                                                                                                                                                                                                                    |
|----|--------|-------------|--------------------|---------------------------------------------------------------------------------------------------------------------------------------------------------------------------------------------------------|------------------------------------------|-----------------------------------------------------------------------------------|-------------------------|--------------------|--------------------------|-----|------------------------------------------------------------------------------------------------------------------------------------------------------------------------------------------------------------------------------------------------------------------------------------------------------------------------------------------------------------------------------------------------------------------------------------------------------------------------------------------------------------------------------------------------------------------------------------------------------------------------------------------------------------------------------------------------------------------------------------------------------------------------------------------------------------------------------------------------------------------------------------------------------------------------------------------------------------------------------------------------------------------------------------------------------------------------------------------------------------------------------------------------------------------------------------------------------------------------------------------------------------------------------------------------|--------------------------------------------------------------------------------------------------------------------------------------------------------------------------------------------------------------------------------------------------------------------------------------------------------------------------------------------------------------------|
| 49 | O75251 | NDUS7_HUMAN | NDUFS7             | NADH dehydrogenase [ubiquinone] iron-sulfur protein 7, mitochondrial (EC 1.6.5.3) (EC 1.6.99.3) (Complex I-20kD) (CI-20kD) (NADH-ubiquinone oxidoreductase 20 kDa subunit) (PSST subunit)               | C88-C89-C153-C183                        | Fe <sub>2</sub> S <sub>4</sub>                                                    | Electron transfer       | 1.6.5.3; 1.6.99.3  | Mitochondrion            | No  | DISEASE: Leigh syndrome (LS) [MIM:256000]: An early-onset progressive neurodegenerative disorder characterized by the presence of focal, bilateral lesions in one or more areas of the central nervous system including the brainstem, thalamus, basal ganglia, cerebellum and spinal cord. Clinical features depend on which areas of the central nervous system are involved and include subacute onset of psychomotor retardation, hypotonia, ataxia, weakness, vision loss, eye movement abnormalities, seizures, and dysphagia. [ECO:0000269] PubMed:10360771. Note:The disease is caused by mutations affecting the gene represented in this entry.; DISEASE: Mitochondrial complex I deficiency (MT-C1D) [MIM:252010]: A disorder of the mitochondrial respiratory chain that causes a wide range of clinical manifestations from lethal neonatal disease to adult-onset neurodegenerative disorders. Phenotypes include macrocephaly with progressive leukodystrophy, non-specific encephalopathy, cardiomyopathy, myopathy, liver disease, Leigh syndrome, Leber hereditary optic neuropathy, and some forms of Parkinson disease. [ECO:0000269] PubMed:10330338. Note:The disease is caused by mutations affecting the gene represented in this entry.                               | mitochondrial electron transport, NADH to ubiquinone [GO:0006120]; mitochondrial respiratory chain complex I assembly [GO:0032981]                                                                                                                                                                                                                                 |
| 50 | O00217 | NDUS8_HUMAN | NDUFS8             | NADH dehydrogenase [ubiquinone] iron-sulfur protein 8, mitochondrial (EC 1.6.5.3) (EC 1.6.99.3) (Complex I-23kD) (CI-23kD) (NADH-ubiquinone oxidoreductase 23 kDa subunit) (TYKY subunit)               | C111-C114-C117-C160; C121-C150-C153-C156 | 2 × Fe <sub>2</sub> S <sub>4</sub>                                                | Electron transfer       | 1.6.5.3; 1.6.99.3  | Mitochondrion            | No  | DISEASE: Leigh syndrome (LS) [MIM:256000]: An early-onset progressive neurodegenerative disorder characterized by the presence of focal, bilateral lesions in one or more areas of the central nervous system including the brainstem, thalamus, basal ganglia, cerebellum and spinal cord. Clinical features depend on which areas of the central nervous system are involved and include subacute onset of psychomotor retardation, hypotonia, ataxia, weakness, vision loss, eye movement abnormalities, seizures, and dysphagia. [ECO:0000269] PubMed:9837812. Note:The disease is caused by mutations affecting the gene represented in this entry.                                                                                                                                                                                                                                                                                                                                                                                                                                                                                                                                                                                                                                       | mitochondrial electron transport, NADH to ubiquinone [GO:0006120]; mitochondrial respiratory chain complex I assembly [GO:0032981]; response to oxidative stress [GO:0006979]                                                                                                                                                                                      |
| 51 | P49821 | NDUV1_HUMAN | NDUFV1 UQOR1       | NADH dehydrogenase [ubiquinone] flavoprotein 1, mitochondrial (EC 1.6.5.3) (EC 1.6.99.3) (Complex I-51kD) (CI-51kD) (NADH dehydrogenase flavoprotein 1) (NADH-ubiquinone oxidoreductase 51 kDa subunit) | C379-C382-C385-C425                      | Fe <sub>2</sub> S <sub>4</sub>                                                    | Electron transfer       | 1.6.5.3; 1.6.99.3  | Mitochondrion            | Yes | DISEASE: Leigh syndrome (LS) [MIM:256000]: An early-onset progressive neurodegenerative disorder characterized by the presence of focal, bilateral lesions in one or more areas of the central nervous system including the brainstem, thalamus, basal ganglia, cerebellum and spinal cord. Clinical features depend on which areas of the central nervous system are involved and include subacute onset of psychomotor retardation, hypotonia, ataxia, weakness, vision loss, eye movement abnormalities, seizures, and dysphagia. [ECO:0000269] PubMed:10080174. Note:The disease is caused by mutations affecting the gene represented in this entry.; DISEASE: Mitochondrial complex I deficiency (MT-C1D) [MIM:252010]: A disorder of the mitochondrial respiratory chain that causes a wide range of clinical manifestations from lethal neonatal disease to adult-onset neurodegenerative disorders. Phenotypes include macrocephaly with progressive leukodystrophy, non-specific encephalopathy, cardiomyopathy, myopathy, liver disease, Leigh syndrome, Leber hereditary optic neuropathy, and some forms of Parkinson disease. [ECO:0000269] PubMed:10080174, ECO:0000269] PubMed:11349233. Note:The disease is caused by mutations affecting the gene represented in this entry. | mitochondrial ATP synthesis coupled electron transport [GO:0042775]; mitochondrial electron transport, NADH to ubiquinone [GO:0006120]; mitochondrial respiratory chain complex I assembly [GO:0032981]                                                                                                                                                            |
| 52 | P19404 | NDUV2_HUMAN | NDUFV2             | NADH dehydrogenase [ubiquinone] flavoprotein 2, mitochondrial (EC 1.6.5.3) (EC 1.6.99.3) (NADH-ubiquinone oxidoreductase 24 kDa subunit)                                                                | C135-C140-C176-C180                      | Fe <sub>2</sub> S <sub>2</sub>                                                    | Electron transfer       | 1.6.5.3; 1.6.99.3  | Mitochondrion            | Yes |                                                                                                                                                                                                                                                                                                                                                                                                                                                                                                                                                                                                                                                                                                                                                                                                                                                                                                                                                                                                                                                                                                                                                                                                                                                                                                | cardiac muscle tissue development [GO:0048738]; mitochondrial electron transport, NADH to ubiquinone [GO:0006120]; mitochondrial respiratory chain complex I assembly [GO:0032981]; nervous system development [GO:0007399]                                                                                                                                        |
| 53 | Q9Y697 | NFS1_HUMAN  | NFS1 NIFS HUSSY-08 | Cysteine desulfurase, mitochondrial (EC 2.8.1.7)                                                                                                                                                        | C381                                     | Fe <sub>2</sub> S <sub>2</sub>                                                    | Substrate - biogenesis  | 2.8.1.7            | Mitochondrion            | No  |                                                                                                                                                                                                                                                                                                                                                                                                                                                                                                                                                                                                                                                                                                                                                                                                                                                                                                                                                                                                                                                                                                                                                                                                                                                                                                | [2Fe-2S] cluster assembly [GO:0044571]; iron incorporation into metallo-sulfur cluster [GO:0018283]; molybdopterin cofactor biosynthetic process [GO:0032324]; Mo-molybdopterin cofactor biosynthetic process [GO:0006777]; protein complex assembly [GO:0006461]; small molecule metabolic process [GO:0044281]; sulfur amino acid metabolic process [GO:0000096] |
| 54 | Q9UM50 | NFU1_HUMAN  | NFU1 HIRIPS CGI-33 | NFU1 iron-sulfur cluster scaffold homolog, mitochondrial (HIRA-interacting protein 5)                                                                                                                   | C210-C213                                | Fe <sub>2</sub> S <sub>4</sub>                                                    | Substrate - biogenesis  |                    | Cytoplasm, Mitochondrion | No  | DISEASE: Multiple mitochondrial dysfunctions syndrome 1 (MMDS1) [MIM:605711]: A severe disorder of systemic energy metabolism, resulting in weakness, respiratory failure, lack of neurologic development, lactic acidosis, hyperglycemia and early death. Some patients show failure to thrive, pulmonary hypertension, hypotonia and irritability. Biochemical features include severe combined deficiency of the 2-oxoacid dehydrogenases, defective lipoic acid synthesis and reduction in activity of mitochondrial respiratory chain complexes. [ECO:0000269] PubMed:21944046, ECO:0000269] PubMed:22077971, ECO:0000269] PubMed:25918518, ECO:0000269] PubMed:28161430, ECO:0000269] PubMed:28906594. Note:The disease is caused by mutations affecting the gene represented in this entry.                                                                                                                                                                                                                                                                                                                                                                                                                                                                                             | iron-sulfur cluster assembly [GO:0016226]                                                                                                                                                                                                                                                                                                                          |
| 55 | P78549 | NTH_HUMAN   | NTHL1 NTH1 OCTS3   | Endonuclease III-like protein 1 (NTH1) (EC 3.2.2.-) (EC 4.2.99.18) (Bifunctional DNA N-glycosylase/DNA-(apurinic or apyrimidinic site) lyase) (DNA glycosylase/AP lyase)                                | C290-C297-C300-C306                      | Fe <sub>2</sub> S <sub>4</sub>                                                    | Structural - Regulatory | 3.2.2.-; 4.2.99.18 | Mitochondrion, Nucleus   | No  | DISEASE: Familial adenomatous polyposis 3 (FAP3) [MIM:616415]: A form of familial adenomatous polyposis, a condition characterized by the development of multiple colorectal adenomatous polyps, benign neoplasms derived from glandular epithelium. Some affected individuals may develop colorectal carcinoma. [ECO:0000269] PubMed:25938944. Note:The disease is caused by mutations affecting the gene represented in this entry.                                                                                                                                                                                                                                                                                                                                                                                                                                                                                                                                                                                                                                                                                                                                                                                                                                                          | base-excision repair, AP site formation [GO:0006285]; deprimidination [GO:0045008]; nucleotide-excision repair, DNA incision, 5'-to lesion [GO:0006296]                                                                                                                                                                                                            |
| 56 | P53384 | NUBP1_HUMAN | NUBP1 NBP NBP1     | Cytosolic Fe-S cluster assembly factor NUBP1 (Nucleotide-binding protein 1) (NBP 1)                                                                                                                     | C8-C22-C25-C31; C235-C238                | Fe <sub>2</sub> S <sub>4</sub> , Fe <sub>2</sub> S <sub>3</sub> shared with NUBP2 | Substrate - biogenesis  |                    | Cytoplasm, Nucleus       | No  |                                                                                                                                                                                                                                                                                                                                                                                                                                                                                                                                                                                                                                                                                                                                                                                                                                                                                                                                                                                                                                                                                                                                                                                                                                                                                                | cell growth [GO:0016049]; cell projection organization [GO:0030030]; cellular iron homeostasis [GO:0006879]; centrosome localization [GO:0051642]; iron-sulfur cluster assembly [GO:0016226]; negative regulation of centrosome duplication [GO:0010826]; protein localization to cell cortex [GO:0072697]                                                         |
| 57 | Q9YSV2 | NUBP2_HUMAN | NUBP2              | Cytosolic Fe-S cluster assembly factor NUBP2 (Nucleotide-binding protein 2) (NBP 2)                                                                                                                     | C196-C199                                | Fe <sub>2</sub> S <sub>4</sub> shared with NUBP1                                  | Substrate - biogenesis  |                    | Cytoplasm, Nucleus       | No  |                                                                                                                                                                                                                                                                                                                                                                                                                                                                                                                                                                                                                                                                                                                                                                                                                                                                                                                                                                                                                                                                                                                                                                                                                                                                                                | cell projection organization [GO:0030030]; iron-sulfur cluster assembly [GO:0016226]                                                                                                                                                                                                                                                                               |
| 58 | Q8TB37 | NUBPL_HUMAN | NUBPL C14orf127    | Iron-sulfur protein NUBPL (IND1 homolog) (Nucleotide-binding protein-like) (nuind1)                                                                                                                     | C244-C247                                | Fe <sub>2</sub> S <sub>2</sub> /Fe <sub>2</sub> S <sub>4</sub>                    | Substrate - biogenesis  |                    | Mitochondrion            | No  | DISEASE: Mitochondrial complex I deficiency (MT-C1D) [MIM:252010]: A disorder of the mitochondrial respiratory chain that causes a wide range of clinical manifestations from lethal neonatal disease to adult-onset neurodegenerative disorders. Phenotypes include macrocephaly with progressive leukodystrophy, non-specific encephalopathy, cardiomyopathy, myopathy, liver disease, Leigh syndrome, Leber hereditary optic neuropathy, and some forms of Parkinson disease. [ECO:0000269] PubMed:20818383, ECO:0000269] PubMed:23553477. Note:The disease is caused by mutations affecting the gene represented in this entry.                                                                                                                                                                                                                                                                                                                                                                                                                                                                                                                                                                                                                                                            | mitochondrial respiratory chain complex I assembly [GO:0032981]; mitochondrion morphogenesis [GO:0070584]                                                                                                                                                                                                                                                          |
| 59 | P49643 | PR12_HUMAN  | PRIM2 PRIM2A       | DNA primase large subunit (EC 2.7.7.-) (DNA primase 58 kDa subunit) (p58)                                                                                                                               | C287-C367-C384-C424                      | Fe <sub>2</sub> S <sub>4</sub>                                                    | Structural - Regulatory | 2.7.7.-            | Unknown                  | No  |                                                                                                                                                                                                                                                                                                                                                                                                                                                                                                                                                                                                                                                                                                                                                                                                                                                                                                                                                                                                                                                                                                                                                                                                                                                                                                | DNA replication, synthesis of RNA primer [GO:0006269]; DNA replication initiation [GO:0006270]; G1/S transition of mitotic cell cycle [GO:0000082]; telomere maintenance via semi-conservative replication [GO:0032201]                                                                                                                                            |

|    |        |             |                             |                                                                                                                                                                                                                                                                                                                                                                                                                                                           |                                                        |                                                                                                  |                         |          |                                                                  |     |                                                                                                                                                                                                                                                                                                                                                                                                                                                                                                                                                                                                                                                                                                                                                                                                                                                                                                                                                                                                                                                                                                                                                                                                                                                                                                                                                                                                                                                                                                                                                                                                                                                                                                                                                                                                                                                                                                                                                                                                                                                                                                                                                                                                                                                         |
|----|--------|-------------|-----------------------------|-----------------------------------------------------------------------------------------------------------------------------------------------------------------------------------------------------------------------------------------------------------------------------------------------------------------------------------------------------------------------------------------------------------------------------------------------------------|--------------------------------------------------------|--------------------------------------------------------------------------------------------------|-------------------------|----------|------------------------------------------------------------------|-----|---------------------------------------------------------------------------------------------------------------------------------------------------------------------------------------------------------------------------------------------------------------------------------------------------------------------------------------------------------------------------------------------------------------------------------------------------------------------------------------------------------------------------------------------------------------------------------------------------------------------------------------------------------------------------------------------------------------------------------------------------------------------------------------------------------------------------------------------------------------------------------------------------------------------------------------------------------------------------------------------------------------------------------------------------------------------------------------------------------------------------------------------------------------------------------------------------------------------------------------------------------------------------------------------------------------------------------------------------------------------------------------------------------------------------------------------------------------------------------------------------------------------------------------------------------------------------------------------------------------------------------------------------------------------------------------------------------------------------------------------------------------------------------------------------------------------------------------------------------------------------------------------------------------------------------------------------------------------------------------------------------------------------------------------------------------------------------------------------------------------------------------------------------------------------------------------------------------------------------------------------------|
| 60 | Q06203 | PURI_HUMAN  | PPAT GPAT                   | Amidophosphoribosyltransferase (ATase) (EC 2.4.2.14) (Glutamine phosphoribosylpyrophosphate amidotransferase) (GPAT)                                                                                                                                                                                                                                                                                                                                      | C280-C426-C503-C506                                    | Fe <sub>2</sub> S <sub>4</sub>                                                                   | Unknown                 | 2.4.2.14 | Unknown                                                          | No  | 'de novo' IMP biosynthetic process [GO:0006189]; animal organ regeneration [GO:0031100]; cellular response to drug [GO:0035690]; cellular response to insulin stimulus [GO:0032869]; G1/S transition of mitotic cell cycle [GO:0000082]; glutamine catabolic process [GO:0006543]; kidney development [GO:0001822]; lactation [GO:0007595]; maternal process involved in female pregnancy [GO:0060135]; nucleoside metabolic process [GO:0009116]; protein homotrimerization [GO:0051289]; purine nucleobase biosynthetic process [GO:0009113]; purine nucleotide biosynthetic process [GO:0006164]; purine ribonucleoside monophosphate biosynthetic process [GO:0009168]                                                                                                                                                                                                                                                                                                                                                                                                                                                                                                                                                                                                                                                                                                                                                                                                                                                                                                                                                                                                                                                                                                                                                                                                                                                                                                                                                                                                                                                                                                                                                                              |
| 61 | O60673 | REV3L_HUMAN | REV3L POLZ REV3             | DNA polymerase zeta catalytic subunit (EC 2.7.7.7) (Protein reversionless 3-like) (REV3-like) (HREV3)                                                                                                                                                                                                                                                                                                                                                     | C3086-C3089-C3099-C3104                                | Fe <sub>2</sub> S <sub>4</sub>                                                                   | Structural - Regulatory | 2.7.7.7  | Nucleus                                                          | No  | DNA-dependent DNA replication [GO:0006261]; error-prone translesion synthesis [GO:0042276]                                                                                                                                                                                                                                                                                                                                                                                                                                                                                                                                                                                                                                                                                                                                                                                                                                                                                                                                                                                                                                                                                                                                                                                                                                                                                                                                                                                                                                                                                                                                                                                                                                                                                                                                                                                                                                                                                                                                                                                                                                                                                                                                                              |
| 62 | Q8TAC1 | RFESD_HUMAN | RFESD                       | Rieske domain-containing protein                                                                                                                                                                                                                                                                                                                                                                                                                          | C57-H59-C80-H83                                        | Fe <sub>2</sub> S <sub>2</sub> (predicted)                                                       | Unknown                 |          | Unknown                                                          | No  |                                                                                                                                                                                                                                                                                                                                                                                                                                                                                                                                                                                                                                                                                                                                                                                                                                                                                                                                                                                                                                                                                                                                                                                                                                                                                                                                                                                                                                                                                                                                                                                                                                                                                                                                                                                                                                                                                                                                                                                                                                                                                                                                                                                                                                                         |
| 63 | Q9HA92 | RSAD1_HUMAN | RSAD1                       | Radical S-adenosyl methionine domain-containing protein 1, mitochondrial (EC 1.3.99.-) (Oxygen-independent coproporphyrinogen-III oxidase-like protein RSAD1)                                                                                                                                                                                                                                                                                             | C49-C53-C56                                            | Fe <sub>2</sub> S <sub>4</sub>                                                                   | Catalytic               | 1.3.99.- | Mitochondrion                                                    | No  | porphyrin-containing compound biosynthetic process [GO:0006779]                                                                                                                                                                                                                                                                                                                                                                                                                                                                                                                                                                                                                                                                                                                                                                                                                                                                                                                                                                                                                                                                                                                                                                                                                                                                                                                                                                                                                                                                                                                                                                                                                                                                                                                                                                                                                                                                                                                                                                                                                                                                                                                                                                                         |
| 64 | Q8WXG1 | RSAD2_HUMAN | RSAD2 CIG5                  | Radical S-adenosyl methionine domain-containing protein 2 (Cytomegalovirus-induced gene 5 protein) (Viperin) (Virus inhibitory protein, endoplasmic reticulum-associated, interferon-inducible)                                                                                                                                                                                                                                                           | C83-C87-C90                                            | Fe <sub>2</sub> S <sub>4</sub>                                                                   | Unknown                 |          | Cytoplasm, Endoplasmic reticulum, Golgi apparatus, Mitochondrion | Yes | CD4-positive, alpha-beta T cell activation [GO:0035710]; CD4-positive, alpha-beta T cell differentiation [GO:0043367]; defense response to virus [GO:0051607]; negative regulation of protein secretion [GO:0050709]; negative regulation of viral genome replication [GO:0045071]; positive regulation of T-helper 2 cell cytokine production [GO:2000553]; positive regulation of toll-like receptor 7 signaling pathway [GO:0034157]; positive regulation of toll-like receptor 9 signaling pathway [GO:0034165]; response to virus [GO:0009615]; type I interferon signaling pathway [GO:0060337]; viral process [GO:0016032]                                                                                                                                                                                                                                                                                                                                                                                                                                                                                                                                                                                                                                                                                                                                                                                                                                                                                                                                                                                                                                                                                                                                                                                                                                                                                                                                                                                                                                                                                                                                                                                                                       |
| 65 | Q9NZ71 | RTEL1_HUMAN | RTEL1 C20orf41 KIAA1088 NHL | Regulator of telomere elongation helicase 1 (EC 3.6.4.12) (Novel helicase-like)                                                                                                                                                                                                                                                                                                                                                                           | C145-C163-C172-C207                                    | Fe <sub>2</sub> S <sub>4</sub>                                                                   | Structural - Regulatory | 3.6.4.12 | Nucleus                                                          | No  | DISEASE: Dyskeratosis congenita, autosomal recessive, 5 (DKCB5) [MIM:615190]; A form of dyskeratosis congenita, a rare multisystem disorder caused by defective telomere maintenance. It is characterized by progressive bone marrow failure, and the clinical triad of reticulated skin hyperpigmentation, nail dystrophy, and mucosal leukoplakia. Common but variable features include premature graying, aplastic anemia, low platelets, osteoporosis, pulmonary fibrosis, and liver fibrosis among others. Early mortality is often associated with bone marrow failure, infections, fatal pulmonary complications, or malignancy. DKCB5 is characterized by onset of bone marrow failure and immunodeficiency in early childhood. Most patients also have growth and developmental delay and cerebellar hypoplasia, consistent with a clinical diagnosis of Hoyeraal-Hreidarsson syndrome. [ECO:0000269] PubMed:23329068, ECO:0000269 PubMed:23453664, ECO:0000269 PubMed:23591994, ECO:0000269 PubMed:23959892, ECO:0000269 PubMed:2409516. Note=The disease is caused by mutations affecting the gene represented in this entry. RTEL1 mutations have also been found in patients with a dyskeratosis congenita-like phenotype consisting of one feature of dyskeratosis congenita and short telomeres, in the absence of the typical DKC diagnostic triad [PubMed:23329068]. [ECO:0000269] PubMed:23329068]; DISEASE: Dyskeratosis congenita, autosomal dominant, 4 (DKCA4) [MIM:615190]; A rare multisystem disorder caused by defective telomere maintenance. It is characterized by progressive bone marrow failure, and the clinical triad of reticulated skin hyperpigmentation, nail dystrophy, and mucosal leukoplakia. Common but variable features include premature graying, aplastic anemia, low platelets, osteoporosis, pulmonary fibrosis, and liver fibrosis among others. Early mortality is often associated with bone marrow failure, infections, fatal pulmonary complications, or malignancy. [ECO:0000269] PubMed:23329068. Note=The disease is caused by mutations affecting the gene represented in this entry.; DISEASE: Pulmonary fibrosis, and/or bone marrow failure, telomere-related, 3 (PFBMFT3) [MIM:616373]; A |
| 66 | P21912 | SDHB_HUMAN  | SDHB SDH SDH1               | Succinate dehydrogenase [ubiquinone] iron-sulfur subunit, mitochondrial (EC 1.3.5.1) (iron-sulfur subunit of complex III) (Ii)                                                                                                                                                                                                                                                                                                                            | C93-C98-C101-C113; C186-C189-C192-C253; C196-C243-C249 | Fe <sub>2</sub> S <sub>2</sub> , Fe <sub>2</sub> S <sub>4</sub> , Fe <sub>2</sub> S <sub>4</sub> | Electron transfer       | 1.3.5.1  | Mitochondrion                                                    | Yes | DISEASE: Pheochromocytoma (PCC) [MIM:171300]; A catecholamine-producing tumor of chromaffin tissue of the adrenal medulla or sympathetic paraganglia. The cardinal symptom, reflecting the increased secretion of epinephrine and norepinephrine, is hypertension, which may be persistent or intermittent. [ECO:0000269] PubMed:11404820, ECO:0000269 PubMed:12000816, ECO:0000269 PubMed:12618761, ECO:0000269 PubMed:14500403, ECO:0000269 PubMed:14974914, ECO:0000269 PubMed:15328326, ECO:0000269 PubMed:17634472. Note=Disease susceptibility is associated with variations affecting the gene represented in this entry.; DISEASE: Paragangliomas 4 (PGL4) [MIM:115110]; A neural crest tumor usually derived from the chromoreceptor tissue of a paraganglion. Paragangliomas can develop at various body sites, including the head, neck, thorax and abdomen. Most commonly, they are located in the head and neck region, specifically at the carotid bifurcation, the jugular foramen, the vagal nerve, and in the middle ear. [ECO:0000269] PubMed:11404820, ECO:0000269 PubMed:11897817, ECO:0000269 PubMed:14715873, ECO:0000269 PubMed:14974914, ECO:0000269 PubMed:15328326. Note=The disease is caused by mutations affecting the gene represented in this entry.; DISEASE: Paraganglioma and gastric stromal sarcoma (PGSS) [MIM:608864]; Gastrointestinal stromal tumors may be sporadic or inherited in an autosomal dominant manner, alone or as a component of a syndrome associated with other tumors, such as in the context of neurofibromatosis type 1 (NF1). Patients have both gastrointestinal stromal tumors and paragangliomas. Susceptibility to the tumors was inherited in an apparently autosomal dominant manner, with incomplete penetrance. [ECO:0000269] PubMed:17804857. Note=The disease is caused by mutations affecting the gene represented in this entry.; DISEASE: Cowden syndrome 2 (CWS2) [MIM:612359]; A form of Cowden syndrome, a hamartomatous polyposis syndrome with age-related penetrance. Cowden syndrome is characterized by hamartomatous                                                                                                                                                   |
| 67 | Q6NUM6 | TYW1B_HUMAN | TYW1B RSAFD2                | S-adenosyl-L-methionine-dependent tRNA 4-demethylsine synthase (EC 4.1.3.44) (Radical S-adenosyl methionine and flavodoxin domain-containing protein 2) (tRNA wybutosine-synthesizing protein 1 homolog B)                                                                                                                                                                                                                                                | C352-C356-C359                                         | Fe <sub>2</sub> S <sub>4</sub>                                                                   | Catalytic               | 4.1.3.44 | Unknown                                                          | No  | oxidation-reduction process [GO:0055114]; tRNA processing [GO:0008033]                                                                                                                                                                                                                                                                                                                                                                                                                                                                                                                                                                                                                                                                                                                                                                                                                                                                                                                                                                                                                                                                                                                                                                                                                                                                                                                                                                                                                                                                                                                                                                                                                                                                                                                                                                                                                                                                                                                                                                                                                                                                                                                                                                                  |
| 68 | P47985 | UCRI_HUMAN  | UQCRCF51                    | Cytochrome b-c1 complex subunit Rieske, mitochondrial (EC 1.10.2.2) (Complex III subunit 5) (Cytochrome b-c1 complex subunit 5) (Rieske iron-sulfur protein) (RISP) (Rieske protein UQCRCF51) (Ubiquinol-cytochrome c reductase iron-sulfur subunit) (Cleaved into: Cytochrome b-c1 complex subunit 9 (Su9) (Subunit 9) (8 kDa subunit 9) (Complex III subunit IX) (Cytochrome b-c1 complex subunit 11) (Ubiquinol-cytochrome c reductase 8 kDa protein)) | C217-H219-C236-H239                                    | Fe <sub>2</sub> S <sub>2</sub>                                                                   | Electron transfer       | 1.10.2.2 | Mitochondrion                                                    | Yes | mitochondrial electron transport, ubiquinol to cytochrome c [GO:0006122]; response to antibiotic [GO:0046677]; response to drug [GO:0042493]; response to hormone [GO:0009725]                                                                                                                                                                                                                                                                                                                                                                                                                                                                                                                                                                                                                                                                                                                                                                                                                                                                                                                                                                                                                                                                                                                                                                                                                                                                                                                                                                                                                                                                                                                                                                                                                                                                                                                                                                                                                                                                                                                                                                                                                                                                          |

|    |        |             |                       |                                                                                                                                                             |                                      |                                            |                   |                    |                                            |    |                                                                                                                                                                                                                                                                                                                                                                                                                                                                                                                                                              |                                                                                                                                                                                                                                                                                                                                                                                                                                                                                                                                                                                                                                                                                                                                                                                                                                       |
|----|--------|-------------|-----------------------|-------------------------------------------------------------------------------------------------------------------------------------------------------------|--------------------------------------|--------------------------------------------|-------------------|--------------------|--------------------------------------------|----|--------------------------------------------------------------------------------------------------------------------------------------------------------------------------------------------------------------------------------------------------------------------------------------------------------------------------------------------------------------------------------------------------------------------------------------------------------------------------------------------------------------------------------------------------------------|---------------------------------------------------------------------------------------------------------------------------------------------------------------------------------------------------------------------------------------------------------------------------------------------------------------------------------------------------------------------------------------------------------------------------------------------------------------------------------------------------------------------------------------------------------------------------------------------------------------------------------------------------------------------------------------------------------------------------------------------------------------------------------------------------------------------------------------|
| 69 | POC7P4 | UCRIL_HUMAN | UQCRFS1P1<br>UQCRFSL1 | Putative cytochrome b-c1 complex subunit Rieske-like protein 1 (Ubiquinol-cytochrome c reductase Rieske iron-sulfur subunit pseudogene 1)                   | C226-H228-C231-C245-H248             | Fe <sub>2</sub> S <sub>2</sub> (predicted) | Unknown           |                    | Unknown                                    | No |                                                                                                                                                                                                                                                                                                                                                                                                                                                                                                                                                              |                                                                                                                                                                                                                                                                                                                                                                                                                                                                                                                                                                                                                                                                                                                                                                                                                                       |
| 70 | P47989 | XDH_HUMAN   | XDH XDH4              | xanthine dehydrogenase/oxidase [Includes: Xanthine dehydrogenase (XD) (EC 1.1.7.1.4); Xanthine oxidase (XO) (EC 1.1.7.3.2) (Xanthine oxidoreductase) (XOR)] | C43-C48-C51-C73; C113-C116-C148-C150 | 2 × Fe <sub>2</sub> S <sub>2</sub>         | Electron transfer | 1.17.1.4; 1.17.3.2 | Cytoplasm, Extracellular space, Peroxisome | No | <p>DISEASE: Xanthinuria 1 [XAN1] [MIM:278300]: A disorder characterized by excretion of very large amounts of xanthine in the urine and a tendency to form xanthine stones. Uric acid is strikingly diminished in serum and urine. XAN1 is due to isolated xanthine dehydrogenase deficiency. Patients can metabolize allopurinol.</p> <p>[ECO:0000269] PubMed:10844591, ECO:0000269] PubMed:11379872, [ECO:0000269] PubMed:14551354, ECO:0000269] PubMed:9153281. Note=The disease is caused by mutations affecting the gene represented in this entry.</p> | <p>activation of cysteine-type endopeptidase activity involved in apoptotic process [GO:0006919]; lactation [GO:0007595]; negative regulation of endothelial cell differentiation [GO:0045602]; negative regulation of endothelial cell proliferation [GO:0001937]; negative regulation of gene expression [GO:0010629]; negative regulation of protein kinase B signaling [GO:0051898]; negative regulation of protein phosphorylation [GO:0001933]; negative regulation of vascular endothelial growth factor signaling pathway [GO:1900747]; negative regulation of vasculogenesis [GO:2001213]; positive regulation of p38MAPK cascade [GO:1900745]; positive regulation of reactive oxygen species metabolic process [GO:2000379]; purine nucleotide catabolic process [GO:0006195]; xanthine catabolic process [GO:0009115]</p> |
